# Supplementary material
Source: publisher figshare collection journal article supplement (https://gsapubs.figshare.com/articles/dataset/_/24069507)
Supplement: Supplementary file 1 [file 1]

## Sheet: Altyn Tagh
	Exhumation ages (Ma)		Final Age(Ma)	1σ		Methods	Age model		Reference
Jolivet et al., 2001	40	10	40	10		AFT	N.A.		Jolivet, M., Brunel, M., Seward, D., Xu, Z., Yang, J., Roger, F., Tapponnier, P., Malavieille, J., Arnaud, N., and Wu, C., 2001, Mesozoic and Cenozoic tectonics of the northern edge of the Tibetan plateau: fission-track constraints: Tectonophysics, v. 343, no. 1-2, p. 111-134.
Liu et al., 2005	25	40	32.3019	4.4464		AFT	N.A.		Liu, Y. J., Neubauer, F., Genser, J., Ge, X. H., Takasu, A., Yuan, S. H., Chang, L. H., and Li, W. M., 2007, Geochronology of the initiation and displacement of the Altyn Strike-Slip Fault, western China: Journal of Asian Earth Sciences, v. 29, no. 2, p. 243-252.
Wang et al., 2015	50	65	57.6963	4.27225		AFT	N.A.		Wang, Y., Zheng, J., Zheng, Y., Liu, X., and Sun, G., 2015, Paleocene-Early Eocene uplift of the Altyn Tagh Mountain: Evidence from detrital zircon fission track analysis and seismic sections in the northwestern Qaidam basin: Journal of Geophysical Research: Solid Earth, v. 120, no. 12, p. 8534-8550.
Gao et al., 2022	35	40	37.5438	1.42627		AFT	N.A.		Gao, S., Cowgill, E., Wu, L., Lin, X., Cheng, X., Yang, R., Soares, C., Ketcham, R. A., An, K., Gong, J., Song, X., Tang, J., Chen, H., and Yang, S., 2022, From Left Slip to Transpression: Cenozoic Tectonic Evolution of the North Altyn Fault, NW Margin of the Tibetan Plateau: Tectonics, v. 41, no. 3, p. e2021TC006962.
Ye et al., 2022	31	36	33.5377	1.43596		(U-Th)/He	N.A.		Ye, Y., Wu, L., Cowgill, E., Tian, Y., Lin, X., Xiao, A., and Chen, H., 2022, Long-lagged (∼19 Myr) response of accelerated river incision to rock uplift on the northern margin of the Tibetan Plateau: Earth and Planetary Science Letters, v. 591, p. 117608.
Zhang et al., 2012	33	-1	33	1		AFT	N.A.		Zhang, Z., Guo, Z., Li, J., and Tang, W., 2012, Mesozoic and Cenozoic uplift-denudation along the Altyn Tagh Fault, Northwestern China: Constrains from apatite fission track data: Quaternary Sciences, v. 32, no. 3, p. 499-509.
Shi et al., 2018	40	-1	40	1		(U-Th)/He	N.A.		Shi W, Wang F, Yang L, et al. Diachronous growth of the altyn tagh mountains: Constraints on propagation of the northern tibetan margin from (U‐Th)/He dating[J]. Journal of Geophysical Research: Solid Earth, 2018, 123(7): 6000-6018.
Zhuang et al., 2011	27	32	29.4821	1.41762		Sed.	Old		Zhuang, G., Hourigan, J. K., Ritts, B. D., and Kent-Corson, M. L., 2011, Cenozoic multiple-phase tectonic evolution of the northern Tibetan Plateau: Constraints from sedimentary records from Qaidam basin, Hexi Corridor, and Subei basin, northwest China: American Journal of Science, v. 311, no. 2, p. 116-152.
Li et al., 2015	41.2	47.8	44.4443	1.93026		Sed.	Old		Li, L., Guo, Z., Guan, S., Zhou, S., Wang, M., Fang, Y., and Zhang, C., 2015, Heavy mineral assemblage characteristics and the Cenozoic paleogeographic evolution in southwestern Qaidam Basin: Science China Earth Sciences, v. 58, no. 6, p. 859-875.
Sun et al., 2005	30	1	30	1		Sed.	Old		Sun, Z., Yang, Z., Pei, J., Ge, X., Wang, X., Yang, T., Li, W., and Yuan, S., 2005, Magnetostratigraphy of Paleogene sediments from northern Qaidam Basin, China: Implications for tectonic uplift and block rotation in northern Tibetan plateau: Earth and Planetary Science Letters, v. 237, no. 3, p. 635-646.
Cheng et al., 2016	41.2	56	48.524	4.23443		Sed.	Old		Cheng, F., Jolivet, M., Fu, S., Zhang, C., Zhang, Q., and Guo, Z., 2016, Large-scale displacement along the Altyn Tagh Fault (North Tibet) since its Eocene initiation: Insight from detrital zircon U–Pb geochronology and subsurface data: Tectonophysics, v. 677–678, p. 261-279.
Cheng et al., 2015	49	-1	49	1		Sed.	Old		Cheng, F., Guo, Z., Jenkins, H. S., Fu, S., and Cheng, X., 2015, Initial rupture and displacement on the Altyn Tagh fault, northern Tibetan Plateau: Constraints based on residual Mesozoic to Cenozoic strata in the western Qaidam Basin: Geosphere, v. 11, no. 3, p. 921-942.
Wang et al., 2012	22	43.8	32.6963	6.5787		Sed.	Old		Wang, Y., Zheng, J., Zhang, W., Li, S., Liu, X., Yang, X., and Liu, Y., 2012, Cenozoic uplift of the Tibetan Plateau: Evidence from the tectonic–sedimentary evolution of the western Qaidam Basin: Geoscience Frontiers, v. 3, no. 2, p. 175-187.
Wu et al., 2014	47	66	56.5379	5.42154		Sed.	Old		Wu, L., Xiao, A. C., Ma, D. D., Li, H. G., Xu, B., Shen, Y., and Mao, L. G., 2014, Cenozoic fault systems in southwest Qaidam Basin, northeastern Tibetan Plateau: Geometry, temporal development, and significance for hydrocarbon accumulation: AAPG Bulletin, v. 98, no. 6, p. 1213-1234.
Zhou et al., 2006	40.5	42.8	41.6471	0.661147		Sed.	Old		Zhou, J. X., Xu, F. Y., Wang, T. C., Cao, A. F., and Yin, C. M., 2006, Cenozoic deformation history of the Qaidam Basin, NW China: Results from cross-section restoration and implications for Qinghai–Tibet Plateau tectonics: Earth and Planetary Science Letters, v. 243, no. 1-2, p. 195-210.
Wu et al., 2012	15	36	25.3138	6.08493		Sed.	Old		Wu, L., Xiao, A. C., Yang, S. F., Wang, L. Q., Mao, L. G., Wang, L., Dong, Y. P., and Xu, B., 2012, Two‐stage evolution of the Altyn Tagh Fault during the Cenozoic: new insight from provenance analysis of a geological section in NW Qaidam Basin, NW China: Terra Nova, v. 24, no. 5, p. 387-395.
Wu et al., 2019	16.9	53.5	35.4135	10.7438		Sed.	Old		Wu, L., Lin, X., Cowgill, E., Xiao, A., Cheng, X., Chen, H., Zhao, H., Shen, Y., and Yang, S., 2019, Middle Miocene reorganization of the Altyn Tagh fault system, northern Tibetan Plateau: Geological Society of America Bulletin, v. 131, no. 7-8, p. 1157-1178.
Cheng et al., 2018	43.8	53.5	48.7437	2.7729		Sed.	Old		Cheng, F., Garzione, C., Jolivet, M., Guo, Z., Zhang, D., and Zhang, C., 2018, A New Sediment Accumulation Model of Cenozoic Depositional Ages From the Qaidam Basin, Tibetan Plateau: Journal of Geophysical Research: Earth Surface, v. 123, no. 11, p. 3101-3121.
Cheng et al., 2019	43.8	53.5	48.5382	2.79743		Sed.	Old		Cheng, F., Garzione, C. N., Mitra, G., Jolivet, M., Guo, Z., Lu, H., Li, X., Zhang, B., Zhang, C., Zhang, H., and Wang, L., 2019, The interplay between climate and tectonics during the upward and outward growth of the Qilian Shan orogenic wedge, northern Tibetan Plateau: Earth-Science Reviews, v. 198, p. 102945.
Jolivet et al., 2001		Liu et al., 2005		Wang et al., 2015		Zhuang et al., 2011		Li et al., 2015		Sun et al., 2005		Cheng et al., 2016		Cheng et al., 2015		Wang et al., 2012		Wu et al., 2014		Zhou et al., 2006		Gao et al., 2021		Ye et al., 2022		Wu et al., 2012		Zhang et al., 2012		Wu et al., 2019		Cheng et al., 2018		Cheng et al., 2019		Shi et al., 2018
40	10	32.3019	4.4464	57.6963	4.27225	29.4821	1.41762	44.4443	1.93026	30	1	48.524	4.23443	49	1	32.6963	6.5787	56.5379	5.42154	41.6471	0.661147	37.5438	1.42627	33.5377	1.43596	25.3138	6.08493	33	1	35.4135	10.7438	48.7437	2.7729	48.5382	2.79743	40	1
		37.386		52.6672		31.0124		44.6534				44.7146				22.4595		47.671		41.8506		35.1453		35.9682		32.4669				42.2975		46.2955		44.0768
		26.6295		63.1754		30.7856		46.9178				42.8827				39.0532		47.2772		41.1044		35.7537		35.9721		23.6728				46.6949		50.7073		49.5114
		32.0629		59.6569		30.3976		41.3777				54.5272				23.4478		55.4266		41.6259		35.5355		32.2551		16.9141				40.3365		44.7461		51.5164
		36.2962		50.8642		30.2276		47.657				48.4287				37.5295		54.0775		40.8428		39.6017		33.4094		24.9466				48.7681		46.175		45.8855
		30.0443		60.2574		31.4522		45.5237				46.0737				37.7996		48.713		40.9413		38.5952		35.0594		18.7434				38.1276		53.001		53.1207
		35.2758		62.3284		28.0867		43.0433				52.0806				31.4934		63.6682		42.5111		35.3118		34.2645		22.111				30.016		47.7161		49.6925
		29.7101		61.3865		27.7103		45.7326				52.8059				28.4226		62.6749		41.2494		38.7601		35.8346		15.1109				31.8393		52.9765		43.8131
		38.7653		60.4141		31.2945		47.2893				51.1977				25.7907		65.024		41.0393		39.1716		35.5405		26.8921				22.5711		50.8175		47.8892
		31.5962		61.035		31.1344		46.353				46.686				41.7697		65.092		42.1467		37.9485		32.0473		18.5755				53.4458		48.182		47.8255
		27.3201		61.6077		29.0165		42.591				51.7124				27.2387		56.8793		42.1292		39.5623		33.733		30.6295				17.5569		52.471		51.4714
		36.0169		56.1532		27.1288		44.1721				42.6207				38.9968		52.6841		40.6568		35.4701		34.5197		27.0336				47.1361		44.9663		45.6508
		31.0289		51.7489		27.9027		45.8718				53.4361				42.0675		51.2831		42.4017		39.9721		32.4979		18.05				25.6817		45.873		46.9807
		28.3262		56.1532		29.7275		42.2094				49.6457				33.4885		57.9636		41.4238		39.534		33.8745		28.93				18.5209		49.1013		46.8053
		33.4079		52.9885		31.215		42.8255				41.4567				23.6984		59.8725		42.1719		39.2445		33.21		26.9128				24.872		49.0544		47.3709
		25.4647		53.4555		28.829		45.7977				48.7772				29.009		64.9484		41.7208		39.9838		32.1314		30.1387				23.7823		47.714		51.7151
		29.1612		53.7986		28.4314		46.2339				48.0454				34.5757		60.2332		41.6849		38.1717		35.4483		30.9055				32.1195		45.6804		46.3191
		39.1158		51.5495		27.9849		42.8924				41.5415				22.1824		48.3911		41.317		35.2185		32.4267		18.6304				28.127		46.3264		48.5823
		33.9727		59.0006		30.7008		43.449				49.1704				40.3565		47.2369		42.7051		39.5407		31.0802		28.7592				27.2212		46.6986		48.4551
		35.3158		58.663		27.8645		43.7403				49.1662				27.3137		62.7191		42.4334		38.998		31.8072		16.2284				42.2676		44.2414		50.0185
		36.0439		62.4716		30.3935		44.8957				55.094				35.0256		60.2957		41.1561		35.1926		31.3066		18.9188				44.1169		52.3269		47.9758
		32.8553		64.2069		29.5843		42.9498				45.5386				29.6402		51.0767		40.9661		39.4158		32.6497		25.4284				35.5731		53.433		44.7721
		31.6594		59.1301		27.8949		42.9368				49.5881				32.5782		60.9619		42.1894		39.7531		31.1489		20.5429				27.6602		50.3579		49.2404
		29.0825		62.7424		31.1463		45.8908				41.9905				32.2434		56.8804		41.0404		39.6281		32.8938		33.9632				27.9217		43.9973		52.8707
		25.1047		59.0313		28.1396		43.5267				47.4984				41.0643		51.2742		42.151		37.192		32.1404		19.6691				20.9136		43.8512		44.2163
		34.3733		51.1293		27.356		44.5402				51.1139				31.664		58.0602		41.1183		39.9421		33.8711		15.362				42.1984		45.3413		45.296
		36.408		56.4898		29.6593		45.0179				53.0079				39.2379		52.7974		40.8282		37.94		32.6759		17.5411				50.5091		52.0117		52.8094
		27.2454		58.6679		29.249		47.6004				43.6788				36.4422		61.5087		41.5911		36.2684		32.9878		17.0284				52.2787		53.4912		50.8546
		25.1123		60.6047		30.4176		47.5977				45.1522				23.2259		54.5147		41.7341		36.0094		32.08		35.9228				45.6569		49.4792		48.3229
		27.1848		62.0123		27.0598		41.969				46.8453				23.9662		56.0678		40.6356		36.4393		32.8904		17.38				39.7246		45.3977		50.9118
		30.5922		59.3643		27.6748		47.0513				45.6355				22.6148		61.9499		41.9847		37.3574		32.8051		18.3801				29.7238		51.6699		46.9743
		37.4429		50.4672		31.0978		41.7949				42.1157				41.3425		62.3582		42.0161		35.308		31.9563		22.979				38.9693		53.129		43.9012
		29.7921		53.4774		31.0681		44.8871				55.3401				42.8045		58.5162		42.1603		37.596		34.37		25.0871				30.5394		53.3125		46.264
		25.9899		57.2178		31.6296		44.7045				50.6571				30.3538		59.5282		41.9633		35.5911		32.469		22.2818				51.39		44.772		45.7397
		30.8638		52.7859		27.6142		46.0338				47.5696				36.506		57.6922		42.0909		37.1032		31.1658		21.1004				23.3911		52.166		51.3972
		27.2683		54.4666		31.4223		46.532				45.9188				41.843		63.0102		41.0751		39.4165		35.665		30.7178				26.1492		49.9901		47.358
		39.2325		59.9181		31.8533		47.4453				52.8295				24.6018		47.2236		42.4406		39.6233		35.9755		18.8251				20.5876		47.9645		51.8103
		30.8887		64.562		29.3625		46.6127				55.3222				41.92		47.3826		41.9329		36.2091		35.1116		19.8576				30.5637		44.5499		52.1596
		34.3821		60.379		27.1426		45.7763				49.2553				29.8694		47.8842		42.1358		36.5484		35.0229		25.281				28.7178		49.2266		47.8362
		32.7188		55.5006		31.0286		41.8785				44.7861				30.6224		62.0305		42.6794		36.1729		33.1005		17.8666				44.3722		50.1421		51.1041
		26.0766		52.2913		28.7478		43.4038				51.5078				35.3293		64.2671		41.7859		39.8276		31.4668		21.4527				31.7232		48.0244		51.6672
		27.5614		63.7324		29.1853		45.8361				53.1545				37.1164		51.6967		42.3472		36.0795		35.4792		30.5138				28.822		48.4872		45.0427
		36.8319		54.7082		29.0237		47.6662				52.3034				22.2259		58.8596		42.7544		35.2567		32.585		24.6968				47.2164		45.588		44.5535
		34.0136		61.1009		31.6953		44.5502				50.4754				42.2119		53.6478		41.9588		37.8283		33.5978		31.9469				21.6072		48.4686		47.2844
		34.4095		61.6614		31.9218		45.7852				49.4646				38.3359		53.8091		40.5606		39.9351		33.7169		24.0436				49.5391		52.2214		47.0509
		30.4964		59.962		31.1492		42.1254				47.6638				27.4301		62.5389		41.4068		35.7766		35.2694		29.4719				44.0859		46.6356		50.2801
		37.4582		58.6387		29.074		47.2095				47.6974				26.5378		65.2367		41.3506		37.8982		31.9189		17.541				40.6094		51.5841		53.0332
		37.7324		63.5707		27.1714		42.5627				52.9793				28.2463		51.1763		41.8369		39.4906		34.7106		18.7418				28.8493		45.569		48.8966
		35.6701		58.9487		30.7701		44.7714				50.5465				40.9512		52.6537		41.6944		39.6893		31.776		22.9673				39.0859		47.793		50.8714
		33.2657		60.3637		30.5555		41.2459				55.7532				32.591		55.9173		40.6723		36.2225		32.7517		24.4877				20.6865		47.9205		50.183
		36.5158		63.8475		28.2077		43.6538				50.4188				29.0982		56.8051		42.2997		39.3138		35.4194		26.8728				49.5434		48.0389		48.6266
		32.0334		60.8073		30.5219		42.1947				49.1681				24.8947		64.1653		42.7259		35.9381		32.6697		26.3768				51.8578		51.8172		50.8949
		29.8695		60.0481		30.4204		44.7619				41.9529				34.891		55.1292		41.7536		39.3742		35.4461		15.9135				52.6864		51.0499		51.0635
		36.8985		55.5578		27.481		44.235				42.7755				40.6369		57.2442		42.3729		39.1102		31.6098		27.2943				25.1397		52.9183		46.658
		39.1087		54.1121		30.6607		47.0349				48.8745				28.4467		62.3495		40.5205		35.6818		35.8373		30.2519				20.2666		45.8035		47.8298
		36.0572		61.4701		28.6926		41.591				42.3154				25.1389		51.3543		41.287		38.1938		32.1373		23.5002				34.8013		45.1413		46.6379
		32.5174		62.2127		28.8547		42.0697				53.2318				42.9825		62.0108		42.3445		38.1052		31.8931		20.2332				34.4151		52.2684		53.0808
		31.4127		52.5717		27.105		45.2823				45.5542				36.9902		56.5299		42.0786		35.6902		31.6583		26.9728				46.8016		52.5029		49.257
		33.6699		55.1016		27.0796		42.5433				41.6622				25.1261		64.9464		41.8737		39.1107		31.0517		22.6897				53.3205		48.339		52.3137
		28.5523		61.3783		27.1489		47.3845				52.6036				37.1298		58.5299		42.3007		38.1681		35.6282		15.3855				46.6652		45.4922		44.7713
		34.377		52.4823		30.5284		45.9526				50.9105				42.4478		49.1986		42.252		36.4256		33.0054		15.2712				23.1469		51.2814		48.595
		28.4625		62.894		28.5873		42.0682				50.0874				40.6988		47.5173		41.3025		37.9647		32.2582		23.1626				20.6681		49.9536		48.4099
		29.9198		53.731		30.9126		42.9798				45.8414				29.4062		50.416		41.5058		36.3384		35.266		18.5118				34.1311		46.1398		48.0564
		32.4929		59.7935		29.4161		44.1425				47.0836				33.5021		58.1475		41.9915		35.5071		34.48		31.9557				44.6747		44.2553		51.0154
		39.5386		61.3643		29.6775		43.5494				46.0181				40.248		55.5129		41.2311		37.264		34.5755		19.7947				27.6029		46.6795		43.9684
		32.1638		50.2061		30.518		44.8263				46.9439				23.5959		48.4965		41.8475		37.032		33.8286		18.2172				22.9864		48.1364		47.2583
		26.9322		51.1144		29.2465		45.3454				50.2459				24.4224		63.9583		41.8089		39.8888		34.0999		25.1746				22.0481		47.8204		52.8048
		35.2321		57.2519		31.0765		45.7193				53.5327				23.5632		64.7933		41.5735		37.5959		32.6278		25.2571				41.9882		51.6219		51.7197
		38.6025		61.3743		28.0507		46.8883				47.3971				37.2549		52.9256		41.4394		36.441		35.5237		15.2453				42.1931		48.688		44.3633
		29.0725		55.1737		31.7425		41.5935				49.5441				30.6129		60.3483		42.6353		38.9852		32.8508		23.182				26.1607		49.5255		47.8703
		36.0395		63.1858		29.7244		46.0987				54.3741				31.4467		64.6326		42.1084		35.3295		32.1647		33.0104				23.7388		47.5721		46.9734
		32.9301		59.9686		27.0031		45.914				55.9053				27.2881		51.1041		40.9331		36.2841		33.2867		28.2356				45.9707		49.9453		44.4748
		32.4776		56.7734		30.0582		43.5805				55.9903				33.0302		61.037		40.9804		39.8093		34.845		20.5028				52.0219		50.6779		49.1383
		35.8816		54.3254		27.438		44.0462				51.459				29.6165		65.9291		42.7569		39.8285		34.9167		24.7065				41.3356		43.9654		48.1651
		30.1125		53.599		30.2625		42.5531				41.9184				33.7536		58.2256		42.6854		38.8403		31.733		16.8882				45.9304		49.1336		47.8139
		29.3558		60.2637		27.8337		47.673				43.0069				26.5711		55.7297		42.53		39.9544		35.4333		26.7593				39.8771		45.4994		46.2042
		33.6208		64.4907		30.7847		42.2626				48.8865				43.6549		53.7557		42.6611		37.5258		31.5312		28.5088				38.0164		50.4458		48.8112
		32.0273		56.9301		28.4603		42.1493				42.7736				37.8086		48.0188		41.2021		37.7862		31.6271		21.9927				20.6102		50.0208		49.9002
		31.4557		50.9299		30.3285		46.2185				46.6648				26.6966		52.1675		41.0636		36.4925		33.2269		17.8678				45.0835		48.0372		48.642
		38.9222		55.3992		28.4853		44.976				47.195				27.2969		60.4626		42.7082		39.6219		34.3024		33.1239				28.2578		47.5608		49.625
		26.4081		60.3351		29.951		47.5065				53.5758				40.6257		54.8116		41.1363		38.1705		31.8982		28.6473				49.0356		46.1036		48.4549
		39.1326		56.6119		28.9705		47.4886				51.43				40.7244		52.8519		41.1928		37.1853		35.6115		24.812				51.4872		46.1443		51.3876
		27.3854		50.0398		27.2183		45.1896				48.3794				35.8039		52.3228		41.8027		36.6846		34.0554		26.1659				24.2207		49.3581		45.9906
		34.2107		52.3683		29.862		41.6383				48.8212				24.2689		48.3726		40.5979		37.7845		33.3933		21.0176				21.3993		44.1214		47.5448
		37.4851		51.4985		27.9855		42.5303				53.0021				24.3959		62.9199		41.2556		39.1644		33.2862		33.7955				39.454		50.3618		49.3177
		35.7253		54.3784		30.3636		45.1066				47.1744				34.7774		50.6247		42.3892		37.1602		31.5651		25.4384				52.1599		48.9575		45.1588
		36.4968		63.3058		31.4953		42.6519				54.9353				28.3746		58.8078		42.5707		37.2828		31.045		27.879				31.6714		48.6622		51.371
		27.4983		55.6254		29.8749		45.5209				50.5306				32.0538		56.6323		42.1968		35.5155		32.4837		30.8375				50.5616		52.7734		50.5566
		35.7338		54.367		31.3008		45.5666				48.8785				34.9833		53.1887		42.0253		38.6306		32.4457		21.7119				41.7788		53.3164		44.9701
		38.8556		63.4585		30.4982		42.5504				42.191				26.5042		62.8962		42.3502		35.1497		32.9432		17.9865				52.1248		45.5679		46.2121
		26.7403		57.0531		28.8509		43.6493				52.8544				26.9814		54.9801		42.1731		36.9121		33.6519		21.263				48.6414		46.9305		44.9187
		32.1914		62.3534		29.3159		43.3745				54.2301				40.7289		53.1482		42.4632		37.563		35.1867		28.4174				30.1737		49.8861		44.2998
		33.1779		57.6753		29.1685		45.2976				47.3484				42.3532		52.153		42.2078		38.2633		32.0191		22.1955				28.0587		47.0854		48.3991
		31.469		56.9069		30.787		43.9451				43.8364				34.3748		53.6404		40.6731		35.3061		32.7444		25.6562				49.1777		50.2312		45.0133
		36.1309		51.3924		28.6621		45.6817				53.6913				25.0602		57.4279		41.8162		35.5914		35.6633		15.9112				39.6432		47.356		50.8377
		31.5089		52.8039		31.0577		45.6087				43.4358				31.1462		63.9954		41.7907		38.5012		31.6507		21.7287				20.2468		46.7065		46.6216
		35.7976		61.8515		27.9528		45.2833				52.8947				33.1881		60.0623		41.7708		39.5932		31.7027		16.5684				35.4392		47.0197		49.8126
		27.1463		53.4701		27.0909		45.6615				44.3479				33.5856		47.9736		41.4354		37.2909		35.9013		25.2997				45.9478		44.6917		50.9631
		34.1921		60.3832		27.6181		45.3895				54.8847				30.6792		65.7268		42.2597		37.5975		32.4184		35.7504				22.4278		46.8061		49.4004
		36.0153		64.0666		29.0393		47.0305				43.1536				30.2949		51.2426		40.5532		38.0896		31.2314		28.4929				43.0676		50.0866		51.3182
		25.9615		53.7121		28.5418		45.01				43.9286				35.1959		52.6116		41.5383		37.7486		31.2227		15.8625				49.8316		48.3144		52.3192
		29.9844		56.1781		29.7792		44.0606				53.0178				25.3101		56.3798		41.6774		35.9022		33.7476		15.6133				29.8948		48.1232		53.3378
		39.7472		50.4042		31.2302		46.9178				52.2639				43.4429		59.6128		40.6534		35.8931		31.9074		26.9114				21.7436		51.0802		50.5124
		35.7119		60.9297		30.7941		43.4093				49.0716				28.0878		57.2563		42.6875		38.7942		31.1919		16.9386				28.0985		44.1381		51.0389
		29.2935		56.0603		27.9876		46.2628				43.4721				22.2783		51.4343		42.4291		35.6269		32.5227		29.3823				50.5813		50.694		46.6237
		31.0784		55.4774		27.2835		46.0407				53.0734				30.3889		62.37		42.1023		36.8826		35.1555		28.0854				23.0268		49.2785		47.4092
		36.3188		60.1052		31.3458		47.3679				53.0024				37.2005		48.5104		42.4086		37.3324		33.9565		35.2544				18.074		48.441		48.5624
		34.1208		52.9083		30.0838		46.5291				42.8204				38.3747		59.5764		42.2414		35.8152		32.7581		18.8475				44.3858		48.3354		45.0601
		34.9373		55.2568		29.8288		45.3484				44.8592				23.4415		47.0377		42.0154		36.0391		31.6402		26.263				23.0232		53.1263		45.0773
		28.2276		52.0077		27.2899		42.6934				44.2959				34.1406		57.1116		41.5684		38.5184		33.6502		18.2231				36.8827		53.4981		50.7502
		34.5954		61.282		27.8118		44.2699				54.0241				24.0992		58.2353		42.1496		36.4161		31.6659		27.0942				30.8846		49.1905		47.4173
		32.7078		62.0504		29.433		47.1543				45.3895				25.2847		49.2553		41.5828		35.685		31.7304		27.7457				45.6884		47.3975		50.4736
		36.8411		63.2489		29.5999		43.7063				47.5657				35.6985		62.8626		40.7102		39.0383		35.2292		23.7476				51.3284		53.1189		47.7285
		37.9086		56.7762		28.0645		46.8858				42.2235				32.2612		48.4214		42.4339		38.8372		31.8929		15.0757				40.1995		52.8258		46.6482
		38.6211		64.2466		28.9095		45.7098				51.5784				28.275		51.1088		40.7825		35.116		34.6983		35.5045				17.0042		51.0609		44.9197
		35.1867		56.2168		28.0374		44.9439				53.5121				36.7655		62.777		42.6831		35.3082		34.4725		19.1193				49.1783		48.6953		50.9617
		29.1791		54.761		30.9291		45.1425				51.8098				22.6957		56.2219		41.6262		39.7096		35.9367		16.7865				17.2558		48.3161		45.7526
		33.7072		54.6565		27.5751		47.4161				44.5602				32.9562		65.3743		40.8307		37.6592		31.522		22.7404				27.6178		52.578		45.7298
		31.3297		57.4248		30.3726		42.908				46.8633				23.5595		50.1492		40.5202		35.8496		31.0119		22.9175				19.4105		50.7276		49.975
		39.7394		53.408		31.6301		46.9479				46.0295				32.7869		64.8688		41.5797		35.0475		31.5338		29.3929				32.8561		48.3488		47.104
		25.6603		59.9991		31.7094		41.4489				42.0677				22.5764		63.5161		40.6507		38.2591		31.7178		22.6707				50.497		50.3904		53.2149
		38.9655		51.276		27.941		44.1816				46.2145				30.7414		50.9294		42.5048		36.775		31.1619		34.1394				38.2724		51.3223		47.7435
		39.8178		57.1869		29.2949		45.96				43.4251				40.6506		61.2098		41.835		37.029		31.9632		22.941				18.2287		48.4013		50.0978
		36.793		56.9371		31.3641		45.7398				49.1437				24.9094		52.1107		41.0259		36.8209		34.871		19.4496				42.1155		44.8117		52.1309
		26.4371		51.7801		27.9666		42.456				45.368				42.0859		51.4963		42.2192		36.5956		35.5978		25.2337				51.6152		47.7883		52.2646
		27.2596		59.4094		30.5399		41.5253				42.658				24.1793		57.6728		41.1485		36.3561		31.9803		20.9738				27.1125		45.1123		49.8795
		37.8663		62.6457		28.0738		41.6463				47.7109				24.8957		52.5462		41.0203		38.2283		33.5909		22.9293				27.3269		50.7152		50.1846
		31.9736		64.2915		30.385		44.7252				54.5884				26.8784		65.3136		40.5348		37.7882		35.6433		35.2041				49.3063		48.5169		51.9151
		34.0383		64.2538		29.9492		41.5545				51.2835				41.384		49.3751		42.2553		37.3403		34.5822		15.9776				18.7118		51.4335		45.7864
		32.0731		63.3275		28.1483		45.7504				49.3835				41.0806		55.3566		41.1267		35.5154		34.4158		17.5977				34.1576		50.3123		44.2305
		38.6362		60.0928		27.9358		41.6349				43.1429				25.2018		58.0225		41.1112		37.6419		33.6528		29.6925				48.3552		44.379		46.1787
		28.7555		53.5792		27.8479		44.125				49.5198				22.5961		60.8477		41.7206		36.4698		31.0166		22.6366				45.9631		51.2816		50.8864
		27.0161		50.0022		31.7884		41.417				53.2129				28.9456		53.9828		40.8433		39.4796		32.51		24.4024				34.0363		46.7715		53.1046
		31.769		61.367		28.3179		42.4308				44.2635				40.174		48.5776		41.2141		39.7966		34.6542		21.6588				27.9514		50.1809		47.4536
		26.8632		55.3336		28.9601		42.8183				53.497				42.6598		49.0765		41.4553		39.0968		35.9566		17.958				27.9012		51.1317		47.1324
		37.0263		64.6289		30.1157		42.4135				52.6158				33.5434		60.3012		41.9481		39.6844		35.1936		22.0373				36.9662		45.1024		48.7887
		31.7282		52.261		28.3068		42.3594				55.8076				41.1197		56.2718		41.9327		38.9112		32.7331		15.8185				37.8858		48.1865		44.8878
		30.8007		52.5726		27.3953		46.5882				45.1356				43.5441		52.3558		41.4096		38.8477		35.6079		34.4986				36.179		48.1461		45.0067
		31.9091		63.1116		29.4748		46.3005				42.2875				37.0878		65.1259		40.8422		37.9265		35.0337		24.4893				41.9471		50.5276		49.9873
		28.8399		52.6643		28.2463		41.9553				50.1269				32.718		60.7715		42.222		35.2786		31.0635		23.084				42.887		51.1698		46.5264
		37.77		54.9126		31.7523		45.8863				48.0851				40.0036		58.8622		41.5707		39.5859		35.464		17.2206				28.9821		47.9213		44.6972
		26.1212		64.3823		27.1907		45.1355				55.5724				38.0228		47.5459		42.6166		38.0117		31.1824		22.9456				26.3668		50.2069		51.7093
		39.3258		63.3943		31.4566		44.375				47.0796				31.0739		65.0768		40.5281		38.6534		35.8261		25.4984				38.3526		51.1368		47.9284
		37.0792		50.8605		30.1496		41.7836				51.2413				30.3992		51.8681		41.5138		37.9662		33.8489		35.5035				17.1349		51.8694		49.9496
		26.9584		52.1788		31.7738		42.6283				47.7792				26.4491		63.5599		41.1278		37.1862		34.8686		22.9086				50.2858		49.0623		49.3013
		30.2662		58.0324		30.182		43.984				54.3664				23.3294		49.4522		41.7036		38.1213		33.1389		34.9933				47.3421		46.9126		50.023
		37.8863		59.1804		31.1781		45.4664				53.9701				27.2931		49.9696		42.288		38.5124		34.882		32.6542				18.2082		48.7615		53.1188
		27.3664		51.7599		30.1037		46.9032				47.0197				31.7588		50.8826		42.7341		37.712		34.3023		21.1501				42.5787		47.6751		46.1443
		26.0077		62.7528		29.6852		47.1008				55.7872				28.1884		58.1217		40.7766		36.5235		34.8653		35.8335				48.0726		45.021		46.6165
		33.1331		63.6292		31.5556		47.3396				44.479				28.9806		61.9886		41.1268		38.0532		32.8586		27.264				33.8158		44.4728		45.0686
		31.457		56.6227		30.5887		41.3639				50.0828				29.7424		52.9715		42.1929		35.0529		32.8006		30.5269				40.2123		48.4137		51.4244
		35.3763		60.824		27.7853		44.7333				49.5906				32.2464		59.7038		41.065		38.2025		34.1277		22.5353				48.6086		51.1536		51.7707
		34.71		50.6524		29.5402		42.7924				42.6572				40.3091		56.067		42.1965		35.3567		31.9221		18.3419				43.2557		46.0228		44.3717
		27.1583		61.8682		28.9096		46.2716				45.3467				42.3454		47.958		41.5921		36.8277		32.0803		30.4476				34.4558		49.2331		52.2508
		27.1532		50.6023		31.5262		42.7083				51.9665				43.1547		49.5533		42.4802		38.8402		33.2928		33.5903				33.5815		46.229		48.3457
		37.8655		53.3186		27.1325		47.2466				41.5081				26.2624		55.0214		41.786		39.9878		35.491		23.3309				45.1209		45.6417		51.9895
		29.4339		55.201		28.0132		44.2623				51.882				30.6632		52.1973		42.0657		36.9206		34.7724		27.7841				19.3652		44.5236		45.0835
		32.9284		58.0306		28.9217		44.1895				42.574				42.3141		51.2448		40.7281		36.9185		33.1729		16.8906				51.4324		50.4001		45.1223
		37.7696		50.4975		27.9841		47.5921				44.9546				41.9212		63.3095		41.568		37.1053		31.1135		18.4714				40.359		45.4224		45.7749
		30.5333		52.7881		27.9433		44.0752				54.5194				34.7034		58.1773		41.7027		35.3309		35.0238		26.3618				27.2789		46.4068		44.3884
		31.292		50.0275		31.2738		42.9301				48.7907				40.031		57.6208		42.4282		37.0459		31.0025		15.2644				18.4157		48.5528		47.8141
		33.8205		63.5556		30.9595		44.6001				49.0442				27.0386		54.5132		41.478		37.7106		34.4065		17.2834				18.0709		49.5148		49.4494
		34.5585		64.6612		30.8592		42.8807				52.8631				34.5382		60.5435		42.6605		39.2638		31.1901		25.4614				41.3446		45.4529		50.9545
		33.3213		61.3189		28.6625		46.1034				51.3315				43.0886		62.2396		41.4949		38.9977		33.6745		34.2326				32.5272		49.9938		50.7717
		36.9899		56.805		30.2339		44.3566				53.9499				36.6457		63.3436		42.5087		35.3174		32.1179		28.6573				32.7359		50.7945		47.0308
		32.4966		56.2863		31.8994		46.7781				50.6357				40.2853		52.4653		41.4842		36.2387		33.1692		17.9384				53.1959		43.9898		45.7933
		28.7379		51.5542		31.2284		47.4583				45.8131				43.5756		52.5885		41.291		36.7621		33.8605		27.2541				18.4031		46.7451		48.1425
		28.1676		56.3972		31.6724		42.2931				47.6886				22.6955		56.4328		41.6442		36.9582		35.8157		35.0393				42.39		49.4965		45.7274
		34.9009		57.7272		27.2008		41.5542				43.026				35.5648		47.5716		42.624		38.5937		33.8747		30.0561				32.875		52.5868		50.0006
		28.3091		57.9551		30.4301		44.1762				45.1227				28.4605		52.1155		42.2782		39.0379		33.4354		26.7563				24.1837		47.6274		51.1212
		37.2085		52.8638		31.2521		47.3982				41.2634				22.3046		49.9553		42.1022		39.3199		35.8408		34.1995				50.7994		47.1346		48.3132
		28.4611		58.1447		28.5362		46.4447				55.3873				37.6255		49.999		40.5784		35.3707		33.5556		18.7341				25.8131		47.7534		52.0311
		38.2778		53.2883		30.333		45.0783				47.1483				24.1088		64.5921		41.6551		35.556		34.1044		35.0182				41.5784		43.8876		45.833
		26.3742		53.695		28.7263		44.6271				46.0507				38.1356		59.5606		41.4944		38.6986		35.8697		24.9027				39.2263		48.5775		48.2373
		32.5744		63.9538		31.0063		43.5845				54.6394				42.1494		52.7223		41.0152		36.9015		32.7945		20.9319				38.3854		49.4914		48.7612
		37.1495		54.2745		29.3743		45.3191				55.6366				26.0805		53.2225		40.656		39.4526		34.2707		20.0221				16.9542		50.9841		49.1728
		27.0053		64.2865		30.263		46.9739				54.8586				23.8366		51.2794		41.9357		38.7704		31.7498		22.3165				45.9606		52.5684		51.5411
		26.8977		51.6479		30.0209		45.8234				46.8078				40.439		53.5079		40.8549		38.8779		33.2616		26.1839				38.8811		51.3097		46.7524
		32.0469		59.081		30.9658		45.9532				51.745				25.7808		55.6981		42.2521		38.0649		32.258		22.5837				31.8776		45.335		46.5185
		27.216		61.6126		31.6965		46.3541				53.7757				41.659		53.1357		40.9449		39.8293		32.031		23.1963				47.6141		45.105		44.6806
		25.4741		62.7604		28.4337		43.2021				55.5829				23.64		58.785		41.7293		36.9585		31.42		19.027				20.4948		49.2496		47.5295
		28.5412		63.2625		30.573		45.9855				52.7852				39.0698		52.1824		41.9079		37.2511		33.0628		16.2335				48.4536		52.1649		51.7017
		27.9692		63.7852		27.4349		41.2783				51.2289				35.9132		47.5655		41.0389		37.6622		33.8366		32.0252				37.31		45.6043		44.8014
		26.34		61.6619		29.6357		47.5987				45.2786				26.4704		60.8569		41.0925		39.3708		34.1442		30.2411				31.616		47.4189		46.2257
		26.7684		61.5938		29.2215		47.2571				49.1042				34.4521		61.661		41.0023		38.0854		34.3142		19.8707				22.0865		50.3559		51.9261
		33.3937		52.1934		27.5855		43.2688				48.6668				40.183		59.2157		42.2759		37.2856		35.0143		25.1267				22.0466		52.5975		44.1899
		33.0077		56.1305		30.9796		42.2534				54.5051				38.0242		52.4923		41.9706		38.9336		34.6895		26.2405				47.7269		47.1717		50.6894
		27.846		58.1598		31.3493		46.5511				41.7282				38.3039		57.7694		41.6874		38.3144		32.9056		32.1846				18.4772		49.4779		44.7637
		30.6285		51.787		29.3126		46.9572				55.9395				42.3466		55.2128		42.0577		35.4053		32.5648		22.9639				38.0504		45.4744		44.5736
		35.3547		54.9534		27.1306		42.021				47.4619				26.557		51.931		41.1571		38.9365		35.034		33.1465				22.5851		43.8903		46.548
		32.8577		53.2192		28.6413		44.9885				50.7664				42.3132		52.4939		41.159		36.3838		32.5369		16.0974				26.6202		47.2389		48.1048
		38.2064		64.9468		30.481		43.9487				44.5192				22.6107		51.7081		40.7138		35.8294		33.2325		31.6964				47.6744		50.4601		52.4855
		32.9827		56.0112		31.6656		43.8269				45.7146				24.434		58.4583		42.6953		39.4953		32.8984		32.9317				41.9084		45.322		44.9703
		26.6402		63.4268		29.9813		43.5458				47.5097				24.2347		48.1644		40.9682		39.3799		33.8335		19.4779				47.7545		44.4668		53.3651
		39.7554		60.8307		30.6208		46.9601				48.0153				23.5857		53.3732		40.7531		38.9964		35.0218		19.76				36.1755		53.3958		53.2038
		31.8431		52.3619		28.8697		45.2905				46.353				42.6415		48.9358		40.9287		36.7339		31.2932		20.3941				50.9788		51.893		52.9719
		28.8271		51.5444		31.8778		43.7991				45.3144				24.6732		58.3408		42.1787		37.1167		31.2762		18.2082				25.2011		49.2564		46.0233
		34.9386		53.8763		31.7703		43.0758				55.9558				22.6404		54.7895		42.0417		39.1568		34.7859		25.5999				35.9947		46.9607		47.8535
		25.7512		59.3346		31.1657		44.2509				48.8578				35.6915		59.9209		41.5709		38.4522		35.0394		29.6986				28.0947		46.4668		45.7717
		27.7592		62.8718		29.4599		44.3332				43.5058				24.1291		63.0748		42.0915		38.79		33.3872		19.0549				36.8721		52.4268		52.9887
		37.6344		59.6539		31.6218		42.7636				46.5541				34.0949		47.1043		42.606		36.1681		32.8144		30.8115				18.8247		49.3722		53.3431
		37.0849		56.0045		29.91		43.3232				46.8379				36.0411		55.3263		41.6624		38.9902		33.5096		29.1468				29.0992		47.3499		51.9276
		38.5582		61.4587		29.0422		45.3799				52.1579				39.5126		59.9515		42.5825		36.6188		32.1893		33.0388				32.8418		47.0049		46.1996
		26.1572		61.5713		30.3189		42.262				42.039				33.7326		47.5017		40.6482		35.4546		32.1505		17.6131				25.5395		48.4981		46.2914
		32.3169		54.506		29.2428		42.1513				49.5072				40.8784		62.1416		41.4556		37.4622		32.4259		29.2399				43.4859		49.0021		46.747
		36.0655		58.5387		31.4345		44.3946				44.5662				34.8855		55.7644		41.8434		35.8455		34.4712		34.4755				21.166		51.4093		48.7331
		39.8761		57.7558		27.8168		47.4451				45.5288				23.2763		56.4044		40.575		35.1314		34.9077		22.5894				35.6181		52.1081		45.35
		30.6863		63.5167		31.1393		42.5425				48.3448				23.097		60.4079		42.0414		36.9489		33.0142		17.4806				22.8466		49.8903		50.8358
		34.3418		62.0276		31.9487		44.8256				49.339				38.5687		54.9159		41.5428		35.8322		34.5824		17.8806				41.9243		52.4572		44.8003
		27.0467		61.0622		29.2105		43.4368				53.395				42.5762		55.485		40.975		38.0811		35.156		34.7824				26.614		47.186		44.7381
		36.4402		54.2546		31.4623		45.0668				41.364				26.8638		48.8825		41.2906		38.7249		34.2195		35.3892				24.8007		46.1931		48.2443
		30.9492		63.4656		31.1128		45.5802				45.2885				40.4566		59.3554		41.1016		36.5376		34.1525		29.3274				31.4503		50.0188		52.9865
		39.1651		51.8973		28.3454		46.1823				48.3289				25.7933		56.1794		40.9369		35.7983		34.304		16.2434				27.9353		49.6668		44.1181
		34.8576		56.1496		30.2338		47.6239				46.0333				40.302		64.7538		42.5162		37.8774		33.9375		34.5867				36.1447		47.1197		49.761
		29.1825		59.2844		28.8068		41.9975				54.2254				35.8907		55.2711		40.7514		39.8709		33.9769		34.2334				26.7816		51.5453		47.4644
		25.8342		53.5377		28.3366		44.1639				42.1238				33.5145		65.9098		42.0517		35.4103		33.8963		27.3367				46.4538		50.9493		49.7866
		38.9732		53.4514		27.6038		44.6303				49.0452				28.6407		58.7122		42.4629		35.5178		35.8664		28.3465				49.6065		51.6034		53.3917
		36.7234		62.4281		30.4056		41.7255				52.1214				27.9935		60.0005		41.7759		38.2565		31.907		33.4612				35.6899		51.9753		49.7035
		32.99		63.356		29.3578		44.7499				45.592				32.5608		51.1584		42.3516		37.198		31.7886		25.5878				20.583		47.5076		47.0982
		27.3524		60.0404		30.338		44.78				42.2509				40.9032		57.2072		42.2613		39.6522		32.3634		16.7636				53.2271		51.6723		47.9982
		28.498		57.4115		28.8409		44.6439				41.2446				40.0663		65.7303		41.2338		37.9737		35.1879		21.0505				47.6557		48.058		46.6538
		32.2726		52.8775		30.7254		47.2385				52.4789				33.425		64.0069		40.8589		39.6404		32.095		24.6663				21.1775		51.7695		44.7716
		37.534		54.4807		28.3424		42.6969				43.4516				37.4096		64.0434		40.7793		36.8742		33.0629		24.9592				33.258		52.8627		47.6986
		36.5429		50.7438		30.7109		41.3685				41.6233				37.3154		59.4731		42.2733		38.1096		34.8733		28.9005				30.1274		47.2136		47.7098
		37.5		54.431		30.0153		42.9531				47.7851				34.3117		62.7023		41.0727		36.8712		31.6141		18.9838				35.5108		48.6445		51.9799
		26.146		51.2279		29.9952		44.2808				44.5008				35.8681		57.5952		40.9422		38.3588		34.8412		22.117				20.5656		47.081		46.1071
		25.0084		58.0263		30.782		43.3388				48.6329				40.809		57.7269		42.6525		36.7882		34.1158		34.7251				42.4327		52.8866		52.541
		29.8069		60.6335		31.2534		45.4199				53.291				37.3177		52.6922		40.5194		39.7679		34.8615		26.4781				44.8405		44.6978		46.3909
		34.701		56.7575		27.099		41.4915				49.859				35.6361		49.7384		42.2338		35.9481		35.4676		20.468				46.2591		45.2329		43.9392
		26.2674		52.0898		28.8234		42.41				46.8845				26.0554		57.6115		40.9757		37.553		31.5865		24.0185				39.7035		46.4707		46.9511
		26.9641		59.0381		27.5936		43.7407				49.3345				30.3028		50.5137		42.1486		38.5714		31.8294		28.1189				37.9596		51.2442		47.466
		35.924		53.8956		27.7415		43.9922				47.2026				23.2133		51.2004		42.0036		39.8062		33.3464		16.1626				30.5725		45.039		44.7369
		35.8243		58.0132		29.7879		42.4537				53.4921				30.0582		61.5107		40.8045		39.9853		35.9475		19.4655				26.7542		51.6778		51.4539
		36.978		62.08		30.5421		44.1399				50.9345				42.2118		65.5481		41.5886		39.6233		33.4408		21.2876				28.6431		44.2129		47.4676
		39.9493		63.1543		28.4471		44.2927				42.588				43.3773		59.9011		41.7251		35.8942		35.8642		18.0138				22.846		50.4453		47.5818
		25.1629		52.3045		28.1191		47.6964				45.363				39.5477		54.1637		42.0697		37.1918		33.2384		24.9545				52.7941		46.0329		47.1653
		31.2061		60.537		27.6112		44.1633				55.6707				36.7256		52.1407		40.8834		39.0354		34.9355		16.5153				38.3596		51.4455		48.1623
		39.6027		55.6663		31.2758		42.3022				49.7522				38.405		49.3545		41.7959		39.3465		31.5565		19.2427				19.1734		44.3098		49.7757
		39.983		55.2495		27.3976		44.1301				46.1317				29.2289		55.6626		41.9749		38.1005		35.0458		16.3493				46.1551		49.0178		43.8642
		25.346		58.0178		28.1875		44.1565				48.0558				35.3721		61.2964		41.7505		38.5043		35.7764		18.072				17.7047		47.8678		51.7926
		35.0461		63.684		30.9909		46.1921				52.4664				29.2039		52.7327		40.8166		35.4113		33.1502		29.2628				32.9624		44.1085		49.8179
		39.2985		58.8595		27.0761		44.2555				48.6251				24.7458		58.3413		42.6394		39.268		31.7928		35.811				23.8839		46.5839		50.5088
		25.7853		64.0726		30.4639		47.7441				42.0031				25.254		48.0498		41.5212		35.2131		33.615		18.9668				32.4482		51.5647		50.4613
		32.8888		53.2376		27.1804		44.0877				50.7314				34.4623		50.4356		41.965		35.5138		34.4415		16.198				48.9131		44.1627		47.7479
		25.7902		55.528		30.6265		44.0383				43.3462				41.8895		63.8701		40.9725		37.4501		31.6632		28.125				34.962		47.8386		46.8833
		32.8546		59.5568		27.8717		42.1366				54.0052				23.7071		49.116		42.2456		38.1245		35.6141		30.9521				22.504		49.4603		47.081
		36.2079		63.1279		28.625		41.8351				54.7217				27.3318		47.4225		40.7814		35.079		32.4483		29.492				40.5123		45.6006		51.2556
		38.4341		63.3173		28.0802		43.1867				55.27				43.1024		62.3512		40.6214		38.3804		34.0217		21.8393				24.6567		47.561		44.7166
		37.9234		64.6003		27.6497		46.9638				47.5048				41.3118		51.3063		41.6737		39.834		33.83		23.0962				52.7302		47.115		52.9805
		38.4901		58.8106		29.7156		44.5976				48.6084				33.224		63.0751		40.6484		35.389		32.8381		16.2186				29.2416		52.8165		51.4575
		29.7865		59.626		28.7638		46.9289				42.7735				22.2117		47.2125		42.7767		35.5229		31.7748		29.2172				41.3661		47.4273		45.0336
		28.0426		58.2073		27.6633		46.3774				49.0104				22.8617		59.3887		41.3708		35.4185		33.4667		32.9258				49.5767		50.8802		46.0407
		34.5177		55.6736		31.7844		44.8572				43.042				26.1513		63.8924		41.6078		36.022		32.7725		29.5354				33.8287		48.1314		45.9667
		25.3874		61.2152		29.651		44.3597				55.9516				34.2582		62.3647		41.9141		37.0056		31.4572		20.3159				23.3587		50.7994		52.7134
		39.0824		61.0146		29.8549		43.8797				48.8845				39.2836		53.7184		42.2815		35.9728		34.1646		25.2427				27.4369		48.3166		51.1522
		35.9787		62.805		31.4159		42.7878				45.852				28.4582		48.2555		42.2277		37.4416		31.7908		18.1072				26.8297		49.4725		52.4917
		33.5041		61.2604		29.1421		47.3817				53.9752				22.9487		52.8759		42.468		36.0025		32.1505		30.4249				17.6116		53.001		47.9646
		26.8068		64.5665		28.4507		45.6399				45.1591				23.4657		57.4543		41.2582		37.4674		31.1907		22.2035				50.7327		51.8367		53.4962
		37.7873		60.1806		28.4269		45.5609				42.7626				31.3543		62.228		42.4182		36.0327		31.0695		23.4521				29.6768		44.8516		53.3492
		39.769		55.9689		28.3547		41.7883				54.5447				37.1828		60.3608		42.0104		39.7371		31.6588		15.1544				22.6101		53.2958		49.6161
		26.2817		54.3207		29.5712		42.7404				43.2849				33.3331		52.684		40.9345		39.5045		33.7563		29.2002				47.0615		52.4895		50.5249
		28.4812		60.2469		31.3523		42.2307				53.7531				36.6719		51.0713		42.522		36.7653		34.9384		27.2715				28.1378		46.5279		49.6342
		31.1857		63.8513		29.8428		44.4892				55.7273				25.1789		60.6439		41.1626		36.327		31.1952		33.3776				29.7354		49.5888		44.1979
		36.3035		53.9717		30.1922		47.4857				45.1732				22.9879		49.2933		41.7304		36.1973		32.0192		30.4273				33.7618		47.9887		44.5873
		29.1539		62.9659		31.3867		47.4604				49.3692				39.5711		47.6701		40.7727		38.3468		35.4495		23.613				21.6781		50.726		44.9662
		26.4442		50.259		29.0655		46.8741				41.8109				29.6729		48.3749		41.5944		38.2687		33.2181		17.2412				26.478		48.4367		50.5762
		25.4099		55.0944		30.4984		44.6647				55.099				31.3499		50.2577		40.5343		38.8335		32.798		30.5335				35.6175		52.1817		51.0637
		36.1851		61.5608		31.5021		44.6321				50.444				29.909		53.6463		41.8879		36.8317		35.2773		32.513				51.8493		46.3649		44.9497
		26.4795		64.4295		29.9084		41.9815				44.3786				36.594		51.0757		40.5627		37.9058		33.1359		23.6061				53.4688		50.4145		47.2879
		27.5151		62.015		28.3197		42.392				54.9237				40.2975		52.5629		41.2903		36.5789		34.193		34.0054				43.7526		45.3848		51.5397
		30.5477		50.4793		31.878		42.3702				42.8993				32.5823		53.1175		40.7228		35.7356		31.7291		16.2372				36.9194		46.5178		44.2102
		28.9189		50.5659		28.4944		43.4683				47.2966				26.1362		47.8337		40.7128		36.8022		35.976		34.6955				20.6659		52.3734		46.6895
		34.4422		54.1655		27.3818		44.7415				49.7962				25.3303		61.7382		40.9035		38.894		33.5328		21.0086				23.3884		50.3556		48.342
		27.8929		60.6882		28.5931		47.5035				55.1016				22.4203		63.8623		41.1986		39.9789		33.4122		24.9504				25.1213		51.2035		47.0533
		37.7536		54.6472		29.1957		44.6294				51.8257				27.1468		63.2393		41.6443		36.6964		32.9858		17.3713				18.1605		45.1231		46.1373
		26.843		63.2909		30.2119		41.9881				46.0675				23.1305		58.5314		42.0437		36.9633		34.6132		31.2007				36.0123		52.0882		47.4057
		34.2536		55.2653		29.5712		43.208				46.0416				35.4806		56.5875		42.2231		36.3035		31.5593		17.5765				38.8544		48.3946		46.27
		38.5867		64.4454		30.6054		47.5092				47.815				42.9271		58.1049		42.2609		39.2245		34.0188		33.7352				30.1953		47.9948		48.0473
		36.0807		61.3807		30.7399		47.3208				43.7744				39.6391		47.0915		40.7407		35.9402		31.949		28.896				42.4932		50.9797		51.7016
		38.2084		61.6625		29.0887		42.565				51.5544				43.0591		50.4062		40.5423		39.7976		34.3203		34.8262				42.0568		47.7087		52.9252
		28.5598		61.8794		27.2735		42.3185				50.5673				26.7257		65.473		41.6488		35.6453		33.4377		35.4701				27.5762		51.8388		52.944
		35.0698		62.8731		27.795		45.4001				48.01				37.5335		63.5989		40.8229		37.5394		31.2575		34.1381				47.4142		48.2916		52.0312
		30.4013		62.5448		27.6855		44.6621				46.6246				22.5299		65.8039		42.0009		37.3081		32.5712		15.678				39.93		45.3538		46.5051
		26.9381		54.7611		27.1556		41.6295				48.3272				28.7117		61.6786		41.8736		36.9617		31.9121		31.868				49.2617		45.4964		44.9308
		26.3809		50.7382		27.6265		41.4003				46.8444				32.3362		53.0943		42.0324		39.6557		35.6628		28.475				44.2576		52.7028		48.345
		37.2891		61.281		28.6295		41.6862				53.4198				22.7263		51.9133		40.9275		37.5296		32.6642		31.4281				30.6108		49.3177		49.646
		31.7277		62.3961		30.2769		41.2243				41.8435				37.0401		47.8888		41.8384		36.4662		35.9459		28.5566				38.2393		52.3825		44.7148
		27.1826		57.5557		28.3802		43.9265				49.0606				42.7605		53.8718		42.3781		38.6424		32.283		25.6718				47.5261		52.3325		44.254
		25.9545		64.4736		28.9508		45.9574				48.3751				28.5265		64.6549		41.3446		36.6331		33.8469		27.6733				25.3997		51.7409		48.2986
		39.6961		51.4274		30.7308		44.0179				44.264				28.5069		47.3204		41.9847		37.1445		33.6588		20.5699				32.7859		46.2525		45.4858
		33.8277		59.4927		29.9487		41.4334				45.169				26.2951		59.3173		42.6684		36.4523		32.5803		25.8545				44.4434		49.8707		49.1985
		33.6628		59.8066		31.4286		42.9521				46.5796				34.6164		62.7068		42.4826		39.5261		34.2796		16.6142				36.577		52.3839		44.0751
		30.6163		58.9814		30.2251		47.5718				42.579				40.3313		56.9324		40.6187		35.5244		34.7265		29.9297				18.4293		47.369		51.9114
		29.5799		54.7185		28.9805		41.8941				42.4421				23.2463		64.026		40.8577		39.5349		35.6724		32.8946				32.3685		53.3468		49.8522
		31.475		59.0962		27.9979		44.1847				49.8728				30.5297		47.8287		41.7196		36.1302		32.2238		30.7294				42.711		48.1866		45.6504
		29.1618		56.7462		29.0435		44.0033				42.4714				42.818		64.4196		41.4382		35.5114		32.5199		19.2337				20.0202		53.2846		47.1481
		37.0383		59.6829		27.7836		46.087				42.3335				37.1311		52.1978		41.1782		37.5266		33.626		31.1642				52.3088		50.8487		48.6956
		32.8333		54.9791		28.0188		47.728				51.3415				30.8363		57.6602		42.0475		35.0397		31.6744		33.6837				47.171		51.3469		49.2789
		29.5312		55.4928		30.0876		46.1823				42.1496				22.9548		64.6769		41.0479		39.1475		34.274		19.5793				43.1471		44.0723		50.9834
		32.3335		57.0535		28.6159		46.3981				45.5281				42.9791		58.7439		42.3393		38.8208		32.341		25.139				17.559		48.8242		47.21
		37.0384		56.3804		28.4329		46.2919				53.9789				37.9958		55.6908		41.7172		37.3086		31.685		32.6113				52.0183		46.4916		50.6401
		27.8297		59.4226		30.5711		44.0351				55.7131				27.4917		60.4539		40.6035		37.4119		35.4536		21.251				43.9478		50.7273		52.025
		28.4302		64.4712		29.4139		46.0355				48.8917				22.6639		52.9927		41.1564		39.5703		32.8435		34.3008				19.0408		47.2539		45.0562
		31.7384		54.9318		31.9257		43.9973				53.1519				27.7301		47.4103		41.7901		39.7613		35.8063		24.8114				42.6061		51.5118		48.9598
		25.0893		64.0549		30.5476		45.7303				52.9524				22.4984		60.3451		42.1736		39.1629		33.208		35.0529				27.2791		44.8132		53.4122
		37.1883		55.6495		30.0254		46.2681				44.7833				41.4933		57.5544		41.295		35.108		33.7388		28.6923				39.3166		50.7022		50.9315
		36.1784		64.3673		30.4713		41.8266				48.9869				24.0454		55.5818		41.1926		38.9352		34.3139		27.5561				34.184		47.2325		48.5428
		33.1738		61.3798		30.377		43.0244				46.2033				38.8579		53.5042		41.0919		35.8242		31.571		19.3942				25.1875		51.7951		51.5892
		36.8149		62.1998		30.8109		44.4424				47.0201				41.4557		58.1744		40.6252		37.9889		35.7957		19.7381				42.4276		48.524		46.8532
		36.6167		64.1125		29.6146		41.685				44.5142				41.2898		61.3642		41.0799		35.8084		34.5655		35.4778				25.6257		51.305		48.0729
		38.2307		59.799		31.7613		46.3274				46.5569				31.1343		53.2824		40.9856		37.5308		33.2422		29.7602				27.7065		45.339		47.0663
		33.6236		63.7975		30.9251		44.1066				47.0231				31.2079		63.7846		41.5121		37.5896		33.0958		33.823				36.2834		51.3131		46.4291
		31.4601		59.2083		30.6666		47.0307				51.8821				42.9078		62.6468		40.7683		36.781		35.5284		27.5338				39.9788		50.8006		46.9922
		29.6919		63.1922		30.0045		41.6224				45.3986				35.7735		50.141		41.3035		36.9631		31.042		34.1587				30.2891		48.1094		49.6553
		27.6879		56.8802		28.8384		46.7346				41.39				41.0271		65.7926		41.2668		35.1308		35.6631		19.8075				27.7681		53.0307		45.4603
		25.7225		54.5793		30.1987		41.5701				50.3471				29.342		47.8524		42.7184		39.1165		32.8879		34.4848				42.3984		53.216		49.2624
		33.0966		61.7436		30.7944		44.2471				55.8875				33.4107		48.8689		42.5902		37.1139		33.4179		31.7101				53.39		44.5273		49.3108
		28.61		62.2133		30.8453		44.3928				54.1743				23.5939		49.5855		40.6253		37.06		32.7998		17.2291				52.4717		46.7077		50.8817
		25.185		51.0914		28.5834		46.514				53.6281				23.8197		64.9448		42.5952		37.3323		35.8723		15.6466				19.5419		44.8643		45.9088
		26.1593		63.1636		29.2234		46.9753				49.6166				41.8261		49.6801		42.07		36.7148		31.9974		27.7568				21.6249		51.5759		46.2737
		38.4753		57.5241		27.6305		45.5675				46.2875				26.408		61.9535		41.8315		38.7648		34.6712		30.0539				53.2687		44.1531		49.9539
		28.5932		64.768		31.3229		43.9862				46.571				22.9567		53.2232		42.365		38.4714		31.0377		28.3683				26.031		47.5041		47.28
		27.6422		51.4526		29.6316		44.3878				47.4452				36.9335		52.4995		41.875		35.5287		32.0798		24.0821				17.9695		52.449		46.9141
		31.7375		56.3287		31.7575		45.8553				42.2332				34.1773		65.9268		41.0662		35.9629		35.3151		26.4035				50.5961		52.1931		51.1214
		29.5878		61.1646		31.0264		45.2652				48.0385				23.1978		54.2321		41.3424		39.2489		31.8693		30.7574				39.0299		46.3265		47.5531
		34.0883		59.5167		28.5749		43.6118				47.7998				33.3824		60.7578		41.9344		37.2743		31.9605		19.0117				18.8147		47.4634		49.2475
		26.3355		56.9861		30.6317		43.6095				42.3345				43.2806		62.4917		40.8153		35.8503		31.5654		29.0768				53.0002		48.9487		46.8064
		38.5405		60.9331		29.4463		47.4262				54.4994				39.7924		56.8717		40.7978		39.7527		35.2235		24.931				31.5416		52.0995		48.4584
		39.4473		56.5268		29.7181		42.0627				50.4793				25.3838		55.606		40.8005		35.8259		35.6631		33.5697				34.5175		46.5968		52.3866
		30.6301		51.4043		30.0028		45.7123				48.5018				25.6373		57.0466		42.2126		37.9357		32.1279		25.794				42.0282		47.0764		48.3989
		38.9722		57.8108		31.4042		44.1746				53.7719				41.0331		64.0088		42.0865		37.0438		34.9563		31.9968				28.911		49.384		48.4345
		38.3908		54.7395		29.8344		44.4597				51.9239				22.4119		53.4879		40.7308		36.4335		35.8125		19.6555				24.39		49.8341		49.3758
		29.3874		60.1097		30.9498		45.2669				46.8189				35.0143		53.201		41.1888		36.248		32.0772		25.8684				28.1668		44.4511		47.2188
		32.8712		64.5814		29.714		45.0843				46.4779				22.5364		53.2177		40.9156		37.7731		31.5173		30.7227				49.3956		45.6715		49.3343
		27.8845		52.4197		31.3175		42.815				45.0904				23.0313		52.806		40.7764		36.6733		34.6366		27.5174				30.504		47.4666		49.992
		37.5622		51.9509		28.9507		46.5589				47.8782				32.7536		58.9777		41.2951		38.7002		32.0853		15.1116				52.9251		47.7652		50.2555
		31.8359		60.2051		27.3952		47.784				54.5911				22.4734		62.549		40.8831		35.6092		32.0481		35.9168				48.2497		44.8694		45.9684
		30.4849		61.1866		30.092		46.0007				53.1618				41.7999		62.6659		41.7046		37.0735		34.8256		28.6027				44.355		53.45		44.2515
		28.0746		62.6202		27.8086		45.3572				44.3616				37.3868		53.896		42.3379		39.7346		34.3294		23.3626				34.5373		43.8886		47.1238
		39.4524		61.3987		28.5129		46.0437				50.0664				39.8681		49.1851		41.6308		37.848		35.5312		31.0858				28.3961		46.5765		44.6984
		27.115		54.3606		29.4092		44.2997				55.8219				27.6359		59.6504		41.3075		36.5306		31.2625		29.487				38.5479		45.9657		51.0113
		38.8399		56.0971		28.2189		42.5978				42.2865				27.814		58.1512		42.7942		37.4428		31.2468		18.9061				21.9782		48.9292		50.6869
		26.8766		51.4589		29.8008		45.8109				55.065				43.1871		63.114		42.3633		39.3543		31.089		29.0477				30.1717		49.4551		53.3712
		35.4077		55.1887		27.8886		42.8729				47.5528				34.7557		55.6406		42.0553		39.9924		33.585		34.1251				34.5067		47.8966		48.1786
		29.5248		55.7306		31.2621		42.295				46.2059				36.4334		58.6958		40.8312		38.3174		35.4386		21.9574				35.7598		53.221		46.2052
		26.094		54.0509		29.7486		47.2866				52.8741				28.2729		56.226		41.9706		36.802		33.4742		27.0884				50.3719		50.8321		44.6351
		38.9191		60.4026		28.6086		44.9159				45.4842				23.1407		65.8144		42.0113		38.9176		32.2299		29.7224				46.7025		50.706		44.4593
		25.0955		61.9184		28.048		43.9053				46.7145				33.9819		49.1447		42.5053		35.7183		33.9528		33.6765				19.2864		44.7494		51.0821
		35.8702		58.9367		29.9935		43.9182				55.2116				35.8019		59.195		41.765		36.2213		31.4729		24.2256				17.8254		49.4536		49.8911
		30.1818		61.8867		31.7842		47.4508				50.6151				23.0185		56.2416		40.5659		35.0811		33.975		15.4639				38.9907		51.8664		48.8653
		32.7258		52.0047		27.8038		44.5295				43.82				36.6488		51.2943		42.3031		38.2417		33.0101		15.7498				25.8279		46.9365		45.432
		26.7363		55.1665		28.25		47.3916				45.3994				30.9638		54.682		42.0196		38.8272		35.2478		19.013				26.9077		47.7151		53.2968
		38.896		61.5948		29.2151		44.2993				47.2016				40.0101		51.0463		40.6027		38.8484		33.6352		15.9448				50.4163		45.6282		46.418
		34.3973		64.9698		31.5295		41.3325				51.2253				24.8964		51.1864		42.3042		36.9686		32.3934		20.6638				51.2167		51.1444		45.2892
		39.4217		55.4353		27.8737		45.6919				49.8293				37.8294		55.9666		42.654		36.6861		34.9663		21.293				26.3122		48.9088		52.8923
		34.7089		52.1376		30.2704		45.2171				44.6743				31.4482		63.7365		42.2047		36.0582		34.4203		30.5697				25.8992		53.0673		51.5053
		27.9618		60.0567		28.1166		44.9261				53.5222				35.1681		59.5398		41.7777		37.4273		32.9932		35.494				28.8781		53.0414		49.3883
		33.761		58.4394		28.7794		41.3375				53.6196				36.3384		59.298		41.1388		36.1701		33.4745		20.4195				32.637		44.6755		44.3079
		29.5018		55.8461		30.9418		45.618				49.5288				26.3677		47.6766		41.8384		35.3229		31.6021		17.5304				52.2727		52.1354		49.2556
		27.1973		56.0714		29.322		42.0574				48.7123				34.3692		62.6503		40.8078		39.157		35.7343		17.6189				40.8511		52.445		46.2442
		25.2477		59.4038		30.2087		43.984				49.3102				27.7924		47.6724		41.3835		39.2632		34.9422		32.9483				47.2657		45.1615		51.7318
		38.8796		56.399		28.9261		45.0836				52.634				26.6927		48.8439		41.8237		39.7334		32.2841		17.2932				49.1392		53.0616		46.5857
		32.1296		60.2896		27.9517		43.5242				54.4504				33.9756		52.5829		41.6924		38.5291		31.1724		15.2022				26.4356		52.4736		50.2265
		26.6545		55.4028		31.3591		44.3588				41.5882				30.2166		63.5611		41.3449		35.7972		35.4433		19.2865				32.6806		44.0668		45.0668
		35.3717		62.768		30.5062		43.673				45.6402				28.5838		58.2382		41.0017		38.2167		32.1094		27.7154				35.8198		53.4349		53.1078
		36.8288		54.6337		27.9161		44.8673				52.4027				39.6079		54.7078		42.3582		38.2751		34.4518		34.6801				37.2714		47.3977		47.5899
		30.684		52.9931		27.8541		43.827				50.46				42.3217		65.0347		42.3214		39.9145		35.8163		30.5468				35.6394		53.185		52.6723
		39.2202		53.1345		30.8813		43.9342				42.1295				42.3642		64.9322		41.4264		38.8628		31.9193		33.1173				35.7403		52.0187		50.1806
		30.4028		50.3012		27.539		42.8443				41.9752				36.2921		53.0829		40.699		39.061		34.9089		26.4365				50.5629		50.1515		43.9673
		29.8024		54.9139		28.196		43.6765				55.4307				23.2603		63.3367		41.3059		36.4111		33.0779		32.9929				49.656		51.8812		48.3055
		36.2665		64.4041		30.5919		42.8756				45.9281				34.4027		64.2411		40.6313		37.2084		32.5113		26.2169				36.3546		49.8238		52.1277
		39.8198		59.1881		30.024		41.4026				46.5124				42.1215		65.115		40.9445		35.5351		31.3921		34.9588				22.8542		52.0758		47.3627
		30.7053		52.5891		27.5153		42.6654				51.0082				23.3077		54.1484		40.8928		36.713		33.0855		22.3376				46.8027		49.9529		44.8645
		39.9734		61.1369		30.2261		46.8578				47.2403				23.2063		54.0546		42.4118		39.0715		33.5888		33.5705				48.6434		52.9097		50.5337
		36.606		54.7864		31.1992		47.0157				50.9125				38.5641		61.904		41.4402		39.4814		32.5834		26.0188				48.1001		50.4603		52.2805
		25.3573		50.9701		31.7193		41.2397				52.6655				29.5227		52.8222		42.4504		38.5892		33.8584		18.6251				21.4821		46.0096		51.4428
		25.697		64.6293		31.6272		47.0793				48.1099				39.889		54.2349		42.5219		35.9109		35.1314		18.258				36.7434		50.2254		46.1544
		27.6213		54.9615		31.2419		46.395				51.5498				42.4449		53.4462		42.6107		38.5597		32.4416		24.8259				51.8216		50.7482		50.6751
		31.1909		54.4834		28.8815		42.7246				51.7472				43.7349		57.0874		41.4156		37.8453		31.7512		32.9459				46.7737		52.4507		49.3796
		25.4439		51.086		30.7798		42.9981				45.4904				39.0241		47.5678		40.7428		38.7698		31.6316		24.3236				37.3007		48.3476		44.496
		33.4732		57.13		29.907		46.7985				53.1053				43.6858		52.2187		40.6199		37.925		31.9357		24.1569				31.5508		48.8764		44.8567
		27.9811		51.9367		31.866		47.4679				52.0994				42.3006		57.6162		42.0458		35.4632		33.916		31.2736				18.5122		52.8378		50.5841
		37.7643		62.8844		28.9663		43.3327				46.212				35.2416		61.4363		42.1373		39.1359		35.3522		20.561				43.7417		48.5198		46.1486
		28.7012		56.2829		30.2611		45.4635				48.4974				43.3319		56.309		42.7089		37.9669		32.6093		27.4289				52.8316		47.8651		46.53
		32.3351		61.4095		30.963		43.1895				46.4401				32.5163		50.7413		42.3885		38.7029		32.415		22.8781				40.4708		50.0444		44.6252
		37.0108		64.9282		28.7095		41.4213				46.0029				29.0849		62.7797		40.6626		38.0634		33.374		31.3191				36.015		52.2989		43.9057
		37.959		55.4741		29.3367		45.0856				43.6255				24.3088		55.9689		41.4843		37.7825		31.9398		28.6714				25.6339		44.4073		45.9443
		28.2126		54.7444		30.621		46.8769				51.3684				30.6085		52.0059		41.8198		37.564		31.0893		35.3554				46.1404		46.2112		53.2568
		28.6278		60.1382		27.4729		46.1614				48.8086				42.0877		65.4246		42.4279		37.3674		35.1905		22.0016				50.7946		51.6477		46.3905
		35.1538		53.5364		28.2909		43.4287				46.1745				36.5488		56.7776		42.6994		39.0246		32.9369		29.3769				22.939		48.5308		48.2686
		33.908		50.2681		29.3447		45.0639				51.9546				31.9358		51.6155		41.4312		35.4769		32.4254		33.3716				37.4069		45.9363		46.0076
		29.9241		59.6033		30.8555		41.2735				47.9969				27.8398		64.6644		41.4797		36.9412		32.1456		26.0852				48.0928		53.1076		53.0696
		28.4961		60.1601		27.7914		45.2037				50.5018				37.9231		65.3081		40.6583		38.2933		33.7437		31.6494				42.1517		46.329		53.1119
		28.1042		60.8909		30.9177		41.4059				50.5003				33.865		59.5333		42.1404		37.8888		33.9662		21.1059				52.52		44.3163		49.3624
		27.262		63.9852		28.7788		45.9044				55.996				39.8426		61.4552		41.6644		38.2254		31.9099		24.2073				32.5454		50.8405		49.7038
		29.6977		63.7835		28.0063		43.3054				48.2051				23.2402		48.3952		40.8657		36.5019		31.547		32.9891				19.32		49.6202		51.9153
		36.7953		52.8703		30.4486		42.9973				49.8047				34.9184		62.4664		42.2072		39.5199		34.7341		35.9083				49.7611		52.3649		47.3369
		28.8818		52		30.5594		44.6083				44.7076				42.9117		51.7019		42.1756		38.108		33.1702		23.948				45.6486		52.7429		48.498
		36.9902		57.3243		28.4865		43.2462				45.2739				26.0669		65.2772		42.3364		36.3018		33.1637		26.1322				21.6628		45.719		50.0839
		35.7395		61.0767		28.9765		46.832				54.5769				37.9834		50.5649		41.5248		38.2901		32.2701		17.9178				21.5046		47.7896		45.3303
		27.0867		62.5665		30.842		41.9429				51.3121				25.4697		52.74		41.134		38.367		35.2479		21.676				29.7542		49.8119		46.1076
		30.3216		62.4964		28.4773		45.6409				43.435				43.1003		51.2429		40.7956		36.749		33.7431		31.4472				45.5423		44.0871		50.3707
		36.0523		62.9384		30.6439		47.5889				47.7997				42.7096		53.8607		41.1893		39.809		31.0032		32.8676				23.7508		45.6936		45.5546
		30.7835		52.7579		29.6687		45.4817				47.0511				24.3698		47.1288		42.0199		36.8093		35.3788		30.2081				52.563		52.6155		48.0574
		28.9782		50.1869		27.267		43.4093				48.8151				28.0474		62.2511		41.8534		36.1802		34.7826		19.8546				48.153		49.4521		47.9991
		39.9044		59.7256		27.4761		41.3351				50.0329				41.938		58.5137		41.1932		39.1059		32.206		22.0486				31.8077		51.5409		52.5419
		34.4983		55.4531		29.2594		45.1821				49.2325				24.837		53.4693		41.6582		38.6496		33.5814		28.2777				37.0938		46.5604		47.0251
		28.4868		62.9846		28.3408		42.5138				50.2324				28.529		64.7775		40.8154		39.3997		33.7426		21.033				33.9214		48.2438		46.5896
		25.1974		58.6651		31.8423		42.1262				49.2601				36.7858		52.5281		40.6076		38.3775		33.3131		22.7645				37.6117		50.9448		52.2287
		27.3333		54.3834		28.6855		43.1979				51.1137				35.6997		65.3033		41.2454		38.1982		33.7598		34.2888				45.5833		49.5904		44.5837
		33.4713		57.2255		29.2482		46.8243				45.1582				36.3261		54.8865		40.831		37.529		34.8678		16.4422				17.971		53.1928		44.3662
		25.4089		52.7108		31.8999		47.0149				53.4229				32.6131		47.0814		42.7915		35.3013		35.5092		29.9363				45.2626		47.2451		48.6544
		32.337		57.2927		31.7309		44.6733				45.147				23.1837		53.6229		40.9343		36.3102		35.0303		17.1718				30.836		49.3822		51.6057
		34.0148		55.3981		29.6526		43.9319				44.619				31.2471		59.753		40.8723		38.5623		31.3778		17.5745				36.9488		46.9794		52.5056
		25.8955		52.7292		27.7516		43.4217				47.3492				31.6413		63.7518		41.1003		37.8715		34.6955		18.533				29.4452		47.1526		46.436
		37.0136		61.6463		27.1934		47.3357				41.4921				29.9231		60.5618		41.9048		37.7616		32.5702		20.4789				22.251		46.1797		48.5771
		36.677		58.0506		30.7327		43.5927				46.6601				23.3882		58.0552		42.229		39.3563		33.3652		32.4586				27.3026		47.3172		47.5428
		30.309		51.9547		31.8615		45.4453				52.164				41.9249		50.0725		41.6559		36.4092		31.6888		26.5935				40.6555		52.1495		47.0218
		27.0103		60.7087		30.7867		45.8125				54.1887				34.6484		65.3734		41.2165		36.909		32.6937		33.3721				17.8407		48.2401		52.0965
		26.7976		51.2848		29.586		43.8207				46.3513				25.2526		54.6796		42.0621		39.2442		33.2515		34.0544				46.5124		51.7764		52.4359
		31.258		51.0888		28.5223		43.141				48.4125				37.8483		58.9709		41.1425		35.5577		35.7695		31.7977				49.0563		46.9633		49.4811
		35.5831		55.1235		28.3254		45.2085				53.46				40.365		56.0764		40.5313		38.6284		33.0346		17.7858				18.7388		44.0687		50.817
		38.9521		54.8643		31.9297		43.1109				52.458				32.4405		56.4689		41.4888		39.9054		35.6308		16.7734				48.7057		44.1124		52.4622
		30.8753		55.2153		31.6166		43.1263				45.8002				34.2039		52.0592		41.0121		37.8297		34.0997		32.0831				33.3244		47.1896		52.1806
		30.0173		51.3628		31.0412		44.4432				44.856				30.1854		55.4427		42.4422		36.073		31.0956		15.1842				34.3964		51.0411		52.6481
		25.6518		63.2079		27.3705		45.9455				41.7603				23.3351		53.9298		41.7278		37.2138		34.9826		29.8588				23.9205		47.8395		47.7086
		31.2557		64.9064		31.7796		46.9639				51.5099				30.4717		62.8003		42.4649		39.6005		34.6645		27.4539				47.8126		52.4465		47.4395
		34.0615		57.7327		31.2095		43.3879				55.2206				37.8399		53.4631		42.7945		38.473		34.1018		17.3322				49.1887		45.2344		50.2822
		31.4533		50.6032		27.1432		47.2354				54.9121				32.7013		63.8402		40.6022		36.9824		34.5474		30.7035				17.6755		51.9881		50.7135
		26.9862		53.7878		29.0939		41.7854				53.9001				29.4102		59.2602		41.7419		35.4937		35.8381		33.3163				35.5624		49.2755		46.3952
		37.979		54.923		27.9735		42.0143				49.0378				36.7248		54.1582		41.1934		38.3545		33.9424		25.2331				39.5127		46.2498		46.408
		27.058		63.1178		31.3318		43.5015				45.6539				43.2476		64.7085		41.6111		36.43		33.0375		16.1016				36.4514		52.0659		44.1628
		25.7501		62.5746		31.7096		47.453				48.6892				32.4444		52.4443		41.5182		37.8939		33.8088		20.3575				49.5902		46.0153		46.9666
		29.8424		50.4108		27.5801		44.4001				52.7075				38.8223		53.2873		42.794		39.0962		34.7957		16.5936				47.4028		49.9576		46.5487
		39.5572		50.5943		27.8697		46.8771				50.043				39.9016		64.8641		41.3696		36.5437		32.07		27.5314				21.6526		52.1095		50.82
		31.5348		52.1587		27.6926		42.1386				43.5312				22.8953		51.8033		41.0286		38.0712		32.104		25.7329				33.5767		45.4141		44.1361
		25.1489		57.8136		30.2886		41.8833				41.3514				24.8243		55.0918		42.352		39.4307		35.7823		15.5408				33.6059		52.5923		51.7615
		30.4727		61.951		27.0512		42.6604				54.6563				26.6067		48.8638		42.4203		37.7989		32.6904		20.8055				22.6463		49.5517		49.9562
		37.0874		64.1156		29.6984		46.0366				44.3751				33.9679		61.9319		42.5376		37.6618		33.7374		32.1811				27.7326		51.5338		44.2601
		30.5786		61.395		30.1307		46.003				46.4778				28.6314		50.1769		40.9219		35.51		32.9029		24.3285				38.6745		51.9238		47.1105
		33.9642		59.9114		28.9075		42.5512				42.7475				22.7754		52.4006		42.1674		38.7156		31.9078		28.2293				30.4047		47.4678		47.5378
		27.5875		54.1649		30.0569		41.8744				47.4293				28.0545		59.1222		42.3918		38.1099		32.2964		27.677				25.7157		49.8939		51.7301
		39.7324		60.1488		31.4047		46.0644				52.3198				43.2024		53.2768		42.7309		38.1165		34.9958		31.0296				27.9378		47.5979		47.1874
		35.6142		55.6777		28.6445		44.8411				52.5701				25.8067		61.3562		42.017		37.1143		35.1682		15.0584				21.8193		47.2444		44.2316
		26.1234		51.1365		30.8697		44.0545				45.7035				28.841		55.3226		41.2109		39.8121		35.9345		34.2806				26.35		51.4072		52.1404
		26.7855		64.3074		27.3819		43.8714				49.5387				36.4841		62.3703		42.6266		37.0732		31.919		16.7818				29.6995		52.4286		48.5302
		33.0968		63.3958		29.8658		47.3184				48.6705				25.8808		52.8992		41.0065		38.0035		33.7369		24.8259				51.5923		45.4495		49.6027
		39.2237		60.6597		29.9		41.5572				44.1678				40.7995		48.8963		42.0652		35.5501		33.6777		28.6871				44.1843		47.5094		48.8467
		27.5909		54.3955		28.6175		42.4237				54.671				41.1827		65.4463		41.8696		38.4704		35.7574		18.4424				49.084		44.7335		49.2213
		38.8102		60.1776		30.4193		44.4967				44.6775				42.9992		48.7236		42.4491		37.1932		34.3457		35.4982				17.3749		51.5417		44.9257
		30.7162		50.0814		27.9846		42.8593				55.1819				43.5137		59.0408		42.041		39.4395		32.395		35.9538				48.5234		49.7935		49.4694
		26.0479		61.4176		29.083		45.8437				52.5538				35.4013		47.2298		41.2867		37.3522		31.2432		15.6466				25.7841		50.3503		47.0017
		39.3307		56.6837		30.3934		44.8984				41.2726				38.4829		53.8056		41.9841		35.2803		35.3371		21.7755				47.6714		45.0871		46.2835
		27.4769		53.7229		28.7661		47.5656				45.1779				25.0616		59.2901		41.3577		35.2443		31.7108		35.065				23.5524		51.055		44.345
		31.2819		55.0346		31.4143		45.3325				42.1125				22.5816		63.3327		42.1357		36.5239		32.6827		18.1709				20.1174		52.9995		50.7748
		29.6105		52.7523		30.5979		46.802				48.5737				30.2616		55.6928		41.3676		39.0231		34.811		17.3951				23.7802		49.3883		45.6409
		34.54		60.7061		31.3868		47.7901				43.9401				36.2408		64.4847		41.6355		37.0416		32.9453		18.3009				26.7285		50.1078		53.3667
		26.2926		53.5516		27.6916		44.167				55.773				31.4713		60.1759		42.5751		39.6207		31.0091		35.3338				47.1906		53.2345		52.7764
		26.5771		55.5221		27.6664		43.6461				49.274				32.5455		61.3092		41.5637		38.5727		33.9559		21.5231				25.8689		52.5094		50.9941
		35.6298		62.8847		30.1476		44.2278				55.7284				28.8464		58.5424		42.4394		36.3054		34.1896		33.9994				40.3138		48.9482		46.3931
		25.8709		59.3387		29.4311		45.1576				48.3991				26.7883		48.645		41.9428		37.5965		34.8866		19.8981				52.6283		52.7028		51.8108
		32.1396		54.1704		30.7261		42.6316				53.5573				36.8226		50.179		40.6577		35.7999		32.0637		20.4517				36.2092		51.691		49.2106
		32.3238		51.9401		29.9996		43.6408				49.4403				29.7875		53.7203		41.622		37.9741		31.1102		27.2081				36.8229		47.7814		44.0117
		39.011		51.7227		30.813		42.1205				48.115				40.7997		53.9696		41.5843		36.593		31.5719		31.648				35.5032		50.2272		48.9323
		27.1665		54.7933		29.9638		43.5633				44.3464				34.773		58.1173		41.6622		37.7871		34.1534		26.8404				34.1959		46.0397		45.0804
		37.3157		62.0348		30.6228		45.5268				41.2655				28.7568		55.4905		42.6215		36.9133		35.1431		33.6516				22.9148		49.5161		49.7583
		39.8044		54.9009		31.027		43.8048				54.7016				25.9689		57.0069		42.4773		36.9008		32.0746		17.7155				22.4832		44.6123		51.7258
		36.1594		54.6961		27.5921		43.8344				43.9266				27.1347		65.9269		42.01		37.6968		33.6798		23.2118				26.8287		46.2525		45.2
		32.3106		53.1986		30.4892		45.8547				51.857				28.3617		50.8318		41.9163		39.1021		31.3452		31.8973				52.7776		49.6133		51.2622
		29.8257		56.9579		27.0198		45.3008				52.7811				31.1227		51.8263		40.5845		36.34		32.2238		33.0563				44.3461		52.1073		45.9066
		29.9648		63.5553		29.5403		45.783				46.9387				30.7287		54.4251		41.8546		38.2327		35.7118		33.8592				44.5503		50.0948		53.4759
		36.0385		60.5835		29.3469		41.6476				47.0137				29.7224		61.3011		40.9549		36.0358		31.4985		17.7662				20.5571		47.1652		46.0016
		35.8828		54.3828		28.5182		42.9556				52.6941				37.2094		60.9728		42.5904		39.0664		31.2209		15.3472				33.1937		50.4969		51.0183
		25.2289		55.5076		28.6624		46.9302				54.5103				24.1884		61.8599		41.1897		35.1375		31.1736		33.2973				21.3325		47.8619		50.6458
		38.6532		59.9206		27.1082		44.6374				51.3609				22.9963		51.3785		42.5417		36.1857		33.8208		22.22				47.5364		45.2092		46.5092
		27.5905		58.2556		29.8688		44.15				47.4651				22.5662		59.6163		41.961		37.383		33.4218		17.3838				32.2573		45.3111		46.301
		37.8591		56.5648		31.7099		46.3098				44.5246				22.79		63.0503		41.6219		37.285		34.3525		26.0514				22.6831		44.6579		53.2594
		39.9567		60.2365		29.6128		41.5462				41.4636				28.2403		54.8722		40.9509		37.9595		33.7261		26.3011				51.5377		52.7037		51.1765
		38.3913		56.5698		27.9382		45.2071				54.2509				33.1664		47.563		41.8086		35.1611		34.7654		21.0743				53.3418		44.5158		44.8938
		37.1522		52.9749		27.7904		47.386				42.0158				24.7975		50.2962		42.0963		35.2981		34.0943		33.4283				42.8186		45.2541		49.9137
		36.6536		62.4985		30.2274		46.1569				48.1604				26.2187		63.1162		41.0025		37.446		34.0834		20.6863				23.6512		45.6337		47.4956
		38.1993		61.0826		29.1636		47.5801				44.7544				41.7199		65.4956		40.7166		36.896		33.1348		15.3855				30.191		50.77		49.4549
		30.7943		54.5904		27.6669		46.6593				48.5648				28.7857		53.304		41.7065		35.5285		31.976		27.556				19.1493		49.4635		46.0489
		38.2467		62.0309		28.4461		42.3009				55.1253				34.0603		65.3595		42.4006		35.88		34.3427		33.5109				51.139		50.3434		47.7326
		25.2263		55.2111		29.0703		44.1601				49.307				34.5561		58.1142		42.0484		35.1355		33.7434		19.3193				44.5326		47.7665		51.1984
		31.6335		64.1606		30.1914		42.7305				54.753				22.5999		50.9275		40.9231		38.338		31.9286		26.0549				31.3322		48.9596		46.7189
		39.9545		61.1508		28.9082		46.4531				47.217				32.8855		56.5569		42.0433		38.1099		33.961		23.977				29.7061		48.6846		52.3061
		25.3019		51.052		30.6605		43.139				49.973				37.5132		52.7083		42.5032		39.7519		34.7522		30.8116				40.7014		47.5077		50.4809
		35.2734		64.7999		31.9615		44.4514				54.2977				29.9391		64.3692		42.3203		37.9979		31.2735		32.0207				40.0425		47.9779		44.615
		30.3119		56.5534		28.29		42.9945				52.5568				25.4673		61.9902		42.6661		36.5386		33.9325		30.1187				48.1052		48.6176		51.3979
		39.0166		60.7843		27.0698		42.7038				42.9993				40.6038		61.7461		42.0985		37.0188		34.1813		31.4182				46.9801		48.3916		47.9852
		33.6503		58.9788		29.038		47.4655				42.1643				33.3844		50.2089		42.5413		35.0008		34.3391		22.2053				24.3461		49.2929		52.5097
		39.3399		60.2204		29.0023		45.5024				46.0847				38.6937		52.2892		42.6213		37.129		35.6078		16.1097				39.574		43.9583		47.8437
		27.2315		57.1161		28.5611		43.6739				53.7011				37.3774		65.1075		41.8448		36.3474		35.7129		28.0597				24.1697		47.0853		47.5564
		33.5601		52.2319		31.6693		41.238				44.7179				32.5117		54.6348		42.6088		35.0408		35.3569		25.7009				40.0427		44.2962		45.0981
		28.6064		63.6846		31.4799		46.7942				54.9404				33.8413		51.4444		40.9526		38.1151		34.7419		34.6904				48.1034		46.8676		44.9403
		38.1837		54.8001		28.7774		44.6229				44.6692				30.2388		53.4963		41.6032		36.4616		32.898		29.8283				30.1101		51.4309		46.5727
		30.0921		51.869		31.7423		45.7468				43.0542				27.2833		49.7989		41.5951		35.4702		32.8047		24.1587				35.152		49.8693		46.2417
		26.9045		60.6354		31.481		42.769				45.3423				32.9161		64.66		42.2992		37.579		34.7822		23.7108				23.2281		48.1023		45.0015
		34.0219		53.6599		31.4018		42.5047				47.9182				25.8569		54.2184		41.2239		39.0666		35.0295		18.5441				24.4145		46.075		52.3315
		25.9182		61.0288		31.6671		41.4529				52.8234				39.1824		55.8212		40.5391		37.3026		33.5984		34.883				48.1091		47.6618		44.7449
		30.8676		53.6246		29.5999		47.0069				50.3369				39.018		57.7045		42.1267		35.1614		33.9193		22.6296				39.9645		45.2732		51.6619
		37.6273		57.1153		28.1322		42.6885				48.6908				33.8096		56.8192		41.9501		36.9734		31.3951		20.4757				51.8247		46.2681		47.444
		38.0195		57.8823		28.2156		43.6373				54.6061				26.4029		55.9397		41.5959		38.8564		32.376		30.1122				28.7921		52.4744		48.6796
		35.5373		55.1246		27.857		42.4574				54.4023				39.4006		47.5079		41.8361		36.0482		35.6872		20.7839				30.9594		50.1239		53.095
		39.6184		54.622		29.5817		42.7392				49.6533				34.3278		53.6892		41.0114		37.5881		33.7773		24.6174				49.2825		47.7959		49.5132
		31.5974		63.8893		27.2083		45.6054				49.8512				29.3722		54.4285		40.635		37.2235		31.6711		17.7125				29.4996		52.1954		49.7592
		32.5436		51.1297		27.5538		46.503				46.244				37.2863		63.1001		40.8409		35.6847		34.2416		28.3507				27.8836		52.6408		53.0111
		26.9352		63.0208		27.8685		46.3168				45.811				38.3929		54.4986		41.254		38.9429		32.3524		34.6688				17.1686		43.9069		47.0023
		34.0077		57.7686		31.7707		46.497				44.8753				34.188		63.362		42.305		39.3763		31.9356		32.2273				31.0514		49.0099		43.9062
		37.9216		52.1677		28.8402		42.1371				41.7639				38.5839		50.9953		42.2562		39.0614		31.2464		24.3699				20.4811		45.3439		45.2717
		35.7014		54.2754		29.1068		42.6587				55.5737				22.7084		54.9097		41.1698		38.6838		35.5366		25.5344				46.1782		52.3021		53.3033
		32.9092		54.8748		31.0553		44.3463				44.9707				42.0733		63.5856		41.9071		37.2153		32.1946		29.0661				32.433		49.1553		48.7616
		30.4081		58.217		28.4814		44.8492				48.2223				34.8158		63.0897		42.0333		36.9984		35.8947		35.2996				36.6547		48.2904		44.8144
		26.8991		58.4868		28.5621		42.7285				43.8883				36.6484		57.7916		41.3433		37.8268		33.5538		25.6983				51.1596		52.3387		44.5265
		33.4067		54.8214		30.1009		47.28				42.2771				34.5272		57.7149		40.5336		35.714		34.3736		25.7299				26.9709		52.0998		49.6752
		27.6189		56.311		30.8804		45.9055				43.7475				34.6804		53.6803		42.2909		38.0025		31.2687		35.22				26.9434		50.6903		49.4889
		38.3692		55.3806		27.8317		46.9484				49.5147				23.5886		50.2044		41.9518		39.2157		33.2767		16.5223				45.742		50.457		47.5557
		26.4578		62.0021		30.1004		41.8655				50.7913				29.2979		60.9941		40.516		38.453		35.5772		23.1735				52.8435		47.975		45.7579
		34.2839		59.4651		29.0929		45.6369				51.4193				27.1772		64.4096		42.079		36.4067		32.2907		24.1953				34.5567		50.5829		45.8741
		34.8859		54.9052		30.5752		47.5561				41.2727				24.802		49.1018		41.0091		38.7295		35.2419		32.8586				32.8654		45.5262		47.0087
		26.0374		62.8285		29.9693		42.2269				49.3747				34.4192		47.5719		42.3446		38.9773		31.0854		23.9086				42.2523		51.967		49.185
		36.7628		60.1164		27.029		46.2029				43.2333				33.8348		65.9075		42.057		37.2726		34.6885		26.3898				21.9712		47.2713		46.9684
		39.4565		53.415		28.5882		43.9233				49.798				43.0623		51.2676		41.619		35.7675		35.724		22.9447				28.9244		51.6171		46.509
		34.454		56.819		30.2659		46.7342				49.4273				34.1949		60.8288		42.0008		39.2316		33.1964		17.9428				46.0487		47.1004		45.5822
		39.4546		56.9686		27.9433		46.543				49.5725				26.2933		55.7942		42.1632		38.8619		34.7654		22.334				27.8389		45.5353		49.8478
		25.047		57.7072		28.6698		47.3235				50.4332				24.5745		64.6815		41.5049		35.0025		35.5945		26.0134				28.402		50.903		51.5877
		28.9977		54.5973		29.91		41.7805				49.4378				23.9944		52.46		42.7448		38.5503		33.9048		19.677				46.2341		45.363		46.2747
		30.5635		57.3557		29.3521		43.7003				41.9089				22.4352		58.8496		42.2781		36.5816		35.3899		35.3081				28.0482		45.0192		46.3242
		28.2252		64.02		28.5987		41.5762				50.712				37.2718		47.7308		42.4837		37.2006		32.39		27.639				32.8908		49.8733		51.1874
		35.2897		62.2431		28.344		45.8004				53.1085				30.3861		60.1571		41.2611		39.1122		33.1091		32.1532				40.9466		45.3965		50.8214
		29.2209		63.1499		30.9388		42.2938				53.3997				40.088		56.9783		40.8888		37.9783		33.7325		19.3585				48.7339		49.8101		46.7267
		34.1952		56.3323		28.2081		41.5888				48.6471				39.1368		57.3053		42.5543		35.5564		31.0217		35.4847				32.9886		47.4279		46.6779
		26.2743		50.771		28.0892		42.8123				52.6618				36.6389		51.4347		40.5357		38.4958		35.1115		26.2395				16.939		48.6942		46.1778
		35.9261		53.0769		29.3259		43.5881				47.9858				23.9737		60.4769		42.1812		36.9123		35.9413		16.9999				31.0125		52.1825		45.5659
		39.8815		62.9477		27.6771		42.6221				55.0431				27.225		47.3227		42.7326		36.9039		33.247		21.9797				44.9943		51.8539		49.3538
		27.1155		62.8724		29.2138		46.4215				48.107				26.713		52.4329		41.1347		39.9059		31.6387		24.8017				25.7443		44.0934		49.8307
		26.3945		53.5973		31.4136		41.8889				50.2054				38.8196		65.4488		42.7124		37.2804		35.8019		19.7398				20.9135		47.4566		48.1953
		36.8987		61.9242		31.5693		42.4975				47.2123				29.386		60.0593		42.3656		36.8936		34.4058		28.2223				33.9106		44.6511		51.8749
		30.0434		57.6484		28.1461		44.8739				43.6015				27.6267		50.1683		40.6503		35.5877		35.1147		21.1929				43.1394		47.5608		53.2112
		37.5349		61.4197		30.2363		41.901				52.238				30.7665		56.0508		41.852		37.6095		34.3537		35.2014				45.7802		43.9693		45.9966
		33.9339		61.4602		29.4302		42.2651				42.3464				22.4774		52.9614		42.3017		39.5003		35.7278		28.2669				34.7874		50.5272		51.4482
		28.604		63.1252		31.9729		46.8643				54.4621				24.8132		65.0452		40.8199		36.2752		34.84		31.9096				36.1669		47.7864		47.2024
		39.4459		54.9763		31.5815		47.398				46.5598				24.4764		56.9033		42.7138		36.5395		35.2463		24.711				21.4179		46.6783		51.1174
		33.1544		54.5747		29.8143		41.2579				44.2197				39.1499		56.5604		40.5067		36.8405		31.0219		25.0631				41.0891		45.0674		51.7506
		34.3213		52.4187		30.9345		44.624				41.994				28.0166		55.859		40.7055		36.1707		32.8779		16.7627				39.1891		48.7838		52.9524
		27.7577		50.1534		30.9828		45.1409				48.9862				37.2508		60.8382		40.5145		35.9865		31.8929		33.888				42.4897		46.8258		44.5529
		36.64		62.3631		28.5519		41.7083				55.9657				43.5201		59.6389		41.3203		35.723		34.8111		34.5507				36.5625		50.9149		52.9634
		38.5371		53.9342		27.78		41.407				50.5212				28.6214		55.0037		42.5806		38.4826		33.6953		31.7951				27.8097		46.0656		51.5313
		26.1633		55.5653		30.7174		42.6608				52.1899				30.7491		57.1998		42.7325		36.291		33.282		29.7017				52.1214		48.6235		51.6083
		38.9753		58.5249		28.4569		47.1956				50.0569				40.1052		54.2512		41.4971		35.7706		34.4445		30.438				47.874		45.6192		53.0309
		33.0052		52.4375		28.8579		43.959				49.8484				35.4604		53.1637		41.1153		39.7941		33.7527		30.8223				42.3352		46.2384		49.9539
		25.6874		63.2218		27.7645		46.1556				45.6497				37.1267		63.6563		41.7322		35.9704		34.2071		32.1476				38.3611		44.3339		50.1919
		28.9685		57.6766		30.4061		45.8288				42.1241				27.7472		50.1664		42.0262		37.8656		34.1812		27.1184				41.6685		44.0677		44.9845
		38.074		57.5897		30.5975		47.2272				45.2509				37.8569		52.1008		41.1335		39.6689		33.6036		21.9909				31.5539		48.5603		46.8919
		29.3361		57.5894		28.4075		43.8179				43.2348				35.6341		49.8327		41.4123		35.3234		35.2168		29.2817				37.3463		44.0324		51.0576
		35.3074		57.8273		29.5141		44.3349				52.2542				34.8831		65.4895		40.9015		39.3174		31.3382		30.169				52.6873		46.659		46.5085
		36.1707		64.6545		30.1533		44.9051				43.8118				37.4304		53.4082		42.4972		35.2829		35.6453		19.4797				26.9681		51.152		50.7218
		28.6175		58.2688		31.463		42.3338				48.1806				42.3093		63.4575		41.1793		39.1158		33.2261		19.14				22.1469		49.3687		48.3412
		39.6121		53.923		31.5876		47.1197				52.3011				22.4991		48.4546		42.7667		35.3556		33.7231		31.2805				27.3322		46.6389		47.9973
		35.9557		56.4621		27.6896		43.7081				45.7215				32.7213		47.8062		42.0444		36.1455		34.998		31.3468				22.0962		52.6789		50.1586
		35.7213		59.422		31.6963		46.0145				49.1135				22.5168		48.9487		42.3662		36.491		34.8449		21.3463				51.5446		50.1553		44.2251
		32.331		53.142		29.2255		42.1642				51.148				43.1068		58.1738		42.4106		38.7071		33.6309		34.6353				45.1728		45.9414		53.473
		35.9362		53.6609		30.1408		41.4629				46.1856				23.8971		62.5172		40.772		35.7394		35.1451		21.5261				22.3983		52.1422		45.0741
		32.9911		63.0567		28.7531		45.9913				53.8708				24.1261		57.5678		41.3906		35.6071		32.7709		27.9231				48.9788		43.8473		43.9694
		28.2254		59.2503		31.6276		44.6191				48.043				22.8342		54.9882		41.7501		37.863		34.4408		24.5255				30.2952		50.9593		52.1549
		27.0745		51.1521		31.5017		42.5888				55.5679				39.4502		54.4677		42.1394		38.6377		35.8871		17.7318				50.4267		45.0962		50.2276
		31.9039		64.0734		30.6693		46.49				41.367				41.815		53.6069		40.8492		37.5679		34.7973		33.7341				22.8919		50.5634		44.1696
		38.6684		59.1945		28.3271		44.1612				47.4718				30.8328		51.7694		41.1446		38.4679		35.2997		23.2467				46.2111		45.2182		50.5785
		32.6944		63.4535		29.5967		41.4312				41.3998				42.4756		52.498		41.5915		38.3531		33.2516		30.9365				24.1522		53.3962		44.457
		28.8823		53.8114		31.0518		45.8631				53.7069				40.6854		59.5617		42.3177		39.4026		31.9739		19.0779				36.1267		52.5941		49.1346
		33.868		62.8877		30.2586		45.8041				51.7151				40.0662		63.3689		42.3654		38.3596		35.0719		28.6506				40.0226		44.0049		52.2943
		28.8085		64.4232		29.9121		43.7887				43.9574				32.169		55.4895		40.7014		36.2912		35.743		22.9709				44.5517		50.4272		44.3781
		36.0516		50.5415		31.9896		44.9936				42.2418				38.1363		56.8682		41.6428		35.1201		35.6474		24.395				36.7056		51.0583		49.0231
		33.6215		56.6856		30.7868		45.7461				55.8278				30.2921		53.9671		40.6849		36.0571		34.9925		19.558				46.5351		44.229		48.1301
		34.3988		59.8353		31.3661		42.0867				52.0137				23.0794		61.518		41.692		36.036		34.0221		23.9823				26.4006		47.871		45.0891
		38.8542		54.4258		31.8145		45.1222				50.6551				38.4337		47.8162		41.5515		35.7979		34.5942		17.1837				37.4718		48.2403		47.842
		36.8959		51.6666		31.1549		45.2867				43.2464				35.9582		56.9589		41.9781		35.2731		32.0297		31.2581				29.7082		50.3055		46.193
		31.6238		54.5527		27.4905		47.4843				53.8159				40.9541		60.9191		42.3306		35.1539		32.1798		34.862				17.6057		52.0427		51.7787
		31.3414		64.2115		27.037		42.2826				49.3801				34.7439		59.8283		41.9409		35.67		35.3148		20.0297				22.9707		46.5751		47.4992
		32.2169		50.2677		28.0522		41.6542				46.6942				42.4711		53.9471		42.1356		36.5691		31.3478		20.5219				22.534		47.6697		51.0736
		28.7725		64.4013		30.9238		47.106				49.8633				26.6921		62.42		40.7308		35.4997		35.2168		15.4258				49.8782		44.8883		51.5259
		36.4048		60.7261		28.5169		41.4295				51.1831				31.3846		65.51		40.8804		36.0682		31.9225		27.9065				50.0615		49.2065		48.9533
		36.3382		59.3557		29.7272		47.1491				54.7416				24.2489		49.1068		41.9742		39.4661		35.1127		25.2616				22.9078		44.0465		47.8398
		35.7977		56.5988		27.2325		41.2802				54.9873				30.6404		57.4066		40.7109		35.1912		35.7368		17.1855				37.9972		49.3919		48.1703
		26.0821		59.0684		27.3716		45.3717				46.5413				34.8642		61.399		41.1679		38.8181		35.5817		34.9511				34.4118		52.878		47.5012
		25.8464		55.4609		27.7796		41.8638				44.0123				31.1596		59.9465		41.5846		36.0199		32.6652		28.4891				42.0528		52.5148		45.2032
		25.5357		50.3382		31.3354		47.6852				50.4445				40.6654		55.1196		41.4691		37.9099		33.8138		33.547				33.6298		53.2611		43.9658
		27.5607		64.1073		28.4143		47.1981				55.9162				42.0182		50.2006		42.1625		35.346		33.2495		23.8243				27.9966		50.8378		50.5833
		36.0954		55.9235		27.1236		41.9533				45.867				42.3703		60.7116		41.966		37.3032		31.1875		30.4419				19.2081		50.0643		46.4238
		25.9666		56.7912		28.8188		41.396				44.674				22.7109		60.8375		41.0462		36.2716		31.5382		26.2799				33.3751		49.4622		53.1978
		27.9342		51.6879		29.1496		45.7593				45.8099				42.7896		60.2985		40.7661		39.6521		32.6965		15.1948				47.5913		50.1819		46.0161
		36.4159		52.6437		29.4981		45.5358				46.8579				42.3527		54.6746		42.4567		39.2175		35.2943		31.1416				41.8514		45.6142		52.8367
		36.402		54.0627		30.9639		42.235				55.0454				43.4944		57.6738		41.7561		35.7509		33.2808		24.4266				17.2825		47.0885		48.3882
		26.5078		50.7523		31.6143		42.0726				50.927				37.1882		58.8584		40.6847		35.7878		32.065		16.3877				32.3639		46.9503		44.8968
		28.8457		60.0086		28.7701		45.7525				41.8216				32.9911		60.9643		40.5836		38.2806		31.5083		20.2681				51.8299		53.3411		44.8203
		26.778		64.6135		31.5094		42.356				48.1086				43.6628		54.2873		41.5817		36.3302		33.7486		27.0101				35.9856		45.0257		43.9885
		39.3648		52.8253		27.527		46.9178				44.6762				37.2892		58.4698		41.3504		38.5763		33.1571		27.6849				43.9072		51.2005		43.9086
		34.9498		59.3515		30.4005		44.2261				45.546				41.0259		55.652		42.4074		35.4964		33.4396		30.135				28.6416		50.9903		47.9808
		31.3002		63.0004		27.0417		45.5799				51.6366				28.8026		60.1932		40.9466		36.8597		32.2938		33.3685				53.3994		52.4442		47.8636
		37.1152		56.8078		28.7454		44.1238				48.2188				43.7067		61.8621		41.0517		36.737		32.15		17.1436				53.4277		49.6145		53.1249
		39.167		59.7182		28.7472		44.9008				55.8313				30.1032		55.1569		41.9792		38.137		32.8125		22.1934				22.9698		52.4825		50.6974
		32.2542		55.17		28.6455		46.6004				50.0906				22.6166		57.3005		41.6675		38.8762		33.5027		31.3403				27.6374		49.9191		45.8196
		34.5748		54.8413		27.7442		46.9616				55.1912				41.5865		50.4042		42.7201		38.7231		33.9083		22.923				17.5775		52.7357		47.4615
		35.498		64.4587		30.9824		46.1906				41.6288				25.7912		63.2099		40.7628		36.2619		33.448		20.8658				45.942		45.4241		45.8657
		35.6628		51.0773		31.0646		47.0805				44.3658				28.8912		61.5258		42.5008		39.1142		32.3223		18.1886				23.0184		47.7972		48.419
		30.9935		64.3713		31.4736		41.7542				46.3848				22.3503		60.9271		40.9307		35.8017		35.3168		27.6882				21.6343		43.8597		49.8571
		32.6659		53.6463		29.371		43.8589				41.3411				30.2375		48.0362		42.0976		38.5651		34.9508		26.721				22.1291		45.5902		49.8632
		27.5115		50.6341		28.6449		42.711				42.3288				32.697		50.2768		41.1577		36.8036		31.4065		18.1744				20.7269		44.3093		48.7498
		26.3063		52.8792		28.5399		41.4284				42.813				26.3052		51.7938		42.2499		37.4499		34.9144		15.8375				24.6121		52.72		45.8552
		31.0756		51.2847		29.8857		43.7657				48.1699				34.4473		52.0469		42.3077		37.4373		33.0029		31.663				17.8754		45.5599		53.3905
		37.2958		64.7082		30.4208		43.9273				52.0488				28.0321		52.4039		41.2139		38.6447		32.4535		18.2701				38.2495		47.7817		50.0672
		27.0216		58.997		30.1529		46.8761				45.1144				35.5734		59.5964		42.7237		38.4798		35.2434		26.4873				38.8955		51.7066		52.4378
		37.8291		62.8967		31.8318		41.327				49.0581				27.2125		54.5241		42.3583		35.4065		34.2937		21.4613				28.2262		47.8989		51.0143
		33.4104		60.4601		29.7692		45.4107				47.2305				26.9476		52.7815		42.0324		37.5671		34.4179		21.5228				33.7224		53.2152		47.6124
		25.6312		57.6822		31.5365		42.1852				46.5268				39.7347		49.061		41.5865		38.9775		35.5865		30.2039				29.1255		45.2425		46.7013
		37.0927		59.4763		28.9763		41.4149				54.1938				28.0239		47.5298		41.4811		37.1537		34.7121		28.6705				32.0482		49.4179		45.2437
		28.6405		61.748		27.1798		41.9351				49.2096				40.219		63.0066		42.5313		38.0872		32.0124		16.6739				25.9909		50.6926		47.5738
		32.8075		55.7221		29.5142		41.4485				43.2006				24.073		54.1697		42.0913		37.2236		33.676		21.5679				18.5592		51.9857		44.018
		34.1445		58.0385		30.5943		46.8922				51.4433				39.9949		52.6434		42.2833		35.7228		33.0241		17.8871				21.1597		44.7263		49.6056
		32.3379		52.7646		28.7992		45.5486				53.8323				41.9505		47.5582		42.0609		39.7776		35.8705		22.7072				26.8381		44.8122		49.3416
		31.3095		61.2759		30.4156		45.0439				49.9861				25.1382		56.4072		40.6003		36.0099		33.126		28.2252				27.7713		53.4325		50.3876
		27.1512		55.6785		31.4744		42.3558				54.0504				39.596		54.7533		40.5609		35.9038		31.371		15.6939				40.3194		48.2615		48.8616
		26.0264		53.1701		28.2295		43.9382				50.3933				41.3864		59.5828		42.0494		35.2716		34.4133		28.8863				45.3486		52.7888		44.3937
		29.768		59.944		30.6745		45.0485				55.8468				39.6657		57.5652		42.7898		39.4357		31.5912		34.2516				40.1167		45.5326		51.7396
		36.5721		55.7044		30.6789		41.6173				52.1525				41.7139		62.6002		40.8337		35.6799		35.1254		28.2092				26.6412		48.8147		47.9779
		28.7001		60.4064		27.1806		42.1952				42.7162				23.544		56.4364		41.5538		36.1184		34.3731		32.4014				37.0263		43.8551		46.5404
		36.7303		63.7211		27.2288		45.2172				45.8149				32.201		65.4875		40.5265		35.9492		32.3		35.9642				23.6521		52.7394		45.3133
		30.2354		64.029		27.2262		42.7182				46.2474				40.4776		47.4344		42.5825		36.8297		31.818		16.4215				50.4095		46.4464		46.5458
		38.8668		55.3437		29.0602		44.8659				45.2357				38.2674		57.6361		41.6082		35.9552		34.5276		30.6261				17.3601		46.7008		43.868
		35.7807		54.7277		28.5194		47.7271				50.6359				43.4273		57.4873		42.3767		39.5844		33.4195		23.7788				24.3678		50.8377		53.1374
		37.7814		52.6148		28.4246		47.108				48.7967				31.6058		61.9594		42.4361		37.714		35.4907		21.0216				34.7062		46.7746		48.1017
		33.5688		61.5852		29.7953		42.3963				42.9701				22.6307		55.2632		42.087		37.9785		32.4978		33.0012				53.3878		49.1666		50.2271
		26.5161		57.6037		30.1941		43.9694				50.4762				22.9732		55.4448		40.5315		38.5319		31.5073		16.2879				38.7196		49.5161		51.5818
		26.219		64.9942		31.2676		45.0052				55.1381				36.8866		53.4068		41.3704		38.7994		33.615		35.8816				52.3332		43.8737		45.7367
		28.7079		64.5652		30.3196		47.3162				48.9542				29.1273		55.2514		40.5941		35.0843		31.9634		27.6412				39.92		50.0921		51.5027
		25.7721		64.6671		27.5459		42.2021				43.6968				34.558		55.7346		40.7124		35.2522		35.6069		20.6858				47.7901		46.7484		52.5309
		25.0363		50.6005		28.536		44.4063				54.0821				29.5514		58.6656		41.9113		35.4122		35.6538		18.0391				42.7859		51.3974		53.3591
		33.3848		54.4008		28.2583		42.6731				55.492				22.5708		49.2495		41.2677		39.4032		31.9942		24.3383				17.2797		47.2203		45.1486
		35.6967		61.0907		31.8479		44.0657				52.5637				23.1499		50.0309		42.3823		36.9399		34.7172		25.7407				51.2698		43.8919		47.2319
		29.9952		61.0448		29.255		46.8534				44.6902				26.7812		50.653		42.7112		38.2179		33.9257		29.3875				26.9218		45.8563		45.1907
		27.1923		64.429		29.3429		43.8127				53.1513				23.2773		64.5814		41.7433		38.1577		32.5605		24.5758				27.4701		49.6615		45.2412
		35.9492		55.8115		31.5041		45.1705				54.2724				39.199		47.6019		42.0827		36.1417		31.1013		32.3205				29.1577		44.8551		51.2043
		29.016		52.8294		30.2992		41.4395				48.2448				30.9338		52.4205		42.3342		39.5025		32.5651		23.388				43.1072		50.1133		47.1584
		31.7864		59.0209		29.865		46.2978				55.9993				39.6259		55.7125		42.5875		36.463		31.2079		29.7721				34.7892		51.8792		48.8374
		28.2613		52.6566		28.8954		44.0937				52.0123				37.5674		52.2882		41.8946		37.8172		35.7609		25.3087				42.1746		47.9552		45.2067
		32.4699		52.8029		28.2256		47.1298				48.3673				27.9563		61.7213		40.5111		38.5179		31.4157		28.6032				23.3743		44.4553		52.3794
		37.0066		53.8022		31.0653		42.3009				54.7971				28.3626		56.0587		41.2295		39.0237		33.6375		21.6744				27.5589		48.0616		49.7458
		37.8452		64.7374		31.8022		41.481				47.9713				40.036		62.209		42.2606		35.059		33.2792		19.4325				38.4753		49.5472		47.6231
		27.5033		59.3875		27.0228		43.1661				45.889				26.6669		64.8452		40.9055		36.8703		33.9145		24.1208				36.357		47.3489		45.0066
		38.5397		60.2677		30.6565		47.5874				48.0895				29.4755		65.5911		42.2304		39.0884		35.3565		19.7484				24.5227		51.9077		51.4767
		30.8947		51.0348		27.0619		41.2051				50.0213				39.7841		49.5176		40.8388		36.3211		32.5488		16.5008				37.8529		44.4238		49.0238
		36.4659		59.1888		27.3394		41.7802				44.8504				42.1684		65.4593		40.7791		39.3557		32.8979		21.063				45.5475		50.462		53.1427
		29.5568		61.4703		30.6768		44.5905				41.4829				23.2699		50.3527		41.9634		39.6305		31.3527		29.7498				25.3137		50.5854		51.0438
		38.169		57.2835		29.974		45.979				43.4829				28.5076		51.9367		40.8718		36.2796		34.3637		16.4433				46.494		46.8307		49.6578
		26.7809		52.9048		29.5373		47.1984				49.7411				27.7289		52.0629		41.0108		37.9292		35.9517		21.636				36.7863		47.764		47.065
		27.9266		60.599		31.8134		42.1925				55.2579				33.6221		49.0536		41.2147		38.8195		35.9105		16.1077				51.5044		51.0406		46.9731
		39.5448		53.8154		31.0453		46.1802				44.5019				35.2631		65.5335		41.7493		38.163		33.802		25.5278				42.3313		48.6524		45.1029
		25.5882		55.1867		29.0358		47.7064				54.6144				27.9262		59.3145		42.5472		38.9277		32.1489		25.6862				49.0678		51.7456		52.2308
		37.8077		55.4299		28.6596		43.8645				49.9686				23.3684		65.2442		40.8095		37.7577		34.2942		35.5135				38.6826		44.12		46.6457
		36.3743		62.2401		29.1286		43.2012				45.1952				22.2314		55.9034		42.7324		36.8886		32.0101		23.5034				19.0552		46.8042		48.6783
		32.562		62.3099		31.0697		47.6028				44.4119				37.5028		50.375		40.6795		37.7125		32.3727		18.0012				39.8714		44.2068		47.9465
		26.2773		64.4442		30.3155		41.8782				47.5442				38.2064		54.2947		40.6754		35.874		35.1712		29.1453				31.1835		50.7398		52.3236
		30.9962		52.0082		27.6914		47.4054				42.5803				29.0323		53.058		40.8159		38.5128		33.6363		20.8165				25.8801		46.3819		51.8483
		26.0776		54.4887		31.057		42.3816				55.9925				27.4745		63.3651		41.3965		35.3146		33.6805		26.3608				17.3731		48.0293		44.9143
		27.1866		57.1266		27.8334		47.6073				47.8843				36.1185		63.1482		41.1157		37.4928		33.9235		18.6974				35.6266		51.2583		53.2611
		34.9464		60.3126		30.6215		43.3101				54.7988				26.5315		61.1251		42.388		36.7036		33.7266		31.8124				31.8166		46.499		45.5532
		28.4624		56.9938		29.3303		42.1545				53.6014				31.741		60.7759		42.2094		35.66		35.9146		18.3653				29.0307		50.6767		44.73
		27.5562		51.7015		28.9633		43.3606				55.3888				25.1709		49.2871		42.2861		39.4823		33.7381		25.6388				17.0496		52.8733		52.0378
		33.6627		58.7855		30.9116		46.0929				44.0077				34.6374		48.0414		40.8413		37.2584		31.9801		31.2272				31.1428		47.6714		43.9426
		29.3697		57.808		31.8623		47.3705				48.6174				32.529		55.1405		42.6984		36.8167		33.8809		26.7469				24.2978		47.7708		44.027
		39.622		54.9901		27.9944		43.3021				49.6593				38.7689		61.5812		40.6806		37.5618		32.8413		25.451				51.437		45.1241		51.7563
		33.5507		60.5446		31.3422		44.2516				50.7043				30.3192		47.3587		41.0566		37.9167		33.6105		35.9877				29.1966		44.1452		51.227
		31.4651		63.1923		31.1902		42.0242				44.9144				43.4976		58.8194		40.7895		38.828		34.4829		16.2144				18.484		53.3153		52.7558
		34.6225		63.7059		27.7266		43.638				54.029				29.4382		47.7469		40.9178		37.7931		32.9932		25.4418				36.5235		52.5471		47.8311
		35.6685		52.1854		27.1954		47.743				42.3098				30.3717		65.8713		42.6179		36.0729		35.8055		28.3325				35.7206		51.8412		51.9523
		37.7326		63.8057		28.3474		41.2099				50.1075				22.2048		53.9766		40.9873		36.0528		34.0517		27.7009				33.0899		51.3225		47.6014
		26.2332		64.2173		29.0947		46.8463				47.6602				36.7453		53.641		42.3922		39.2815		34.779		23.5613				53.4923		46.6064		46.5597
		28.7684		53.2267		29.1492		42.6566				53.8615				33.0871		47.0891		42.772		38.3117		33.6497		24.424				37.1086		47.6067		51.0864
		25.2232		57.6226		30.7478		47.1561				47.3654				42.7407		52.8652		42.2106		36.1583		31.0173		35.8508				17.7186		51.8262		50.9807
		39.7597		51.3309		28.8904		46.8583				47.6581				23.4479		64.8587		41.154		35.9057		35.0405		34.9164				17.6808		44.58		49.136
		31.8047		51.7171		27.1445		42.8334				55.7994				41.9258		57.2176		42.1173		35.1817		33.7346		23.3163				22.4357		49.7335		52.4384
		35.2578		51.2116		31.9492		46.4728				52.2128				41.8913		58.0833		41.027		37.4417		32.8159		18.3811				46.9097		47.7352		45.326
		31.0164		51.1864		30.9814		46.9276				53.7266				36.7209		49.0406		40.8083		38.7507		34.0887		35.2822				51.2853		44.6589		48.6265
		35.2247		53.7447		29.5636		45.5552				44.7354				32.8476		51.9291		40.8375		39.4942		32.6596		32.0282				52.5582		47.5288		51.8173
		27.9409		52.0544		29.6052		43.0878				51.0448				27.8577		50.7998		40.8158		35.3343		35.1867		24.7409				23.725		44.3173		52.8587
		36.7954		54.7254		28.0005		43.7535				41.7216				23.2855		62.3148		41.977		35.1968		34.4712		27.9697				43.6492		44.6584		48.3778
		32.2785		58.8766		28.5922		43.3302				51.007				24.6118		57.7066		42.6913		36.8965		32.5425		29.7935				53.0203		47.7135		52.9845
		27.0184		50.76		30.1865		45.5755				55.2863				38.432		57.2265		42.2464		39.9879		31.9948		21.6407				45.2271		50.2294		47.4146
		26.2202		51.859		30.2126		46.4501				47.0751				39.0437		61.0906		42.7104		37.9872		31.8325		17.9591				32.7741		45.8738		44.7389
		27.1927		59.4941		28.9137		47.3498				45.127				25.6827		62.2819		40.6855		36.7621		32		30.6735				28.5708		45.6215		52.0575
		38.9229		62.7258		29.1887		45.3051				42.1777				32.2566		62.7135		41.5334		39.2786		35.3056		20.3431				17.9816		46.1405		53.0707
		29.7322		63.8305		27.3521		41.6184				46.3471				31.2938		52.3432		40.878		38.79		34.5559		26.6315				46.1698		45.5366		47.8599
		29.4315		55.0543		29.125		43.4165				50.6024				24.1041		61.0951		40.5692		35.0637		34.6852		21.4174				38.0703		45.9979		46.0248
		30.0423		63.3211		28.1183		43.0001				50.9498				42.1123		63.7652		42.002		35.9233		31.0275		31.4071				52.1099		50.8957		52.8717
		28.5536		56.8624		30.8348		46.0087				46.008				34.0993		62.3172		42.4263		37.0832		33.0305		25.8978				50.6135		47.4268		47.3798
		27.8068		62.3162		29.7047		45.9276				42.7872				28.6022		59.8253		41.5406		39.4414		35.0345		17.8953				42.4956		48.398		52.1729
		31.6821		63.123		27.8298		47.0415				46.7312				22.4808		61.6553		42.5905		36.7895		34.1867		26.0705				40.4728		52.5492		48.4386
		29.9942		52.5257		28.1209		44.1341				55.7416				36.7197		60.4476		41.8814		39.3613		35.528		26.2121				48.8709		45.5232		45.2506
		38.564		59.117		27.6931		47.0238				50.8881				28.9968		59.6645		40.5317		37.4513		31.5968		22.7168				34.8238		51.7882		52.1761
		25.7372		58.1982		28.7124		44.8678				44.8439				26.3554		63.4111		41.1048		39.1204		35.2936		19.0663				35.6664		53.4014		45.5318
		25.5199		64.9072		30.8835		41.6407				53.2082				29.4194		50.0622		40.5909		37.3649		34.329		22.5612				29.0786		50.0048		44.4284
		28.6863		54.027		28.0598		43.3091				43.6068				43.3319		56.3401		42.0953		38.3895		33.9947		26.9938				41.5427		49.7657		51.8039
		30.7948		52.2836		30.9895		41.3103				51.3474				42.9531		60.0508		41.8576		35.3482		33.1058		15.1851				34.1209		44.4609		44.6064
		34.6486		55.6791		27.4451		44.0945				42.8269				23.0603		58.004		42.5788		37.2985		32.2651		29.3083				46.9369		50.0666		52.2816
		31.7569		59.5051		30.3409		43.3508				42.986				33.7773		52.1651		42.5552		37.6029		33.3059		30.3348				44.2153		53.4528		50.6886
		36.141		56.5005		28.614		43.0131				55.4193				24.7764		59.1341		41.8839		35.3249		35.8453		32.5951				25.3179		52.9188		44.6401
		28.1951		52.649		29.4112		41.2086				51.1895				37.1651		63.3716		40.67		38.7901		32.3544		32.2141				38.7893		46.6611		51.4771
		35.1846		51.1281		30.3506		42.6879				41.4925				43.6724		57.7525		41.8077		37.0367		34.4469		15.7345				42.0086		53.1645		44.4932
		26.7765		58.6534		30.009		44.8888				52.2628				43.5235		51.0467		42.3897		39.7164		32.3588		16.6357				30.2077		45.5467		51.4372
		33.2265		54.2184		28.9566		45.0336				44.1023				25.1431		57.8631		40.9679		36.9344		33.7124		32.3968				37.1154		47.4952		46.8146
		29.9898		55.041		27.761		41.9263				44.8844				25.0718		57.195		40.7264		35.0873		31.8181		20.2563				41.9692		46.4213		53.0302
		30.5978		59.3851		28.7481		43.1025				46.9075				38.0684		54.139		41.4156		36.2066		31.2706		35.2043				35.4383		51.1436		44.7093
		36.2536		59.0992		30.8872		45.9298				54.0543				41.6442		50.7205		41.8313		38.6597		33.2362		27.7933				48.7808		48.603		51.476
		34.754		56.6166		28.2777		47.5993				45.2122				30.3846		58.9637		42.2987		39.2169		31.5503		32.854				38.3971		45.9175		52.0576
		30.7129		61.5106		30.0719		42.0726				42.8242				37.9338		60.5811		42.7172		39.7431		35.0821		30.973				27.6898		47.5242		47.434
		31.7338		58.0519		28.1763		42.821				43.0284				31.7532		54.7367		40.6619		35.2933		35.8798		33.2357				31.3842		46.5737		48.9869
		39.7692		55.5165		27.9044		44.1692				46.5444				26.4247		54.5756		41.9058		36.2811		34.0521		18.5097				25.0074		49.6444		50.8147
		29.4652		64.0926		29.2352		46.7202				54.0297				26.7422		50.4288		41.4426		38.2843		32.3274		31.5918				31.2075		44.3351		45.7646
		37.8003		52.0796		29.7178		44.8154				49.2678				25.0207		60.432		41.633		37.5554		33.7519		24.3851				41.0615		44.6812		47.5991
		25.6608		63.943		27.9312		42.274				50.0228				33.4798		56.5013		42.5416		38.8016		33.3472		15.9771				37.1239		47.8827		51.0479
		30.1124		59.3985		27.8736		46.7926				47.7811				29.9463		59.7511		40.5044		39.8296		33.7467		32.9621				39.0883		53.0136		45.1874
		33.781		57.7811		27.6802		43.5688				42.7053				37.9173		64.7593		41.6908		39.9201		35.699		26.8127				35.9638		48.2927		52.1831
		28.9315		54.7462		27.6346		47.7086				44.6688				25.7393		59.7929		41.8656		37.3569		31.5403		31.5943				42.4234		51.6845		50.2391
		39.0685		51.6218		27.0649		43.1372				51.8006				28.3105		63.6507		41.3889		39.6154		31.4679		35.7395				40.174		52.9664		47.3647
		35.3618		62.7264		29.2075		44.8135				50.5394				30.0365		54.4779		42.5401		39.6112		33.699		24.3906				36.423		51.1932		52.358
		37.9289		61.6542		27.6911		44.6437				47.5436				41.4093		51.0051		40.7178		38.0604		34.8834		33.5501				18.0656		52.9946		47.6702
		27.8097		58.1402		27.6819		46.8459				43.6831				27.6912		53.6327		41.473		36.4399		35.6529		27.126				52.6742		51.3296		47.8015
		35.8946		63.7225		27.3607		43.3887				54.5867				32.8942		47.1402		41.6634		38.5575		33.2516		25.3729				36.1718		50.7026		48.4741
		25.6119		53.8975		29.8435		46.7875				53.4927				33.2086		62.9811		41.498		35.1752		33.1963		24.5213				25.3154		47.1909		43.9681
		25.5592		53.1034		31.0165		44.4248				46.135				28.2704		48.387		42.7971		35.5121		35.4584		20.9722				36.6944		47.6158		51.3742
		33.3343		57.7672		28.7627		44.9998				53.7256				23.4032		65.3586		42.0982		37.9872		31.2829		20.4494				23.554		44.7759		44.8669
		33.7361		52.2514		27.3542		42.2403				55.8888				37.0673		59.7743		41.3387		36.5717		32.0224		26.1684				18.6335		51.8849		45.1481
		39.0538		53.0316		29.8599		45.1386				49.9645				30.5431		62.8647		42.1593		39.7681		35.1898		27.2607				22.1339		48.754		45.9414
		36.3305		56.5981		29.9253		44.8242				44.1946				38.261		61.627		40.5078		35.9934		35.1153		23.8543				21.3978		44.6807		51.7641
		35.548		50.2369		28.0732		43.411				45.5352				22.8573		57.2225		41.1891		36.046		31.2117		27.8731				52.1395		45.1943		47.6279
		32.9255		56.8023		30.9456		42.7284				48.7321				25.1371		52.2135		40.9766		37.8937		34.5787		19.332				48.641		53.1305		48.8989
		38.4851		63.1376		27.2805		43.0004				44.5417				23.0703		55.9502		42.1486		38.2805		32.9316		21.7122				35.8734		53.4251		47.3202
		32.2818		60.8314		29.1042		41.5253				45.9809				32.1284		63.4239		41.3685		36.6825		31.4906		27.4337				46.0344		45.5946		50.3284
		29.9964		60.9835		30.698		43.7034				48.8559				41.4263		52.5477		40.5404		39.0917		31.9111		25.5578				39.2283		52.6682		48.6827
		38.621		60.2284		31.5831		45.2077				46.1512				36.6013		51.1389		41.2014		39.9922		32.3929		17.2392				50.9324		47.8948		46.1388
		36.8725		51.1643		27.8278		47.0753				47.6664				40.6169		63.4116		42.7136		38.1352		32.4002		30.4601				25.225		49.2464		52.5375
		36.9458		64.3252		27.8331		44.41				44.0096				42.3969		53.1699		41.0687		39.447		33.3766		25.7009				43.7102		49.8476		44.3172
		36.039		62.4499		31.4392		44.0826				41.3879				31.3415		51.2155		40.5022		35.204		34.3555		18.5621				19.9296		52.1607		44.3916
		39.3		61.7107		31.5644		45.6563				48.0999				41.0942		53.5179		41.0222		37.5633		35.6974		29.1943				47.9933		44.258		52.9069
		35.8427		56.5904		28.4831		47.722				53.8739				40.4068		64.6105		41.7386		39.4243		35.4655		17.3521				23.5087		49.1766		48.6987
		31.4115		53.781		31.672		47.5696				53.3347				36.9805		47.8192		42.0722		36.363		34.7992		30.3671				27.4124		46.1736		45.4654
		35.2592		62.4026		29.0932		44.5672				41.937				28.6469		60.5832		42.0957		38.6811		35.1064		26.5084				47.3017		47.3082		43.8374
		25.5665		63.289		31.9399		42.1419				52.0504				27.2644		51.1836		41.1384		36.3554		31.0039		23.0533				40.6945		51.001		49.0802
		25.8014		51.6919		28.3563		47.7064				49.0915				22.3315		59.6377		40.6279		35.8369		33.5859		32.6619				46.9934		45.4771		52.407
		28.9188		54.3211		28.3996		45.8072				42.4895				31.8126		56.4983		42.3107		36.4398		33.9588		35.2159				46.5186		47.9264		44.9232
		36.3331		58.5994		28.0131		43.3277				52.3011				24.6786		55.399		40.5684		37.038		34.5383		15.4382				18.9067		46.5883		50.4712
		27.6784		57.2125		29.012		43.0365				49.8262				22.4147		47.9979		41.4581		35.1584		33.1155		28.1829				41.6468		48.1626		46.8968
		30.2271		55.0889		29.189		42.0562				55.6622				32.356		57.2711		42.5872		39.3672		35.3787		18.6811				24.1257		48.8646		52.5453
		29.5687		52.79		28.5019		42.7633				42.6023				37.2771		57.3495		40.6899		39.2033		34.643		18.2717				47.3073		48.3425		52.7439
		29.8244		54.8052		29.2016		45.4298				54.2829				27.9455		58.1809		41.7762		39.8912		34.9032		24.9798				18.934		48.5624		49.354
		27.8763		54.3364		29.8575		43.1566				41.6916				26.1376		62.5092		42.4922		39.1607		34.2608		29.7628				37.9671		46.8234		46.2944
		27.4252		59.3167		28.8067		47.515				52.6429				35.5324		48.0302		42.1966		36.9796		35.4213		28.6111				53.0139		50.2519		46.5828
		30.5988		63.1906		29.4855		42.04				44.9875				22.447		64.2253		40.758		35.8404		33.0681		18.9538				53.4435		47.2536		47.3395
		27.0241		63.4905		28.5763		43.2625				53.7864				32.6186		51.37		41.6394		36.2066		34.2572		25.6974				51.6534		52.4131		50.9284
		25.0443		58.6531		30.8692		45.1349				47.7099				29.8807		49.3374		41.1079		37.1676		32.8377		26.3198				19.4589		50.143		49.2462
		31.3375		61.5401		27.2673		41.887				43.88				38.4505		48.4594		42.2219		38.2003		35.9054		35.89				43.8349		51.0063		49.2956
		38.856		51.3239		27.9451		47.4803				47.1654				38.7147		56.0708		41.6156		39.7637		34.8046		15.8196				39.6719		49.7967		50.2472
		39.8875		53.0483		31.4438		46.6672				54.2237				27.4587		51.4917		41.9548		36.261		31.756		33.691				48.7303		51.7103		45.2915
		32.5115		63.3844		27.1218		44.641				46.0496				24.0683		47.9649		40.7147		37.071		31.7465		30.3653				50.7941		50.2242		51.6029
		29.1754		63.6328		28.5759		42.7921				53.204				29.9813		54.4346		42.2583		39.4696		31.4517		33.5363				23.0399		51.8021		47.0102
		28.5357		61.0582		27.9209		43.2133				46.4904				31.8126		65.1166		42.2984		36.852		31.5459		18.5256				32.5692		45.9882		51.8874
		34.1464		50.7642		27.2799		47.1191				43.7339				39.3729		58.3051		41.5802		38.6612		31.748		19.951				49.117		44.6673		45.6998
		31.5256		53.5543		29.4552		42.5131				42.1785				35.8454		55.3769		42.1269		38.1402		34.7978		24.0092				18.7485		48.6454		50.1686
		33.8588		56.7055		30.3758		46.8051				44.8343				39.4136		52.9613		42.0063		39.3265		34.6743		18.899				39.1814		51.7119		45.2978
		34.3458		62.1532		27.9812		42.7213				45.0115				32.5813		64.9635		41.6663		37.6726		32.9364		35.5613				17.0074		44.7399		48.4432
		30.997		56.1699		31.4505		46.5912				55.4283				43.4857		58.223		41.17		39.3587		35.6995		27.7131				51.1543		44.8415		49.4734
		33.9267		54.9538		29.1973		42.5038				47.724				36.8882		53.5678		40.8732		39.9399		32.3451		34.912				42.5814		46.9839		51.0629
		39.4651		57.5288		30.0387		46.4177				45.658				22.5067		50.7832		41.5051		39.1165		32.0075		30.1719				33.4863		46.0798		51.4337
		36.3429		51.18		28.5771		44.7264				43.1887				43.6719		63.9475		41.714		39.7862		33.1092		24.7226				41.0291		50.5697		45.5016
		36.5111		56.8488		31.6445		44.9917				49.8178				34.4359		53.9233		40.5193		38.5745		34.0547		22.616				51.8813		53.1356		51.6125
		31.4927		56.8043		29.5337		42.8776				55.0618				29.7287		56.8879		40.8204		35.7965		33.5755		28.7533				40.4947		49.8342		50.352
		38.0304		56.7742		27.4084		46.1297				51.6174				41.4837		56.3457		40.6205		37.0882		35.074		31.6843				17.7373		44.1888		44.3651
		28.0782		61.1434		27.0221		46.8008				45.0656				38.1401		62.1388		41.3027		39.4336		35.5556		22.645				35.7885		49.787		46.573
		32.42		58.3482		29.7772		47.077				46.1943				36.6542		56.7463		40.561		36.3966		33.9959		26.0585				23.4864		50.1395		50.8716
		29.7501		60.548		30.2769		41.6055				47.1556				37.4955		55.4976		42.1224		35.3838		32.9137		34.4324				30.8405		49.5142		45.3815
		38.4643		64.0724		30.2199		46.5301				54.2127				31.359		62.3928		41.1629		39.0986		31.8078		27.1511				39.4337		48.9329		51.083
		39.8784		62.164		29.1152		41.3371				46.8299				40.5203		55.5776		41.9838		36.2335		33.6474		26.6037				27.924		49.1125		45.1512
		36.7071		62.379		27.5252		46.1122				48.4096				29.0577		64.4233		41.3382		35.3419		32.8565		30.2794				26.2366		46.2119		46.0115
		39.8888		63.6558		29.3517		43.8486				53.0056				31.9296		63.592		42.3496		36.6839		33.0722		26.283				38.8293		50.856		51.924
		26.9876		53.4269		28.5491		41.3077				47.0322				38.3672		52.5101		41.2674		38.6013		32.3744		31.1195				22.8206		53.0835		47.0208
		30.8347		54.6796		31.7534		44.9088				51.2972				36.1176		47.6705		42.1477		38.5395		32.0882		33.1964				45.3609		45.8918		48.674
		28.3662		63.9199		31.3465		43.3748				44.3916				24.4367		57.4811		40.9224		39.6271		33.9783		32.1027				44.9703		44.2163		48.3657
		27.0268		63.7223		28.0085		45.3704				49.1006				23.614		50.5217		41.7251		39.025		32.5753		24.4462				19.4977		50.5515		45.1773
		31.0005		50.6281		29.0913		45.8826				50.5845				38.4402		63.4613		41.217		39.6		34.0863		23.1946				51.1092		52.3896		50.0551
		27.2639		56.117		29.2369		45.88				42.9096				41.9355		56.8214		41.2366		37.078		31.7556		33.2847				33.5508		44.8665		50.4075
		33.666		63.8989		29.0305		45.2798				52.1411				42.439		52.6478		42.1656		39.0952		33.9323		29.9218				25.6452		47.1064		53.0978
		31.9541		50.0912		28.4622		46.0002				51.5606				39.9398		59.7333		41.0092		36.8561		34.783		16.469				36.1918		44.6165		49.8968
		33.6757		54.3757		31.5934		42.3469				53.7357				28.4484		63.5801		42.7243		39.5547		33.4109		21.8951				50.4147		50.4032		53.4384
		39.1474		56.9466		28.2374		41.6041				41.8559				22.9308		49.5365		40.5354		39.6896		32.1548		22.8274				35.8205		50.1348		49.2908
		35.1439		58.1838		27.5064		43.5143				53.5489				36.4337		59.2972		42.0647		36.8327		32.5995		19.9827				30.634		53.3192		49.0436
		32.3583		50.2119		30.6458		43.8359				48.2465				25.9338		55.7682		42.4312		37.9435		34.336		23.2567				44.297		47.1295		51.9523
		30.2162		55.0114		28.3361		41.2712				54.7723				26.9196		53.4675		42.0735		37.419		33.9591		22.582				48.1784		49.4114		51.7162
		34.6199		52.4886		27.6649		46.9873				55.8275				25.327		54.8675		41.7732		36.0918		33.7224		26.4803				17.7371		47.6466		53.1033
		25.7602		58.7798		30.1697		41.6356				42.6294				23.4479		53.1832		42.1708		39.7349		35.3233		18.1051				53.4216		48.5123		44.4164
		36.5589		55.0857		28.8501		43.5885				44.0495				22.4496		56.8009		41.1169		38.1875		32.1068		34.8843				18.6701		49.6904		48.2136
		33.0994		58.5642		29.2755		41.2934				41.7104				38.0795		62.8372		41.6817		39.5312		32.9483		19.0601				33.3952		46.4613		46.6148
		34.863		50.0817		31.2701		43.2227				50.1875				31.7335		52.4637		42.1588		35.5335		35.9625		33.5355				45.0632		43.8774		45.3731
		28.6133		60.9374		29.0211		42.0101				44.2743				32.4021		62.6489		42.1818		38.9302		35.7728		28.2351				53.1732		45.5824		49.2421
		38.8917		57.0903		30.1878		42.9328				55.9206				39.4479		58.3201		42.3884		35.128		31.4008		33.5251				20.6803		44.6302		48.4113
		32.2765		63.2139		31.2568		41.6093				44.2772				22.7599		48.4754		41.5877		37.9572		34.7623		27.7446				53.353		45.6012		52.0691
		25.6392		63.9821		27.36		43.9002				44.1222				27.2312		61.2424		40.5286		36.5077		31.278		23.6817				21.4127		48.4132		47.5712
		39.5707		52.3129		31.9582		43.692				49.2031				22.1636		57.1281		41.5069		38.8244		31.9682		23.8438				52.6353		52.9318		46.147
		25.4112		62.913		28.0598		46.8158				50.3188				39.7924		50.7202		40.7662		36.7592		34.9505		24.3637				36.0401		48.2935		47.4598
		39.9001		51.2491		30.3273		42.8291				41.2454				36.7957		51.0691		41.9809		37.74		34.8554		23.7397				49.5746		47.0753		53.3255
		30.6621		63.5318		27.458		47.7309				46.6862				41.9338		58.5236		41.5871		37.9935		33.1352		15.7833				29.9547		50.1424		46.0252
		32.4238		61.3036		31.945		45.2504				49.3642				31.7107		62.0811		41.718		35.7703		35.8061		18.0134				19.2725		45.4321		44.9826
		36.8065		60.9062		30.2444		44.2031				41.4246				43.2049		47.0867		41.0084		37.9952		33.9977		32.6079				51.3347		53.2419		50.2103
		34.6517		64.7728		31.0923		43.6192				43.1105				26.8327		60.6835		42.742		39.6501		33.8687		28.3668				25.0043		46.4049		48.3525
		37.9728		55.3276		31.2421		44.3422				42.9926				29.3847		63.8938		41.166		37.0106		33.9576		31.127				20.9205		44.1465		44.9983
		38.5785		64.7774		29.4469		42.7251				42.2333				25.7989		48.467		41.8859		37.8956		35.8993		20.6206				17.783		46.0589		50.497
		39.6776		62.6764		27.1546		42.8432				55.2465				37.3303		59.8148		41.3237		36.4404		32.6903		16.6893				28.1449		46.4149		47.453
		38.5056		60.6371		31.5173		47.2137				42.6877				37.8665		47.2038		41.8092		38.3102		32.8027		27.7993				30.4347		49.7022		44.692
		35.5966		57.5509		31.3816		42.033				52.2475				26.9238		59.9358		40.6548		37.7456		33.0679		28.1554				39.1911		51.3307		49.6229
		35.0754		63.589		28.378		45.9409				42.1072				43.5593		65.2068		41.6906		35.1893		33.5921		32.9988				40.2545		52.3768		46.3343
		39.5066		60.8872		30.5873		44.5321				55.6324				38.9418		63.5703		41.5244		37.5407		32.4779		27.3443				26.5954		45.6871		48.9692
		29.0944		55.7562		30.1772		41.4378				51.8228				23.8395		52.2707		41.0628		39.3468		34.1148		24.81				30.6659		50.2215		52.2149
		29.8361		54.8874		30.8275		41.5097				51.5432				41.9262		59.5737		41.447		39.8201		35.2555		24.3455				29.2185		50.0567		52.058
		33.6067		54.6535		31.1986		43.776				41.8692				23.5564		53.6197		41.5871		38.8162		34.222		16.3529				32.8626		45.7201		50.544
		31.1047		64.6909		27.9048		45.0471				44.2975				33.3785		52.4586		42.6955		37.6523		33.7691		20.3844				23.3073		48.2157		51.8662
		26.4456		58.2134		30.9748		42.2253				42.9257				33.3582		63.0303		42.7675		37.5508		35.3342		35.7725				22.6983		52.1733		46.5253
		37.5759		60.2039		28.2913		45.5848				42.2963				37.6142		50.8422		42.3554		37.5124		31.5464		33.7818				28.8309		49.548		53.3235
		31.3953		53.1525		28.8542		47.4482				55.5242				35.4706		57.3593		41.6212		36.0624		35.5355		18.2058				34.1059		52.3337		51.1112
		27.689		54.9648		27.1651		41.5083				41.4583				22.4275		53.9394		42.5766		36.8799		35.6048		31.0489				40.6394		44.5486		48.4611
		38.0182		63.8706		31.6843		47.1763				50.558				30.3601		47.3417		41.9746		37.3819		33.9942		31.6072				19.5223		53.1184		44.77
		31.6623		57.5517		27.2221		42.9786				43.036				31.2316		54.5118		41.9315		37.2231		34.7849		29.9339				33.2022		50.8958		46.8328
		31.1362		61.1953		30.076		43.9864				52.5968				32.0598		51.0502		41.0259		38.4119		35.6683		33.5409				25.5406		51.3618		46.4093
		25.1444		50.9275		28.3321		47.4807				51.6567				22.3756		59.934		42.7693		37.2823		33.1337		24.5153				17.4796		52.96		52.3456
		27.6071		54.5576		31.6308		43.8442				55.1643				32.1824		53.6449		42.4748		35.0903		34.5714		18.1397				26.5879		51.4377		52.5033
		32.3189		61.5109		27.5649		42.4397				42.3383				34.6799		64.2139		42.5035		37.0183		32.0104		30.4377				30.4127		47.162		51.453
		38.6017		51.2973		30.8984		44.84				55.6011				39.1443		60.9184		41.8698		35.2193		31.3433		27.3545				31.012		53.3186		46.2883
		35.1617		60.691		31.0851		42.3482				47.0047				32.2972		58.7596		42.0458		37.9018		34.9299		28.4276				26.1143		47.1344		49.2795
		36.8299		57.6914		31.3579		45.559				42.0367				24.2048		50.1849		42.4438		39.5808		31.8854		30.2265				34.2465		48.6141		51.71
		27.1111		59.5189		28.9976		47.727				47.6076				22.4071		57.3556		41.2993		38.8296		34.37		16.8893				17.1062		50.4373		45.5591
		31.3004		58.6609		27.6856		47.5859				42.9896				37.2644		57.0351		40.9699		37.7747		33.5701		29.241				34.0727		50.9008		50.5788
		29.3928		57.1241		29.684		41.2567				48.9485				42.1456		64.098		42.1793		38.6362		32.5542		26.6475				36.7211		50.028		50.7035
		32.0561		60.28		31.4075		42.3217				51.3361				32.2826		56.5358		42.1976		35.2697		35.9654		27.1467				38.0651		46.1236		50.4785
		34.8116		52.7618		29.8322		42.1275				44.1302				41.4553		62.4663		42.3033		39.4767		34.2712		18.9428				47.7797		46.6286		51.1278
		37.3632		56.0081		28.0077		42.6673				52.7579				26.5787		63.1798		40.982		38.9256		32.8154		33.8644				42.9184		44.747		52.3029
		37.6354		55.2802		28.5855		45.085				41.4034				39.9104		54.2957		42.267		38.8088		31.1898		17.9141				18.9613		45.4806		45.417
		31.0115		52.925		28.5593		41.9105				44.9206				41.6296		65.4032		41.9592		36.1752		33.9033		18.8523				35.5454		49.4845		51.0115
		25.6419		54.0087		29.6881		47.3215				51.4708				42.2986		65.7358		41.558		39.4569		35.0862		32.1908				50.687		46.7937		46.5669
		33.2677		52.8201		28.9198		47.2507				47.7205				39.7977		55.1114		41.7828		37.7994		32.8307		31.0256				52.9043		44.4611		50.8601
		35.0826		62.0442		30.1055		42.5442				47.8243				38.4477		61.7359		41.554		36.7868		33.6778		21.9387				31.8281		47.1936		51.5693
		35.7201		53.2451		30.1597		45.1778				50.0928				37.0348		59.2247		42.428		38.3707		34.6161		30.018				34.1911		50.87		51.1187
		37.4448		50.8538		27.1755		47.4737				53.2034				28.6996		59.5123		42.7095		36.0638		34.3433		15.4949				25.8085		45.7469		45.5393
		27.777		58.0343		29.4602		44.265				55.3358				30.9754		61.7338		42.3025		35.9576		34.18		16.1735				45.7325		49.6134		46.3744
		26.0275		64.3086		31.0819		46.6461				43.9686				22.6962		47.9852		41.9912		38.6812		33.5213		28.1506				51.393		52.7275		47.4548
		29.9022		59.2528		30.5532		42.9006				42.7782				27.8618		59.6172		41.4386		37.9311		33.0103		17.3884				43.6912		44.2772		51.6199
		27.5874		58.0277		28.0964		44.1109				49.5115				32.2077		52.7603		41.6157		39.916		35.6218		15.9636				46.6684		44.2675		49.1363
		37.5568		56.4498		28.6367		46.6549				42.9383				43.6008		56.8107		41.0833		35.9493		31.6702		26.6767				34.3535		49.2372		49.5865
		27.6677		52.5401		28.1871		44.455				54.1265				27.603		47.9206		40.8298		36.6363		35.6308		33.6342				26.5709		48.8947		49.7342
		35.6751		60.6208		27.4297		41.5141				52.103				34.1573		61.4286		41.536		37.2809		33.3955		31.1081				27.45		49.7537		49.748
		25.3058		57.2797		29.7112		44.5534				51.9619				39.5828		53.1876		42.6568		38.1677		33.1475		17.141				24.6216		53.0327		48.2855
		29.8369		58.7154		28.6579		44.3003				48.5306				43.2455		65.7216		42.6851		38.8886		34.0669		17.3376				49.2615		53.0119		51.2458
		30.0906		58.6562		30.6744		41.8475				50.4555				41.8494		61.5241		40.9411		36.7406		35.6331		33.0503				34.4376		46.5101		53.4851
		32.0037		61.0415		28.4367		45.2211				48.2637				28.8167		54.8887		41.3533		37.4288		31.3665		20.0978				29.5438		46.5741		52.0756
		39.1643		57.9381		30.0031		41.2396				47.4296				27.8329		64.7063		42.2244		37.9453		32.965		29.3577				52.655		50.2904		49.7477
		37.4757		50.4251		29.1868		45.6258				54.178				29.0006		65.2126		41.1264		38.8625		33.5988		30.4484				30.3857		50.4021		47.8706
		29.6748		62.4287		30.0477		42.0515				48.1929				24.863		60.0056		41.0461		35.106		32.1769		15.2094				52.7306		49.4838		48.7997
		34.3059		53.6184		27.0261		46.6505				45.8255				24.6944		51.7738		41.9583		38.7816		32.4719		25.8765				52.2173		46.4848		45.6929
		30.1099		54.2717		31.9735		45.9081				46.0738				40.5406		61.1728		41.233		37.0221		34.3638		33.2604				40.5398		49.4111		47.7725
		36.8844		55.1208		31.1908		41.307				46.3554				26.7895		55.7476		40.709		39.9147		33.0871		19.3424				18.0108		50.4563		47.3104
		26.5599		57.0607		27.3441		45.3752				53.1021				42.661		59.4441		42.6265		38.4452		34.2782		24.5708				27.1887		49.5516		48.2461
		25.7528		50.5118		27.1407		41.7506				49.4628				40.1422		61.6172		40.6622		38.6734		32.7769		18.7082				33.4471		51.4837		46.1009
		30.4085		59.3992		29.7151		46.5482				43.1718				33.6196		49.8682		42.4896		35.9451		32.1716		28.8511				43.3883		44.2988		44.1168
		30.0406		58.9449		31.7287		41.2142				50.7659				34.4166		65.7571		41.5882		38.6749		31.146		29.3654				43.2509		49.712		45.0472
		30.6012		55.8781		30.9761		41.747				52.7691				23.0742		57.8303		42.3508		37.9698		34.7051		15.6853				34.824		50.378		52.82
		39.1522		54.4013		28.4499		41.4752				51.3687				29.9981		56.4325		42.3077		36.0789		33.0971		26.8529				44.3783		52.9499		48.7439
		34.5672		51.1084		27.1603		43.3248				53.4389				30.8321		64.2108		40.873		38.4036		34.9413		23.9352				35.7346		47.8124		45.941
		26.7823		55.0432		28.0966		46.2862				50.2348				40.8767		64.4325		42.4448		36.8508		32.8455		25.7274				29.1309		46.2631		44.6964
		34.1955		55.3963		29.8622		46.2736				47.3388				25.8858		52.8403		42.2528		38.0621		33.6866		17.9538				23.9861		45.8068		47.1718
		27.5085		58.0266		28.1538		47.0791				46.6503				26.4783		51.006		40.5832		36.7513		33.7954		22.5044				22.0981		47.4097		49.5597
		34.2096		56.0323		30.6697		46.6311				50.5266				23.5334		57.5936		42.2691		38.7501		31.0484		19.0506				44.4475		49.5242		47.4012
		39.1647		58.8744		29.6715		41.796				41.9834				39.1859		65.0971		40.982		37.5678		34.5249		21.2056				47.1034		52.5247		47.5289
		29.6885		52.6073		27.5054		45.2437				42.6787				26.7337		63.9131		40.5083		38.2369		33.94		16.148				42.6662		49.5961		45.3591
		37.1638		58.4868		31.1559		45.8546				46.2418				39.9584		64.5555		42.3843		36.4977		32.6346		30.5527				38.4527		48.2682		52.0724
		33.5933		56.7556		28.3019		44.5698				44.9218				34.6443		59.3556		42.3724		35.799		35.8111		34.7766				52.2763		46.4372		52.3123
		35.0171		53.6029		31.9705		46.8303				42.7463				26.0681		53.0825		41.5192		38.6933		34.8044		17.651				32.8189		46.1527		44.713
		38.6674		50.4166		29.3845		42.9053				55.5279				27.6715		50.3287		42.3195		39.8477		31.3699		26.4734				30.7564		49.1811		47.586
		27.283		58.9915		30.4907		42.2434				45.5408				36.4788		49.7998		41.4177		36.712		34.0016		17.367				47.179		49.6392		48.9049
		25.825		63.6012		29.5531		43.5637				41.5792				41.5079		54.8203		42.3749		38.5224		34.0883		29.787				37.587		49.254		52.142
		27.2042		62.008		27.574		42.4234				45.414				35.9393		55.1899		41.652		38.6148		32.6309		29.3708				44.3634		48.122		47.7837
		25.7309		59.899		28.6409		45.0096				54.6546				30.1589		49.5138		41.6402		35.1394		34.5533		17.837				48.1364		52.862		50.5864
		33.8166		56.1247		31.245		47.2675				53.0795				24.8272		53.2565		40.5026		39.5598		35.2545		27.0566				18.5864		53.124		48.2654
		34.0728		51.9182		29.8023		45.3145				45.4007				39.5083		60.7221		42.2121		39.2058		34.7374		17.946				20.7486		52.8801		48.782
		25.1213		62.559		31.2872		41.4423				53.345				34.3917		53.0295		41.4383		37.7443		35.6427		22.022				40.6833		53.2501		48.7935
		34.0078		53.2051		29.7084		45.3574				49.132				24.4356		49.3228		41.3003		39.3278		35.1027		24.6992				49.8438		46.4412		50.3093
		27.5376		57.4017		29.8621		41.5587				50.8447				29.164		62.216		41.4875		37.8256		35.9314		33.2924				31.5643		52.1745		49.4549
		27.4111		51.1934		31.0465		45.227				55.7622				38.3757		58.0586		41.8386		38.2358		31.7251		21.3797				46.3801		52.0611		48.2562
		32.3589		57.1359		30.3412		42.7643				54.1264				26.4478		58.3114		41.2884		39.0578		34.4303		19.5901				41.4925		45.3313		53.1039
		36.5306		58.5021		30.5681		45.0417				43.8082				43.3913		61.48		40.5308		37.8107		31.2774		26.0227				23.5727		45.3543		44.4328
		27.3658		64.4259		27.6985		43.6054				48.9732				38.1483		53.7813		41.6467		37.9427		33.2531		28.4616				21.5422		53.1997		46.4974
		38.9577		63.5574		30.0461		42.7011				45.5868				27.709		59.754		42.2757		38.9394		35.8896		16.9977				40.3519		46.4831		46.7841
		25.3316		59.1091		27.2757		47.3368				54.9243				29.5112		63.8118		42.445		36.3039		35.6753		19.5801				23.5014		44.1124		50.559
		31.4612		52.3843		29.594		43.5238				43.755				42.6304		62.6336		42.4099		38.1531		33.2547		16.4759				24.7725		49.6769		49.5132
		30.7239		60.6085		28.988		45.2112				48				26.0923		57.0258		41.1482		37.2246		35.1561		17.4988				30.5879		45.9762		52.726
		39.5517		60.3535		29.4453		43.558				50.4954				24.6607		53.4287		40.8039		39.8609		32.5454		20.8112				24.8191		52.988		49.8491
		25.0468		53.4186		30.2451		46.9902				44.0757				24.246		55.0051		42.7556		36.5926		32.158		26.3569				37.1178		51.2357		52.5304
		31.3897		58.9438		27.1329		47.2846				52.9229				40.9402		55.2382		40.6871		38.6334		33.2548		34.5491				30.6189		50.6981		50.3894
		36.8268		55.3774		29.9135		42.8592				51.7057				40.1978		52.6779		40.5422		35.8752		33.2362		18.0801				28.6453		52.4658		53.3326
		34.1735		60.7636		29.2344		45.165				43.0095				39.2382		59.3531		42.3629		39.7639		31.0226		16.1348				52.1757		51.5633		45.7076
		25.6415		55.1396		27.872		43.7868				55.2417				35.8443		64.5499		40.8647		39.2154		32.9369		35.6547				36.1632		50.2218		49.3533
		33.0837		59.2906		29.6569		46.8101				43.6724				33.1924		48.0443		42.758		38.5775		34.4924		27.5992				39.0851		48.5747		44.8478
		29.4358		57.2198		31.2148		43.9381				53.4637				22.8908		58.1585		41.5951		38.7113		31.0285		34.9218				20.4641		45.8438		51.039
		31.5203		51.666		30.0474		42.6001				45.5441				41.0101		58.8875		41.8213		37.6772		32.9169		17.988				24.0281		44.2593		47.5592
		25.546		50.3984		30.2717		43.0768				43.5404				29.3993		49.3566		41.4355		35.706		31.4812		18.9579				41.7158		50.2562		53.3626
		36.415		54.4629		27.8607		44.8499				50.6113				36.706		61.1883		41.5944		37.5477		31.0581		23.8047				29.7886		52.4376		52.1318
		35.219		59.051		28.1335		41.6822				46.3201				31.0851		58.8996		42.2137		37.8743		31.7605		33.8476				26.2703		52.755		43.9237
		30.9998		62.7821		30.5678		42.8613				54.6819				36.3215		49.1353		41.7224		36.7879		33.9378		33.7614				24.688		47.0487		44.2014
		32.3814		58.6027		30.3394		42.4632				51.3039				29.0518		64.7135		41.5982		39.2737		32.934		27.1316				30.291		45.3026		49.7642
		34.7017		58.6158		27.9731		44.632				47.6432				30.4722		48.7289		40.9915		36.4688		31.3752		15.4979				31.8433		46.7931		48.9524
		26.7117		52.117		30.3672		46.1051				49.325				23.1309		48.925		41.3835		35.048		32.8734		24.8247				20.796		51.3603		46.403
		35.8894		60.887		30.7796		45.7579				48.2687				39.6417		53.0451		41.3958		37.0662		35.5487		28.8282				27.0103		49.3818		48.1531
		34.815		53.2246		27.8337		46.186				42.6198				29.444		57.8592		42.4071		39.0019		34.2736		15.7536				26.6296		50.3289		45.6063
		28.9566		52.9024		29.9358		43.3111				44.3186				26.7977		63.4018		41.7651		39.8748		35.2683		25.7942				23.8812		51.4071		53.2221
		26.3227		53.2537		27.5045		41.2094				48.1956				41.2678		62.2258		42.2305		35.8394		32.3617		30.8602				48.2077		48.3579		50.5216
		32.7959		57.8117		30.41		45.4218				45.7892				27.6875		56.2926		41.4335		35.539		34.8259		32.2953				21.4126		52.9893		53.0909
		25.9064		64.6858		31.9784		47.6623				42.3723				32.495		52.0894		42.3476		38.4516		34.3707		16.0913				17.8398		45.3858		45.1544
		36.0119		52.8547		30.4536		43.047				44.9082				39.3582		55.725		42.027		35.8068		32.8053		33.8612				17.3412		49.112		43.911
		34.6363		58.0226		29.3997		44.6241				51.2959				32.6017		51.3739		42.7469		36.5475		31.7014		24.9937				52.9287		44.2343		53.3358
		39.4119		62.3108		29.6684		41.6572				49.1955				23.4182		55.6986		41.0516		36.105		32.1385		32.3858				49.4608		46.032		44.6893
		34.2106		60.3645		27.1814		43.3155				45.1421				36.2966		58.9665		41.3214		38.5705		31.2774		23.7054				50.1757		45.9742		47.11
		39.5951		54.5402		28.2219		42.9749				49.023				22.2401		64.2302		40.9278		36.6964		35.0841		18.1504				26.4625		51.5534		51.592
		33.109		53.6257		28.1247		47.0537				49.762				28.9869		63.7551		41.7251		36.5705		34.3526		26.2123				51.7189		50.3731		46.0384
		32.9275		62.9394		29.8593		46.4956				49.7216				28.4529		61.1489		42.5739		39.0216		34.4178		20.6334				30.4975		45.4978		45.0099
		31.5755		59.0082		28.0697		45.9141				48.8944				43.2472		50.8152		40.8187		35.7072		31.4457		15.8828				37.7734		52.7044		49.0831
		28.2824		63.4599		27.2856		41.9392				44.1731				27.1092		63.7445		40.5337		39.6178		33.3289		27.4328				22.5047		51.7628		49.5891
		27.1619		59.8729		27.6766		46.3019				52.8088				36.117		52.7612		42.2831		35.973		31.9623		15.1574				36.6442		49.8373		44.2371
		30.8564		54.2935		29.6574		45.569				44.7804				40.7761		59.3528		42.1873		37.6972		35.1201		21.1541				29.1767		45.7622		46.4469
		32.6437		56.0292		31.6026		43.2049				45.4783				36.7185		63.2926		42.6739		35.2128		33.1156		28.074				37.9071		48.8683		47.0288
		29.7968		60.3324		31.8506		47.3434				42.3881				27.3252		63.6696		41.1084		35.6083		35.089		35.3917				50.3184		45.0207		46.4855
		27.06		50.524		30.6622		41.7355				51.039				29.3824		63.5954		42.2583		37.2315		31.3981		15.3333				22.3515		47.0096		45.0802
		31.5472		56.2616		28.8759		44.9787				47.2125				27.5051		47.8317		42.5966		37.4916		35.8432		28.3325				18.5085		51.4842		51.9351
		26.2937		54.8931		30.6639		44.1025				46.939				33.3849		58.771		40.5829		39.2295		35.3939		34.7692				33.5148		49.2424		48.1746
		25.4203		55.4059		28.2582		45.1777				42.198				33.9764		53.7397		41.0661		38.6653		33.0712		35.7184				23.0941		44.6701		50.7349
		38.4473		59.0529		27.1421		45.27				53.7142				35.8589		65.0524		41.0889		35.0384		33.127		21.3048				31.3619		50.0755		44.9261
		26.2141		52.0066		30.7181		45.7764				54.0304				37.1983		52.4372		41.5806		37.954		33.5423		18.3502				39.3181		45.1546		45.0868
		37.7726		56.5654		29.472		46.195				46.7976				24.7257		58.2928		40.5977		38.2193		34.6351		35.5367				43.6602		49.8282		46.9759
		27.1027		60.2336		31.2784		42.7096				49.3829				34.4721		56.6396		40.6908		37.2515		34.7825		35.189				22.8246		47.3985		53.026
		26.3488		63.4206		31.8447		41.2493				42.9437				35.5353		51.1858		41.4503		37.4802		32.0019		27.053				44.3442		49.8511		43.9622
		30.6294		64.9466		27.3631		43.4409				45.6829				38.776		61.1604		42.7686		37.9276		32.6731		22.9524				48.6601		51.6853		46.1852
		36.983		58.7258		30.7127		41.322				50.1096				23.5529		61.944		41.6803		36.7139		33.9786		15.7719				43.6307		52.258		45.9184
		32.5308		60.5183		27.3614		43.6755				45.09				40.3516		60.16		41.595		37.3607		31.1821		34.2367				52.2974		52.9599		45.8777
		31.5244		62.316		27.5335		47.3911				48.0933				36.6931		65.7047		41.2249		37.5369		32.6055		30.3495				25.2412		49.4393		44.0113
		31.6802		63.4822		30.3413		42.7414				55.8914				35.7958		48.8737		41.5535		37.5989		34.8507		24.06				31.1642		46.3143		52.8687
		39.2939		52.8259		31.1478		47.0059				51.4814				30.0453		53.1595		41.4013		39.9195		34.4145		18.7089				22.6627		48.3822		48.6405
		34.1965		54.5438		27.2264		46.9924				46.3498				41.7498		49.3105		40.7974		36.637		32.0171		33.2648				52.3305		50.9197		44.8973
		29.709		55.798		30.6648		47.147				44.8809				24.5032		47.6096		40.8262		39.1661		32.6245		25.3418				35.1827		44.406		46.741
		25.9131		64.454		28.2468		41.2299				42.2883				34.6773		52.587		42.2935		39.2729		33.8228		24.0056				28.5154		49.2097		47.5622
		37.3912		62.6871		31.782		41.9709				51.7613				27.5647		53.5023		40.5245		39.3545		34.9026		19.3807				35.2777		47.3715		53.2726
		37.9562		53.2424		28.7333		46.4538				46.2163				29.1774		65.4505		41.7105		35.0766		32.2356		20.8211				17.2062		45.5201		47.3959
		35.9273		55.1153		27.6607		46.9871				52.6499				33.747		47.363		42.113		39.1009		32.948		35.4595				48.4039		46.3499		45.7342
		28.9853		62.9314		30.4663		44.886				43.0629				32.7871		64.9208		41.7559		37.6311		33.1609		32.079				25.4421		49.3973		48.1511
		37.5658		53.3556		30.4669		47.4865				49.9045				27.5135		59.7783		41.0812		37.4363		33.9208		32.5526				40.9556		51.6651		52.8679
		32.4644		53.5402		29.6338		43.5476				47.3915				33.9773		60.3653		41.1491		38.328		34.5267		17.2821				21.4219		48.349		44.135
		39.4915		55.8334		27.7582		45.9432				44.5017				22.6489		59.2504		41.0155		39.6076		34.4021		32.4073				41.7269		52.5502		44.1051
		36.9827		63.5955		29.4477		43.4916				55.2056				43.4106		51.1723		42.6359		37.5632		34.421		15.4165				44.5796		45.0932		53.217
		27.5302		60.3639		29.7735		45.2631				50.649				41.57		50.5393		41.257		36.7192		35.1373		15.9693				19.9338		44.2639		49.7734
		25.4824		50.6545		27.9269		42.5634				48.8812				26.7077		49.7447		42.3826		37.6721		32.9478		15.4062				32.0997		46.7832		44.7552
		31.6125		60.3474		28.2881		44.5658				44.8525				34.0621		48.1799		41.757		37.6346		34.1285		15.4777				40.4626		51.2429		43.9759
		27.2561		62.6562		30.4818		47.531				53.8034				32.6427		56.4954		40.8437		37.0527		34.0648		29.0102				42.5519		48.3897		50.4456
		26.436		54.0667		29.4862		44.7623				42.2192				37.1227		63.9078		42.1042		39.9482		32.2216		31.1587				47.2855		50.4401		50.5166
		25.0886		61.33		29.8809		41.4509				50.9134				30.6082		50.6715		42.5702		37.3797		32.8932		16.8073				31.4147		52.0404		52.9563
		35.7455		61.0307		29.2358		42.4379				47.238				32.0207		52.2105		42.5131		39.4436		35.3736		31.6956				42.8405		44.3387		48.1548
		32.9489		54.1798		28.0251		45.281				47.7276				42.0202		65.6636		40.6115		37.2418		31.2369		28.3878				33.2454		52.6132		45.6532
		33.8615		50.3192		29.6212		46.3952				49.3347				35.4514		51.8266		40.7137		39.9446		35.0765		22.4828				47.8235		49.6301		50.9005
		34.4806		64.0112		30.0361		45.4449				51.3123				31.1751		65.5274		42.5196		37.0136		35.1442		30.0284				47.9911		50.7831		44.3607
		27.9743		64.1768		31.4423		45.4103				55.4517				22.3829		58.0908		42.5928		35.908		35.9926		32.0776				33.2489		51.3685		45.4453
		32.5626		61.4279		30.3661		41.257				42.733				33.5951		65.7687		42.5771		38.5342		34.556		22.7275				35.2291		46.4597		47.1776
		36.5084		64.9102		27.4151		47.3839				53.9984				22.129		56.3245		40.6147		35.713		33.9703		15.7565				46.0185		44.0314		53.4061
		31.0788		55.0773		31.459		42.6222				52.8954				34.9998		47.3377		42.4921		39.8062		32.5012		27.323				24.8505		51.6707		44.5203
		35.5929		59.0638		27.2258		44.4127				47.1641				38.7474		56.3241		42.1752		37.6847		34.7073		28.1276				44.8338		51.0867		44.4766
		38.0913		50.1712		28.5354		44.7096				41.296				24.3233		47.33		41.8845		35.6007		32.4516		28.8201				48.3201		46.0429		50.2781
		27.1136		50.2043		30.4124		42.527				49.6776				26.5839		53.2538		42.4955		38.1475		33.4379		24.399				53.2741		51.1929		46.0838
		29.2433		60.0239		28.8859		47.7289				50.0983				40.3758		50.6703		41.4032		36.5759		33.2112		32.3781				49.0206		51.6374		47.6704
		25.8317		58.2539		31.9379		47.7607				54.4591				23.1089		52.8891		41.7959		37.8347		34.7688		15.9905				31.2507		50.4824		46.6325
		34.8486		55.2891		29.1862		44.7304				47.3556				35.7209		58.0636		40.8317		35.9464		33.7249		25.6898				37.2998		52.6743		44.1727
		28.0455		54.1496		31.0443		42.0923				42.3993				34.6977		47.6009		41.3045		35.7201		32.2159		34.0029				45.2183		50.4064		53.2653
		25.6924		59.9957		28.7608		42.6949				43.6772				38.3867		51.9725		41.572		37.645		35.8032		32.1052				37.1475		47.917		47.2306
		25.1308		60.6439		28.4395		45.3443				46.9247				27.2163		47.4691		41.4429		37.3198		32.5496		28.9083				42.0367		49.6087		51.4087
		25.7261		56.8017		28.1113		44.0652				54.2429				40.1774		55.4102		41.7933		37.1822		35.6444		28.3412				17.1974		49.2795		51.6543
		30.1838		62.9007		30.9285		45.6827				53.4689				24.9457		57.8459		40.9002		35.7544		32.3069		17.0993				51.0537		43.8643		44.9228
		39.6176		63.7681		31.2006		47.5664				53.0236				30.7367		62.1371		41.0436		38.4508		35.9828		19.2575				52.4659		46.5505		51.7783
		39.8899		61.2573		28.2499		41.6257				52.0621				34.9178		49.1904		41.4665		37.7175		33.6111		31.1527				52.8929		52.9077		48.01
		27.5866		54.5805		27.604		45.6038				54.7814				29.2925		60.1026		42.6245		36.083		35.2015		35.511				18.7271		45.4095		53.459
		29.1164		53.5072		30.7493		44.774				50.7787				22.9918		56.7353		41.7166		38.8352		35.4606		25.9454				29.4975		45.7707		51.7893
		39.7016		61.2064		29.8003		47.1968				54.3782				42.7068		61.5256		42.5706		35.4826		33.8434		32.0479				45.8385		46.0574		45.1851
		27.2086		64.4143		31.5529		47.7263				46.4317				39.4787		51.2745		42.2472		38.7347		35.7457		21.1883				19.6545		49.6997		49.9395
		36.9093		57.8354		29.9268		43.0994				44.0324				43.0687		59.0794		41.9001		39.5243		34.6354		18.6851				32.8058		49.6558		48.6411
		33.1208		57.9733		29.2518		47.4822				43.2919				22.4593		64.2267		42.1752		39.4835		32.0862		18.8001				50.8153		52.4901		46.239
		31.0763		60.9761		30.1668		44.9429				45.2578				41.1104		47.3161		40.6393		36.7338		35.0539		23.4111				50.5665		48.4586		52.2362
		31.5255		57.9795		28.516		47.2388				43.1504				31.0686		61.2015		40.94		38.5366		34.663		15.1173				21.4173		51.0341		50.1135
		32.9413		64.1076		28.9628		44.1613				45.6104				42.2594		48.7428		41.1419		37.4753		31.6392		33.6367				49.3216		49.2912		49.515
		26.3956		56.7147		28.2801		43.6564				52.1848				33.5098		61.3532		40.5625		39.1481		33.7234		19.7336				46.1437		45.2929		46.219
		25.7545		64.4535		28.2586		41.6643				42.5337				31.436		60.2088		41.8507		36.4646		35.7235		16.0596				36.9813		45.8545		49.2861

## Sheet: Eastern Kunlun
	Exhumation ages (Ma)		Final Age(Ma)	1σ	Methods	Age Model	Reference
Liu et al., 2007	30	35	32.5048	1.44527	40Ar/39Ar	N.A.	Liu Y, Genser J, Neubauer F, et al. 40Ar/39Ar mineral ages from basement rocks in the Eastern Kunlun Mountains, NW China, and their tectonic implications[J]. Tectonophysics, 2005, 398(3-4): 199-224.
Chen et al., 2011	52.9		52.9	1	AFT	N.A.	CHEN Xuan-hua, Michael W. MCRIVETTE3, LI Li, YIN An, JIANG Rong-bao, WAN Jing-lin, LI Hui-jun. Thermochronological evidence for multi-phase uplifting of the East Kunlun Mountains, northern Tibetan Plateau[J]. Geological Bulletin of China, 2011, 30(11): 1647-1660.
Clark et al., 2010	35		35	1	(U-Th)/He	N.A.	Clark, M., Farley, K., Zheng, D., Wang, Z., and Duvall, A., 2010, Early Cenozoic faulting of the northern Tibetan Plateau margin from apatite (U–Th)/He ages: Earth and Planetary Science Letters, v. 296, no. 1, p. 78-88.
Liu et al., 2017	30	40	34.9786	2.97732	AFT	N.A.	Liu, D., Li, H., Sun, Z., Pan, J., Wang, M., Wang, H., and Marie, L., 2017, AFT dating constrains the Cenozoic uplift of the Qimen Tagh Mountains, Northeast Tibetan Plateau, comparison with LA-ICPMS Zircon U–Pb ages: Gondwana Research, v. 41, p. 438-450.
Mock et al., 1999	30		30	1	40Ar/39Ar	N.A.	Mock, C., Arnaud, N. O., and Cantagrel, J. M., 1999, An early unroofing in northeastern Tibet? Constraints from 40 Ar/39 Ar thermochronology on granitoids from the eastern Kunlun range (Qianghai, NW China): Earth and Planetary Science Letters, v. 171, no. 1, p. 107-122.
Wang et al., 2010	42	59	50.3532	4.84965	AFT	N.A.	Wang, A., Wang, G., Zhang, K., and Garver, J., 2010, An early Cenozoic tectonic event in eastern Kunlun orogen, evidence from detrital fission track geochronology: Earth Science-Journal of China University of Geosciences, v. 35, no. 5, p. 645-652.
Wang et al., 2004	30		30	1	40Ar/39Ar	N.A.	Wang, F., Lob, C.-H., Li, Q., Yeh, M.-W., Wan, J., Zheng, D., and Wang, E., 2004, Onset timing of significant unroofing around Qaidam basin, northern Tibet, China: constraints from 40Ar/39Ar and FT thermochronology on granitoids: Journal of Asian Earth Sciences, v. 24, p. 59-69.
Wang et al., 2016	40		40	1	(U-Th)/He	N.A.	Wang, F., Feng, H., Shi, W., Zhang, W., Wu, L., Yang, L., Wang, Y., Zhang, Z., and Zhu, R., 2016, Relief history and denudation evolution of the northern Tibet margin: Constraints from 40Ar/39Ar and (U–Th)/He dating and implications for far-field effect of rising plateau: Tectonophysics, v. 675, p. 196-208.
Staisch et al., 2020	50	65	57.5181	4.19866	(U-Th)/He, AFT, 40Ar/39Ar	N.A.	Staisch, L. M., Niemi, N. A., Clark, M. K., and Chang, H., 2020, The Cenozoic Evolution of Crustal Shortening and Left-Lateral Shear in the Central East Kunlun Shan: Implications for the Uplift History of the Tibetan Plateau: Tectonics, v. 39, no. 9, p. e2020TC006065.
Wang et al., 2017	35	40	37.5623	1.4731	(U-Th)/He	N.A.	Wang, F., Shi, W., Zhang, W., Wu, L., Yang, L., Wang, Y., and Zhu, R., 2017, Differential growth of the northern Tibetan margin: evidence for oblique stepwise rise of the Tibetan Plateau: Scientific Reports, v. 7, p. 41164.
Wang et al., 2007	45	56	50.7854	3.19951	AFT	N.A.	Wang, G., Xiang, S., Wang, A., Garver, J., Wintsch, R., and Zhang, K., 2007, Thermochronological constraint to the processes of the east Kunlun and adjacent areas in Mesozoic-early Cenozoic: Earth Science-Journal of China University of Geosciences, v. 32, no. 5, p. 605-615.
Wu et al., 2020	55		55	1	AFT	N.A.	Wu, C., Li, J., Zuza, A. V., Liu, C., Liu, W., Chen, X., Jiang, T., and Li, B., 2020, Cenozoic cooling history and fluvial terrace development of the western domain of the Eastern Kunlun Range, northern Tibet: Palaeogeography, Palaeoclimatology, Palaeoecology, v. 560, p. 109971.
Feng et al., 2022	47.8	51	49.4058	0.910695	AFT	N.A.	Feng, Z., Zhang, W., Fang, X., Zan, J., Zhang, T., Song, C., and Yan, M., 2022, Eocene deformation of the NE Tibetan Plateau: Indications from magnetostratigraphic constraints on the oldest sedimentary sequence in the Linxia Basin: Gondwana Research, v. 101, p. 77-93.
Staisch et al., 2020	47		47	1	(U-Th)/He, AFT, 40Ar/39Ar	N.A.	Staisch, L. M., Niemi, N. A., Clark, M. K., and Chang, H., 2020, The Cenozoic Evolution of Crustal Shortening and Left-Lateral Shear in the Central East Kunlun Shan: Implications for the Uplift History of the Tibetan Plateau: Tectonics, v. 39, no. 9, p. e2020TC006065.
Wu et al., 2021	30	35	32.4429	1.44085	AFT	N.A.	Wu C, Li J, Ding L. Low-temperature thermochronology constraints on the evolution of the Eastern Kunlun Range, northern Tibetan Plateau[J]. Geosphere, 2021, 17(4): 1193-1213.
Duvall et al., 2011	50 ± 8		50	8	40Ar/39Ar	N.A.	Duvall, A. R., Clark, M. K., van der Pluijm, B. A., and Li, C., 2011, Direct dating of Eocene reverse faulting in northeastern Tibet using Ar-dating of fault clays and low-temperature thermochronometry: Earth and Planetary Science Letters, v. 304, no. 3–4, p. 520-526.
Yin et al., 2002	49		49	1	Sed.	Old	Yin, A., Rumelhart, P., Butler, R., Cowgill, E., Harrison, T., Foster, D., Ingersoll, R., Qing, Z., Xian-Qiang, Z., and Xiao-Feng, W., 2002, Tectonic history of the Altyn Tagh fault system in northern Tibet inferred from Cenozoic sedimentation: Geological Society of America Bulletin, v. 114, no. 10, p. 1257-1295.
Bush et al., 2016	47.8	59.2	53.4029	3.26076	Sed.	Old	Bush, M. A., Saylor, J. E., Horton, B. K., and Nie, J., 2016, Growth of the Qaidam Basin during Cenozoic exhumation in the northern Tibetan Plateau: Inferences from depositional patterns and multiproxy detrital provenance signatures: Lithosphere, v. 8, no. 1, p. 58-82.
Liu et al., 2007		Chen et al., 2011		Clark et al., 2010		Liu et al., 2017		Mock et al., 1999		Wang et al., 2010		Wang et al., 2004		Wang et al., 2016		Yin et al., 2002		Bush et al., 2016		Staisch et al., 2020		Wang et al., 2017		Wang et al., 2007		Wu et al., 2020		Feng et al., 2022		Staisch et al., 2020		Wu et al., 2021		Duvall et al., 2011
32.5048	1.44527	52.9	1	35	1	34.9786	2.97732	30	1	50.3532	4.84965	30	1	40	1	49	1	53.4029	3.26076	57.5181	4.19866	37.5623	1.4731	50.7854	3.19951	55	1	49.4058	0.910695	47	1	32.4429	1.44085	50	8
33.0898						36.7435				45.5724								54.5396		51.6248		38.9381		50.139				48.8068				32.8231
34.8396						39.8442				56.5531								58.1722		54.8272		38.7875		53.2605				50.075				32.0558
33.6626						36.7112				55.9331								49.2626		64.7715		39.5833		47.3729				50.8438				33.5434
30.0446						32.9606				58.0533								56.4597		63.1881		36.4106		55.4369				48.165				33.0839
33.393						33.024				43.98								48.8606		61.5823		39.1598		52.6019				50.4713				32.1777
30.9942						38.2009				47.1227								50.5585		64.7032		39.6818		47.1666				49.9279				34.9527
34.258						38.3916				58.8107								53.7651		62.9685		39.5457		46.2038				50.6037				32.2266
34.8395						33.8473				43.549								49.0784		64.0803		39.858		47.0689				49.8738				31.9221
32.8256						33.9385				52.8107								52.453		61.5721		39.9165		46.0052				49.7902				30.2394
34.6621						37.3997				56.1669								58.2832		64.461		39.1938		55.8068				48.7522				31.3827
33.7002						34.2354				43.2545								48.0931		53.8613		35.2202		52.8215				48.3157				30.9122
32.2718						32.7239				51.0148								54.3093		50.0572		38.8431		54.9589				50.2067				33.5707
34.3907						31.7865				47.6938								51.175		52.0314		35.184		50.7998				50.4177				31.4421
33.7595						37.723				54.9384								51.9768		64.6315		36.1638		52.1801				50.5404				33.8735
34.3896						38.5645				43.0283								53.9135		61.6623		35.8205		47.5955				50.1058				30.0451
31.0355						35.543				43.6783								49.6366		53.3804		37.0403		55.635				48.9511				33.2721
32.7524						37.2528				55.1881								48.3439		58.0404		38.6618		45.0377				50.1304				34.9631
32.3828						30.4302				55.5956								56.7705		63.6826		37.64		54.3848				48.2359				31.7955
31.8576						37.3328				44.3256								56.0448		60.6717		39.9466		52.3726				49.4705				32.6352
30.744						39.0628				58.1018								53.6094		57.3467		37.1906		45.1424				48.803				34.6261
30.9306						34.5505				48.8639								50.0555		58.9052		38.346		47.137				49.165				30.7387
34.5972						38.7156				52.863								52.8338		59.6593		38.5259		55.0672				48.367				31.6524
32.319						30.4495				55.1576								53.0746		55.816		35.1724		54.1721				47.9247				30.7409
31.3004						37.87				43.0528								55.5078		56.5002		38.1854		47.4292				49.8451				30.6972
34.9189						36.5552				54.3434								50.9959		54.8457		37.4163		54.4842				48.6308				32.7543
34.0264						31.7863				46.7872								58.6499		52.4318		39.2067		49.7455				48.1596				30.85
33.6475						30.5753				54.6354								48.7391		59.7136		35.516		53.5339				49.0611				30.5583
31.9958						36.3165				45.7995								49.2961		58.2513		36.4666		45.812				49.5903				32.6399
32.354						30.7798				55.944								53.347		52.4474		35.0419		52.1155				50.0945				33.4534
30.4271						34.1371				51.6111								48.4765		52.6516		37.4915		49.7138				48.7952				32.4529
33.1796						37.4723				42.2056								55.1223		60.5899		38.6008		52.52				50.4278				32.7703
34.1219						38.81				55.2162								49.2511		62.3189		38.3862		53.2569				49.294				33.5955
32.5662						33.9491				50.0343								57.2039		59.7369		35.3657		52.8267				47.9777				33.9817
30.8012						38.8475				52.28								56.4804		53.606		38.5692		48.3249				48.9376				30.1872
33.31						35.9221				42.9689								54.2327		63.832		35.8281		54.7953				48.8303				34.1222
33.9875						30.8737				55.472								55.9369		64.4143		38.6128		55.4909				48.5891				34.7633
31.6372						31.6929				55.3103								53.3624		59.105		35.2332		54.2629				48.9225				32.4484
34.2991						37.9455				45.8139								56.3983		58.7613		39.004		55.2052				48.9255				33.0767
34.8107						35.1023				53.9853								50.126		57.1404		37.5139		51.4887				49.1479				33.784
32.0747						39.2654				43.7071								57.6428		55.4785		35.4832		52.8841				47.9336				34.7571
31.2243						32.525				48.7135								58.4959		55.8828		35.3501		53.5491				50.1483				31.091
30.8278						39.1112				55.1937								55.8836		53.5985		35.3964		45.233				49.5489				34.7485
31.4541						35.5165				52.0141								53.8546		58.2414		39.3878		47.5039				48.1323				30.2443
34.6449						37.104				50.9624								57.6957		51.186		38.3908		55.3243				50.7353				32.3512
33.1764						33.7877				55.7422								58.2717		54.696		37.9204		55.9719				49.1481				33.3303
31.0473						34.2274				48.3623								56.3006		53.928		39.3996		55.8615				49.0144				31.6162
31.3433						30.9131				57.6225								59.1436		58.7025		39.6356		54.3902				48.978				33.4189
31.1846						34.1959				44.4996								48.721		59.6128		37.7067		47.4723				47.862				33.9218
34.501						38.0619				45.6677								56.2118		62.2636		36.04		48.7251				48.0608				31.1697
34.7799						37.4071				47.9903								52.5275		54.7687		37.1605		51.8756				47.9199				30.9867
30.879						30.7554				46.9443								59.19		59.7567		35.2626		48.9884				49.2758				34.3705
34.0209						37.8045				49.5531								57.3843		50.4592		39.964		52.3767				49.8545				30.6051
30.517						34.5393				44.6141								49.2364		59.3326		35.1679		51.0796				49.5773				34.9096
30.0288						37.5037				52.816								48.1484		50.3071		39.4655		50.0277				50.6425				31.6386
34.4607						36.2388				51.5528								51.1481		54.9442		35.7557		47.0569				48.5801				33.1438
30.4474						36.5989				49.6276								50.0247		54.9613		37.551		50.9941				50.1068				34.0531
33.6559						38.9347				58.9375								55.2409		57.5438		37.029		52.0353				49.2695				32.1004
31.8417						34.3539				44.664								50.0127		63.7194		36.8462		52.6829				49.3132				30.1283
32.2713						39.2589				44.0515								55.0254		51.7419		37.6421		52.8684				50.0702				34.5649
33.6928						35.8704				49.2593								51.4523		64.387		35.5384		47.0386				50.071				30.0279
31.8776						31.727				48.5066								57.5021		63.4918		37.9609		53.9579				47.856				32.8463
31.3378						38.2358				51.5388								50.7631		52.2429		35.3681		48.0447				49.526				32.7492
32.8051						39.8682				53.4984								50.1434		59.2658		39.6494		50.6869				48.2484				33.743
31.0152						36.2302				51.2862								53.4149		52.1879		39.5126		51.2691				47.9742				30.9235
30.8232						39.5241				53.238								56.6517		64.2331		37.2549		46.5691				48.8997				30.1559
34.95						36.0103				50.9406								50.5325		53.8838		39.3601		45.382				49.2157				33.7116
32.3736						34.3192				58.5968								51.0278		59.4714		36.9168		52.7536				50.2957				30.6131
32.0455						34.3839				52.0699								55.6485		57.1785		36.7623		54.3316				50.3313				34.5711
30.8567						34.5118				42.0699								48.502		58.9441		38.2911		47.9733				49.4956				33.9587
30.4104						33.5756				49.0354								55.8945		52.0838		38.6862		53.1461				50.078				30.937
30.3693						38.9659				49.4188								50.0719		50.3075		37.2637		55.5803				50.9914				32.5293
30.9203						37.1449				52.828								56.5719		55.527		37.11		53.7584				50.0964				34.2615
30.3931						31.0396				46.7336								50.1158		54.7312		37.4188		51.7927				48.0856				33.5683
33.022						39.0224				49.5995								52.2022		62.6903		35.7083		51.4096				50.4189				30.1576
33.0458						35.5065				53.7937								55.9798		57.1467		35.6301		49.2757				50.5277				33.9413
34.794						35.3318				45.212								53.6737		56.7326		35.9024		51.9626				48.2279				32.089
34.3752						34.5824				54.9886								57.3964		61.5833		35.4963		49.0984				49.0483				31.8567
34.5158						30.2642				43.9867								47.8839		59.1812		37.2311		51.6872				49.6601				32.9586
34.0399						39.1043				44.9337								57.4079		51.8037		36.0285		54.2709				50.5756				30.5577
33.9258						36.2721				44.1517								48.5867		58.7053		35.6752		49.4027				47.8131				32.0261
30.9276						31.3109				50.2435								50.5267		58.8809		39.5728		45.9918				48.5327				30.4613
31.7405						34.9489				44.4147								54.1409		63.5902		39.3256		52.7936				48.9937				31.9393
31.5541						34.598				55.3034								52.0778		59.9089		35.7142		54.0014				49.4492				32.467
30.5521						31.1204				58.9944								55.2412		64.2848		38.9879		45.4394				48.9153				34.6495
33.6154						32.5898				46.6852								57.8668		53.5389		35.8981		55.4038				47.8192				34.5203
32.976						38.447				56.223								48.017		63.1307		35.9998		54.3836				48.0936				31.9688
32.3997						35.4699				51.8915								50.5103		55.9391		38.3884		45.1333				49.0541				30.3486
33.4107						35.96				42.3495								53.2175		63.3535		35.5711		51.7903				49.4196				30.8537
32.7041						39.6122				45.3217								53.9007		55.6918		35.1595		48.2379				48.1003				32.6355
33.3335						30.7027				44.172								57.7827		52.3689		39.2129		50.1044				50.8357				34.2631
34.2742						32.6134				58.3062								48.0796		55.0236		38.5143		50.9163				50.9316				31.7602
34.8841						38.2454				57.7905								58.5796		58.8724		35.1936		48.4012				50.6059				32.308
32.7793						32.1075				43.1497								52.0286		56.4912		37.8567		46.401				50.8174				31.6216
30.5722						31.832				43.3675								50.3309		57.4391		37.8187		45.8738				49.8499				33.0947
31.6428						38.5432				58.0371								49.384		58.9481		39.866		52.7956				49.0546				33.1717
32.8628						31.0538				53.245								58.4997		53.4756		38.3799		54.6355				47.9516				34.5988
34.1493						37.6147				47.3708								52.8255		59.395		38.666		55.7584				50.7605				34.5287
30.1267						32.2678				53.0047								58.6866		61.6482		38.8792		51.9359				48.8775				30.3689
34.8619						31.1154				54.8387								56.1964		51.9336		36.6164		49.2415				50.1976				34.1581
33.2572						38.3269				57.9838								49.1296		56.3692		37.6079		50.2891				47.8737				31.6026
30.3245						37.6068				43.9871								49.136		56.0669		36.9397		48.0111				49.7661				30.8181
34.0828						31.2951				53.0358								57.4494		54.1013		39.8832		55.2034				48.3463				31.2665
31.9247						34.1838				57.2755								49.5193		62.995		37.1717		52.3134				49.7097				34.3118
30.7963						35.8046				46.8197								58.0798		60.9419		36.2677		52.8571				48.1694				30.6444
33.9388						36.276				51.8987								57.1718		54.8023		38.5727		48.6005				48.8511				32.4503
30.4253						34.5377				48.1868								48.3212		55.307		37.62		50.362				49.6984				31.186
34.2224						38.3514				44.2793								57.0233		51.8231		35.085		53.9536				49.6213				31.7309
30.7632						37.0614				43.5574								57.5673		56.53		36.9015		48.5818				50.9423				32.4912
32.8639						37.2946				57.3645								47.8875		54.6832		36.1459		48.6401				50.6959				32.6315
34.6098						36.0254				53.3146								55.7671		53.3274		37.4999		46.2754				49.4701				34.8476
33.7609						34.7126				48.597								54.9876		52.3751		36.5924		52.6767				48.9222				33.3825
32.2566						39.1137				54.6717								54.0006		64.0926		39.9035		48.1694				50.4562				33.7354
33.2436						39.9421				46.5249								50.6773		56.146		36.2504		50.1385				50.6007				30.4989
30.3277						33.7729				47.6248								55.4682		51.7592		35.2922		45.8274				50.9959				34.739
30.3918						34.9745				57.8706								57.0534		59.9153		39.014		55.2675				48.213				33.2442
33.0763						32.8059				55.6341								59.1991		60.4949		38.9313		54.0033				50.6292				32.3665
31.1165						38.8715				46.0128								51.7491		64.8008		35.4825		54.924				48.7208				32.1716
32.9399						36.7979				51.1913								49.821		50.2202		38.566		47.2083				50.8506				30.3539
33.5736						38.111				49.8873								56.4643		56.7973		38.1225		54.7983				49.6639				34.2676
34.9868						34.1387				45.3305								52.7268		53.3609		38.867		48.4367				48.2353				33.6366
30.7832						35.8787				53.9565								51.2955		62.7707		39.1547		50.2936				48.4784				32.7798
31.1668						31.8572				46.8517								51.4767		56.6085		35.2457		45.4899				48.7419				33.9356
32.0378						32.1559				42.5615								57.4565		59.0211		37.112		54.7832				49.2191				34.1059
31.7845						32.5028				54.7704								48.2781		59.314		36.6644		53.2809				49.0535				32.3979
34.6877						30.3119				56.5992								48.9414		59.4754		35.7322		53.6979				49.0133				32.6381
30.7156						35.787				54.6386								52.9154		63.2719		37.3751		51.4149				49.2103				33.5329
31.8028						32.945				52.1274								57.0311		53.7999		38.1597		54.6903				50.0563				33.7686
34.9409						34.1652				58.719								57.8133		55.8149		39.4215		53.6469				49.6928				34.0722
33.8329						39.0741				43.7425								52.4995		54.3336		39.6843		52.3066				48.3659				32.0337
33.6244						30.6206				49.3083								55.9574		54.9593		38.9036		45.0288				49.0692				33.8949
33.471						32.9966				57.9719								52.7921		61.881		37.9888		47.4772				49.4745				31.0255
34.5446						32.533				50.6115								56.2352		57.7063		37.1567		53.6742				50.2374				33.1037
34.5549						33.4597				50.4759								50.3776		55.4047		35.0628		53.1455				48.7605				32.4577
32.9436						39.858				50.0738								50.1187		57.9135		37.5646		47.9114				48.5938				30.0666
33.0046						34.5958				42.8604								54.225		56.1197		37.7947		53.5155				49.352				31.8662
31.1927						39.6301				53.3428								49.9356		52.7352		38.8716		47.3312				50.2365				30.7844
32.9934						36.8453				55.5091								57.4347		52.9742		39.0839		55.654				49.3828				34.4889
33.8383						32.0106				51.0027								54.1795		59.2986		39.7415		55.1545				50.7387				34.1211
31.2103						39.481				42.206								58.7862		56.6953		38.0278		46.5748				50.8251				32.7427
33.8937						36.5832				45.1299								55.3869		56.4541		36.6313		45.7602				49.3681				32.2202
32.1773						36.2103				54.236								56.5585		60.8622		35.2842		53.2013				47.8457				33.0408
32.821						34.1105				58.1108								57.0558		58.3071		35.6601		51.4707				49.5024				33.6531
30.5894						31.6665				46.3361								57.0118		63.8934		36.1389		53.6672				48.1153				30.8525
32.7002						30.7277				43.2265								50.3153		64.8504		39.3283		55.547				49.7616				34.4223
30.5144						35.1702				50.6905								48.3692		51.5056		38.5127		53.5633				50.3873				33.4067
33.4347						38.4449				46.6144								58.1991		60.016		39.6086		45.8819				48.2401				32.6728
30.5254						36.2532				55.9527								53.8177		58.6515		39.6658		51.4388				50.2111				31.0011
30.6684						34.7082				47.9858								50.8036		60.7204		38.759		49.9124				50.1887				34.4849
34.057						32.7941				50.3514								58.3191		55.5412		36.9845		46.2449				50.4007				30.7133
32.7691						30.9597				57.0156								48.5085		56.4151		38.0519		54.3019				49.4935				30.2039
32.0396						37.1934				46.3195								52.2558		59.544		39.8129		54.3193				48.4652				33.8492
30.3714						38.2941				49.6592								53.8733		50.8873		36.4018		47.959				50.9691				31.135
31.3791						39.5101				49.1228								53.5363		53.5253		35.6174		49.378				48.1725				34.3278
33.764						38.5531				49.7026								52.733		59.2222		37.7202		51.6662				47.8253				30.9742
33.387						35.3427				49.7971								53.8942		60.717		38.0767		49.5394				50.4626				33.4134
30.6344						37.47				56.3178								59.0883		64.6093		35.0548		54.9822				48.0481				30.7351
32.8772						38.5599				43.2994								51.8761		55.5319		39.8324		53.9385				50.3926				30.5946
33.661						34.4672				58.6265								57.8008		55.4135		38.3648		49.2291				49.8285				34.9077
34.1875						36.3953				52.8101								50.792		50.4862		37.4962		55.0486				50.355				32.0015
31.3154						39.9262				51.2323								48.384		51.7714		38.5932		54.2977				50.9921				31.1167
33.3347						32.0441				42.8973								57.1387		51.4484		35.8024		55.1757				48.3878				34.4429
32.2816						33.373				58.1653								52.8948		61.7333		37.4163		52.0366				49.3599				31.3358
34.9691						35.8186				53.2139								52.8785		54.5025		35.8509		51.182				49.8101				32.8352
30.9888						39.4421				48.6496								49.8122		57.9665		36.5324		46.8461				50.822				32.78
32.1889						39.707				57.2318								52.4568		50.8933		38.9014		50.2686				48.0235				34.4889
30.573						33.1023				51.1074								57.191		54.779		39.0618		52.3636				50.8295				30.2632
30.8817						30.5063				51.9295								48.025		64.8383		38.5046		45.3175				49.1483				30.5421
33.0492						32.6184				54.9082								58.9555		50.5349		35.4649		52.3171				49.8906				30.8746
33.1527						37.4978				53.1054								54.904		60.4217		35.0984		48.9961				49.7221				30.1432
31.7982						34.9514				53.8988								48.9422		63.7896		37.7837		52.2959				50.7233				32.849
34.8065						34.3624				52.8224								48.271		52.6813		37.7186		46.8519				50.1599				34.8273
31.9278						30.4844				52.6018								57.8827		50.0036		35.0887		47.0707				49.8894				32.474
34.8313						38.3011				50.6097								52.7876		56.1197		38.3042		46.1028				49.1432				32.9543
32.9952						30.9314				58.0147								51.162		59.5647		38.839		51.0895				49.4364				30.2697
31.9642						38.3069				58.9126								52.98		51.7054		39.9387		53.2624				48.3827				34.5251
33.8558						36.4603				56.4173								53.6368		59.9709		39.5347		50.5895				50.042				30.3009
34.6388						36.9001				48.4557								50.5812		61.8956		37.8607		52.7104				48.239				33.9753
30.112						32.4338				56.1256								56.5351		62.8091		39.2139		54.6356				49.476				33.3066
31.1426						35.8736				46.3569								53.9559		61.6353		35.7922		55.5689				49.9278				33.2488
31.8765						34.9296				42.9829								49.5572		56.2629		38.246		48.1247				50.2374				31.4034
32.6777						38.0772				53.7081								54.6983		52.8165		37.5479		52.2306				49.6642				34.3402
33.3435						32.2408				53.1466								50.2434		51.075		38.2052		45.9961				49.4249				33.5605
32.3342						34.7198				51.9949								51.3023		62.8785		37.4172		49.8672				49.7354				34.5027
31.3747						36.7009				58.4833								57.3943		64.7866		37.1649		49.6002				50.9984				32.5387
30.1557						37.9816				57.0371								52.7339		62.2821		37.7905		46.8919				49.7143				33.8496
33.1397						31.8126				56.0696								49.3791		53.2719		35.4814		54.5912				50.592				33.4119
32.1194						37.5267				48.7446								56.6593		51.9607		38.7825		51.0564				50.6829				31.739
30.0281						32.1526				57.1754								51.4829		52.3781		35.1738		50.374				50.9756				30.9284
34.2789						36.215				56.3201								50.3707		59.4971		35.147		50.8087				48.484				34.5227
31.1945						34.0405				52.7056								57.425		63.7214		37.0565		53.28				49.2888				32.3385
32.6928						34.2694				42.3489								53.1298		57.3426		35.7138		47.571				50.8903				33.7267
34.7289						30.414				50.5164								57.3037		52.9322		36.1844		47.8866				48.3398				31.4544
32.6789						33.5404				45.8292								50.8941		51.4045		37.4641		55.7374				50.417				34.2313
34.3368						33.1593				58.4006								58.2391		59.0133		37.1802		48.6094				50.2241				32.616
30.9771						30.9777				47.322								53.3229		51.7569		36.8731		49.7694				48.9271				34.2251
32.8409						30.6525				47.8086								52.8369		54.1095		38.0724		50.3805				50.5192				34.3108
33.4567						37.795				46.9672								57.8262		63.6833		39.2949		52.0814				50.2898				32.0337
31.3781						32.6257				51.4869								53.9433		64.277		36.4069		47.5141				50.6343				33.6
30.1943						30.7314				58.4545								55.8058		53.9561		35.2004		54.3553				48.7074				32.9197
34.8768						30.1179				45.6761								47.8171		58.6754		35.3681		46.913				50.9971				32.3984
34.4623						38.934				51.1569								55.9124		52.779		37.8501		49.2886				48.4624				34.6347
34.7987						39.4836				48.8237								50.26		51.7347		38.93		46.61				49.1323				34.5179
31.6664						30.9076				44.5835								53.0514		52.3394		39.2008		55.431				49.8634				32.9817
30.5225						30.0225				53.1305								51.2654		61.3406		35.1782		48.085				50.1364				33.3253
30.2745						38.4274				53.2409								57.2238		58.9177		36.0265		55.8501				48.0053				34.0194
33.4522						36.0113				55.3945								55.5717		54.7677		36.8936		46.032				49.2518				30.9443
30.3767						31.0051				47.5953								54.864		61.0553		37.0999		47.3596				48.0469				31.1814
30.9085						35.9615				46.5825								50.9186		57.2671		37.5524		52.2505				48.3702				34.3364
31.5921						31.4106				44.3692								56.7895		58.9232		37.0004		54.0175				48.7493				30.9748
30.7771						35.4805				47.1724								50.8293		61.0203		37.1186		47.1326				50.0234				31.3363
34.5951						33.7401				55.5172								51.1822		50.0467		38.7143		45.4509				50.2835				31.6768
34.9242						31.1118				45.1445								51.3124		55.0344		39.4566		49.7407				50.9045				31.9206
31.0592						35.1646				48.3483								50.2934		61.0886		38.1247		53.1806				47.8672				30.4796
30.8636						34.0726				43.4649								56.8046		63.6084		36.9616		50.469				49.5601				33.6592
31.9454						33.237				47.1423								55.7293		60.7023		36.3014		45.2447				50.154				33.0223
34.4422						30.2076				44.3145								50.0625		64.2863		38.9939		49.2683				48.0725				33.4518
33.7537						35.1525				47.8201								54.0413		58.4454		36.8669		55.4711				48.0777				33.2029
31.5273						30.8752				52.3871								48.7877		60.5453		36.7728		48.6151				48.2999				33.822
33.7884						33.9543				45.1156								49.4398		59.6928		37.7434		51.3608				49.5034				30.1465
33.3127						37.1655				42.5503								56.7886		57.2423		37.0312		54.3574				48.2565				34.636
32.2458						33.9881				42.1201								57.1535		55.8824		39.7285		46.5807				50.2957				32.9724
30.6583						35.8507				44.4096								48.4705		61.0159		35.6234		46.5467				50.7829				31.0287
32.4166						38.699				48.3693								51.4614		57.7108		39.2993		55.5772				48.9183				30.9849
34.9517						33.6983				50.3252								58.7804		52.2861		37.2303		51.1239				48.3176				33.5017
31.7476						32.331				47.8603								49.9169		64.9302		36.3591		53.0897				48.4627				31.8027
34.7842						38.6975				50.7741								48.6834		57.2516		35.3801		46.8073				48.1129				33.0151
32.1739						31.7363				57.5889								49.2857		56.1183		35.3632		51.5554				49.0035				33.2943
30.6756						33.5113				50.683								58.5619		64.2744		36.6012		47.1347				48.9059				31.5775
32.1763						32.2419				42.8897								52.9899		56.7232		35.2901		45.8932				49.5877				30.8371
30.4619						35.6981				52.326								57.0891		55.7219		37.0034		53.4955				49.6142				30.484
31.4174						30.4831				44.5937								55.0528		52.4864		37.9745		46.6133				48.4287				30.8845
30.442						32.5899				46.3782								57.0143		60.9018		37.327		45.2449				50.1529				33.2793
32.6868						30.7838				57.5789								55.0782		54.7646		37.5691		55.6844				48.9277				33.2149
34.4825						34.1423				54.1771								56.153		58.5328		39.9688		54.1478				50.7543				33.0111
34.6556						32.7735				43.9334								52.3631		53.208		39.9871		51.4872				49.2827				33.7721
31.3776						30.521				45.2548								48.9514		51.5005		37.4367		54.0944				49.075				30.0036
34.4143						38.7126				54.9511								48.2357		58.8844		38.7171		51.3882				48.5569				31.4848
33.1483						33.5219				56.8564								49.2768		64.8262		37.8969		45.071				48.118				33.4825
34.8304						36.8046				49.7764								49.6427		62.6243		38.493		52.8285				48.4332				32.4028
33.6211						37.9676				58.1103								58.9078		52.5869		39.9159		45.662				50.6185				30.4501
31.6779						33.2036				45.6997								53.3174		58.6917		35.0652		47.678				50.0615				30.8797
34.2232						39.2428				58.9404								53.2611		56.9053		37.7071		53.5547				50.3992				33.6195
31.3457						30.404				50.7427								52.5398		54.1663		35.0926		52.0215				48.7132				33.5865
31.6183						39.3006				58.8476								54.0401		60.2226		38.7409		54.7934				47.8409				33.5809
33.189						35.7341				46.2054								54.3403		64.1453		36.9397		53.0318				48.6977				34.8892
31.5351						38.3833				44.5038								50.7803		58.4798		38.3923		49.2558				48.8933				30.4253
30.1047						39.9139				52.4656								58.6906		53.1726		35.8348		55.5389				50.8249				32.2926
34.6195						38.308				46.9974								49.8583		50.0923		39.6054		45.6797				48.14				30.8342
33.5695						38.2273				45.7356								58.6003		50.101		36.6223		55.5713				48.2638				33.7551
32.8696						32.6173				51.8035								58.4709		55.4489		39.1772		46.0493				50.0499				34.4241
30.8733						37.3795				47.0336								49.2425		56.3813		39.9412		52.8882				50.7281				30.5248
33.1294						38.6573				56.0856								58.8479		62.8476		36.9281		48.4914				50.7251				34.1442
31.4138						35.6241				49.8276								53.802		54.2826		39.2289		45.8766				47.857				33.9984
33.5517						36.24				54.5263								56.138		62.1144		36.9766		53.6718				50.9322				30.8516
33.431						31.876				46.3142								59.0747		53.9924		35.5128		45.7059				48.943				34.8488
33.9274						36.43				48.0628								52.1253		50.5972		37.7987		55.1872				49.7665				30.0398
33.1437						30.4043				42.176								50.0826		50.4721		38.5726		53.8359				48.4317				34.6361
31.2793						38.1				54.6755								50.0431		62.919		37.756		55.5617				50.9618				32.7102
34.0855						32.1877				51.2479								52.7721		56.815		35.0923		51.5054				50.4558				32.1105
30.5482						33.377				57.4454								56.8125		61.1669		35.649		45.5104				49.3949				31.4216
31.6246						38.8581				49.4493								56.9098		57.3792		39.1629		55.2376				50.7354				30.9948
31.3025						38.4547				54.4042								48.8621		59.5217		35.9758		52.9149				49.7871				30.8808
33.6991						37.7155				52.9435								52.6184		59.4108		38.3128		55.1799				50.7597				31.1858
33.4959						34.2688				56.2063								50.4862		54.8207		39.5321		45.6753				48.4709				31.4782
32.108						37.2985				54.9844								49.7742		60.0521		39.4724		49.518				50.3942				33.0526
33.4314						36.7867				53.781								52.4861		57.0104		37.7526		49.2741				49.5348				33.3998
33.4048						37.0601				56.7689								55.8226		53.3361		37.3658		53.0628				49.2972				34.2655
30.2403						36.9976				55.3236								58.1587		57.519		35.3149		48.9771				50.5616				32.9326
30.8673						33.0225				44.2981								58.6218		61.6443		35.4674		54.3029				48.9049				33.9022
34.1866						33.6917				57.9386								55.4527		63.6908		36.1578		45.5856				47.9289				31.8491
33.9766						35.5403				46.381								52.5879		53.6512		36.576		47.9404				50.0338				30.0961
31.9004						33.4367				56.6342								58.4342		51.6383		35.6902		54.2647				48.3358				32.7682
31.2471						33.0904				54.2374								53.2911		53.5837		39.3202		53.8287				50.2269				32.4575
34.8046						35.9677				44.4171								53.2289		63.7974		36.1089		53.3041				50.0954				30.0611
34.9306						38.4599				44.0244								48.9856		52.2129		35.1675		46.473				49.1733				30.3303
30.6048						37.3458				44.9057								51.4219		64.5453		37.785		48.5977				48.4705				30.6289
33.3244						37.0321				42.0484								51.2114		60.5029		36.04		51.9182				50.771				32.7053
33.1058						38.7004				44.3589								52.155		53.0046		39.9541		51.1775				48.2115				31.3321
33.0228						33.7642				56.8089								48.4549		51.5802		37.8916		48.5815				48.6038				31.4713
33.8297						34.3115				46.9551								58.5775		59.9234		35.5098		47.504				48.487				34.6617
32.2807						35.1821				55.0655								57.0372		64.7689		38.1792		55.0758				48.6148				33.3372
33.4313						34.2371				51.9923								49.276		59.2057		35.462		51.4628				48.5438				31.7299
33.4816						37.5896				46.966								51.4476		58.2319		38.8763		53.6837				50.922				31.385
33.6292						31.1871				43.4715								49.7595		52.6639		38.453		48.1891				50.3863				31.4913
34.4809						32.9509				47.3877								56.1365		64.7833		37.1773		47.1459				48.87				31.3483
34.1772						39.0094				46.6598								58.89		59.8666		38.6534		47.2477				48.7796				32.5227
33.9694						37.7288				49.3108								54.8433		56.5326		38.54		50.1635				48.1984				30.3145
32.3333						30.6698				48.0233								55.9545		61.2002		36.0602		50.5983				49.1895				34.328
31.0611						33.7315				53.7994								54.4909		61.4558		37.3256		53.7014				50.2309				34.0855
31.7966						36.5197				55.189								57.1814		64.8326		39.5041		55.961				49.2592				32.154
32.7337						31.9608				53.1549								51.2684		52.5939		38.3736		51.2369				49.4001				33.8348
32.0497						30.4759				50.9318								50.5291		61.576		37.0304		49.4118				48.4195				34.0861
32.2133						37.9484				53.7769								56.2678		55.8327		39.891		51.9706				49.4945				31.0322
32.4869						35.5837				57.6374								50.2045		56.696		39.6158		50.8072				50.1321				30.145
34.4614						39.2206				46.8816								55.5398		61.7054		37.7289		55.0033				50.2285				31.9925
31.0758						35.9965				55.8462								51.7097		56.2754		38.4844		53.9867				50.3527				32.6445
31.4734						34.2405				56.2133								53.7938		57.6088		39.9245		47.5971				49.1419				34.8767
32.6892						32.8346				52.2498								51.1399		57.2366		38.387		51.2839				50.822				31.5162
34.5016						35.6622				49.2644								48.5988		50.9728		36.8058		52.368				49.898				34.0686
31.0138						34.7855				51.1609								56.2991		59.3019		37.6665		55.859				48.8194				34.3389
31.6326						32.5514				48.6259								48.4434		62.7252		39.9555		53.8496				49.1925				31.7293
30.7631						36.0624				52.4415								52.3521		53.8261		38.6909		53.0903				50.1072				31.6041
33.7808						36.0384				52.8312								55.3753		59.2868		37.6438		48.8515				49.6251				31.8041
30.583						31.8103				44.2938								48.8118		64.6378		38.5686		50.1373				48.53				34.9792
32.6565						38.4979				46.41								52.4752		56.7844		35.4092		47.4408				50.1784				33.4574
32.9218						36.0257				57.9903								51.3936		50.458		36.1396		54.6445				50.9804				34.3222
33.8838						33.1432				43.9458								54.7772		57.9512		37.6968		47.7605				48.5951				32.0672
32.8031						39.4797				56.1496								48.9494		55.1451		39.5098		52.6496				50.0543				32.3476
34.0638						33.5901				43.9785								55.215		63.69		36.4357		54.3006				49.5539				32.7457
31.1052						34.3065				46.5663								53.3571		51.0142		36.0113		45.9206				48.8348				32.2312
33.7455						35.1152				43.8708								57.1251		50.3361		35.6888		53.1781				49.0585				31.1986
32.3766						30.8013				45.6228								56.1682		58.6777		37.9074		45.8705				47.9355				30.2661
31.0417						30.5977				56.3691								50.2568		63.3203		35.4141		53.9242				48.2877				34.8645
32.08						39.4332				47.7656								58.4814		59.8142		38.9694		55.8025				49.2524				31.5563
33.7145						30.54				55.2389								54.8127		55.4448		36.7723		55.3139				49.6977				32.1411
30.7925						31.7841				47.0146								56.9826		62.6094		37.4034		45.1613				48.2082				33.1811
33.8638						36.4439				44.484								57.4659		54.6385		39.443		55.4574				48.4301				32.9791
32.0236						37.2703				56.4087								50.4693		53.7602		36.9828		45.7332				49.3504				34.211
33.158						31.8286				52.3154								49.6806		56.2571		39.5721		52.7638				49.9472				32.4915
30.8755						36.1481				53.4898								51.9678		58.7738		36.3654		48.262				47.8394				34.2817
32.0821						37.2935				49.9338								50.3122		54.9645		37.1658		52.1003				50.8003				32.4107
31.1082						30.3505				55.4647								54.4502		52.7158		39.5414		45.7939				50.0691				34.1601
31.5561						35.7834				55.2027								58.4429		60.002		35.2488		53.4326				48.7386				34.3418
34.1291						38.5025				42.1542								54.7665		54.7325		35.9277		45.8861				50.7573				32.0783
33.7964						31.4447				44.3413								55.265		59.676		37.2327		52.3835				49.9781				34.6098
33.4751						35.2919				56.8614								51.0082		61.4425		35.7964		51.3076				48.4211				33.1674
33.3785						33.7388				58.9766								53.8234		58.5148		38.0321		54.4528				49.2118				32.5972
30.4399						37.0611				49.7926								52.4818		54.7165		38.1556		46.2825				49.4219				33.7009
33.3748						35.2331				48.5452								57.2858		57.2431		36.5052		54.0406				50.2115				32.6026
30.0087						32.1579				51.1673								53.2194		55.2968		38.3397		52.8862				50.3902				30.2282
30.6679						34.3836				46.6219								52.1168		62.7425		39.5773		55.2415				48.7889				34.9804
30.7887						30.7179				58.262								56.1654		55.7044		39.8019		45.8922				48.088				34.6566
30.7494						31.6931				55.7058								53.2595		57.787		37.6245		53.1456				50.3071				30.3775
32.9293						30.2457				49.0776								50.2099		62.8223		37.9203		47.962				49.7421				30.008
33.8571						30.3482				48.6246								52.9162		64.5115		39.1511		47.935				49.7651				30.5953
32.5831						35.4051				54.1377								49.0043		56.7798		36.5582		53.4203				50.9325				32.2285
34.1424						33.5792				54.6783								54.78		57.813		35.0087		49.0005				50.1544				34.2352
30.9451						30.0901				50.7969								49.9353		62.3752		38.626		47.1218				50.3477				30.1541
34.7518						31.2551				50.6254								57.7111		53.3679		39.3124		55.3341				50.4965				32.1363
33.8183						30.2498				50.6119								50.8248		54.1709		35.8149		48.818				50.4212				34.8667
30.6476						36.7644				55.721								48.6779		59.2005		39.2599		51.8378				49.7354				32.3412
33.7557						32.1671				58.0679								57.416		59.3143		35.5588		45.7293				48.6449				32.544
30.1155						36.952				52.0582								49.6761		59.2625		36.9453		54.6189				50.4081				34.2609
31.003						35.7653				51.039								48.4321		64.8236		37.6697		52.95				48.2904				32.1298
34.8808						32.6513				43.8569								56.2593		59.5552		38.8299		52.156				47.8734				32.9101
33.3376						39.2957				47.2808								58.4195		58.3779		39.6298		47.4686				48.1573				30.8765
31.357						39.1696				49.9395								49.7446		57.443		39.9296		47.4592				48.9495				33.5495
31.9893						39.7784				42.8444								57.2732		64.0169		35.6862		45.9124				50.9174				31.3355
32.0761						32.7125				50.8405								56.3955		56.2189		38.32		55.0121				50.5763				34.9886
34.9257						39.8382				46.2271								57.8197		62.2707		39.7207		51.8564				48.1908				32.6908
34.703						32.4				49.626								58.2967		61.9749		38.8222		50.067				50.0675				31.1982
33.8758						34.8012				53.9347								58.3346		59.865		39.6041		53.2503				49.0955				31.4987
30.372						39.8407				56.4581								47.883		50.661		36.7621		53.484				50.8132				30.9141
30.8846						34.8058				58.3466								54.5685		59.7917		36.5973		51.4664				47.9788				32.9457
31.4329						38.5758				42.3519								49.4027		61.6913		35.0416		52.9706				49.0602				30.155
33.2602						37.5888				42.7397								51.4425		58.3542		37.1081		49.6725				48.2439				34.5887
32.0924						37.0303				57.7132								48.8444		50.8613		38.0101		50.3637				48.1603				32.4879
32.0385						32.0798				47.7097								57.9473		56.2121		39.1923		48.5204				49.4874				33.7607
31.996						38.889				57.2422								54.7944		52.5046		36.0625		55.0369				49.3075				33.4962
30.0194						38.3077				52.8765								51.9315		62.1198		37.8106		52.4136				49.0883				33.7347
33.8012						39.3996				46.1494								55.7959		58.0784		38.4358		47.6072				49.5521				31.5522
32.8568						39.5623				55.1221								53.7447		59.2142		38.2052		47.9886				48.226				32.8533
33.9489						30.7829				53.0757								52.7352		52.1903		38.8047		55.889				49.8153				31.8022
33.3979						31.5349				51.2815								51.7196		51.1641		35.8782		54.8156				49.6884				32.564
31.7284						38.0764				48.7902								49.5016		56.5168		39.1366		51.3721				49.5988				33.4778
34.2627						37.8483				52.0245								55.4005		58.8058		37.8553		53.8086				50.2344				32.0525
31.7569						38.4655				46.4908								53.6847		58.6656		39.9844		48.4296				49.4265				33.409
32.0053						38.8097				50.3526								53.7378		55.4324		38.5727		51.1791				49.7281				30.6052
31.8557						32.2888				58.293								53.6909		62.046		39.7687		52.3489				48.6066				30.6069
34.5624						32.273				56.215								57.2264		61.6296		37.9172		48.3328				48.1468				32.0352
31.1665						37.2242				46.0804								51.9838		58.81		35.7974		55.074				47.9544				31.8225
33.3637						32.6474				42.0868								53.2163		54.3962		38.8181		49.2706				49.472				33.7042
33.8053						33.9881				48.1256								52.4454		62.9428		36.3758		49.201				49.3794				32.4579
34.0363						37.6252				53.7226								56.3014		51.5949		38.2572		53.7616				48.9281				32.0721
32.8751						37.1252				43.9435								57.4733		60.0997		35.5178		52.7194				49.765				32.6085
34.7159						39.7692				55.1161								49.8535		54.7991		35.3916		49.6665				50.9115				31.5958
32.2309						31.9018				50.3177								54.5164		55.2312		37.0411		54.964				48.6964				33.1008
32.3612						31.1171				56.729								49.9423		56.1485		38.2754		51.3511				48.691				30.189
34.4643						33.0583				42.821								50.9704		60.5829		39.5354		50.806				48.344				31.6277
33.2842						39.2338				58.9109								51.644		59.2565		39.9775		52.5682				50.9879				32.805
33.8434						31.7219				45.9077								48.9158		61.2738		38.4549		55.6926				49.4808				32.0357
32.1853						38.1882				54.8028								55.1206		57.5566		38.7759		50.9552				50.9881				32.3931
32.3281						38.6848				45.8601								54.4138		50.5667		39.377		45.4294				49.278				34.9563
30.5229						39.2474				44.1293								56.24		62.4424		35.4034		46.681				48.0713				31.0597
32.5963						32.9808				48.9014								49.6244		58.9076		38.2812		48.0172				49.3877				34.35
31.1028						33.0703				49.1966								57.7982		57.5749		39.6736		48.0463				50.3245				32.5526
31.757						31.3175				45.7595								58.3589		59.7683		37.8288		53.9889				50.0762				31.903
34.7514						39.966				47.0503								52.5979		54.5979		37.6481		55.1592				48.8867				30.5876
32.7553						32.4492				45.2082								51.326		50.2076		37.8		46.272				48.1812				30.684
33.2856						36.1131				56.5273								57.8868		50.2615		35.7952		52.7735				48.2396				31.7469
32.6966						31.6883				49.7813								54.9318		52.5384		38.1802		53.8785				48.8359				31.5269
32.7637						35.603				46.6923								57.4988		55.4396		38.4001		52.2651				49.5019				33.7763
32.7911						38.705				47.3308								58.4522		54.187		39.3085		52.2949				49.3258				31.6236
34.009						30.184				49.0721								55.7967		58.0407		38.677		54.1881				50.5123				34.167
30.5133						33.6142				56.275								49.5334		51.4904		35.5664		53.6705				49.7717				33.4567
34.6003						37.0928				50.5764								54.8885		50.6734		36.4513		46.1405				50.4797				33.3184
33.5174						30.6957				53.3204								50.0989		62.5945		37.3056		45.5978				50.2315				32.7428
30.1686						33.5112				53.1502								55.1171		54.5525		36.1308		45.4576				49.6423				30.0803
32.9515						30.0744				44.9396								54.491		57.321		35.6397		52.3934				50.8885				30.3155
31.3354						38.8455				42.0367								54.8736		61.5559		35.8603		52.6001				49.7655				34.2725
32.7109						34.201				48.4416								56.6285		62.4608		36.6593		55.1714				50.0959				30.69
34.2525						32.836				54.7772								56.1325		62.0308		35.5605		54.8774				48.834				33.5692
33.9927						30.2189				48.152								54.3817		60.2865		38.2699		54.2824				49.9937				32.8928
32.3148						39.9428				52.6072								58.887		59.3824		37.7096		55.9868				47.9308				34.1212
32.6373						38.0389				57.4413								58.2897		56.7084		37.5893		49.7393				50.7355				32.5661
30.4466						39.7707				45.181								55.235		62.4268		39.8773		47.882				49.2168				31.4269
31.0597						39.5135				44.8692								54.1913		50.4895		38.0325		45.1336				49.6552				30.9061
30.1723						32.7768				58.3181								55.6814		64.4291		37.7494		47.1974				50.756				30.6617
30.2056						39.3353				51.3486								54.9283		55.8337		38.9619		47.5956				50.0164				31.4388
30.0202						37.3966				52.8714								50.5213		55.229		38.8575		51.1507				50.0745				34.3434
34.683						30.7387				54.0922								56.9079		55.1437		35.2386		51.6905				49.798				30.04
33.15						34.4991				46.0257								55.4363		58.4049		39.225		50.029				48.8797				32.9925
33.9974						33.7201				53.2732								51.5598		62.6255		38.8494		52.8512				49.6467				31.2551
32.3596						34.5304				45.2451								48.5203		61.777		39.1672		47.4392				50.5411				30.3645
30.8001						34.4598				46.6785								49.8012		53.2168		38.4796		47.171				49.87				31.2849
32.681						30.0299				56.3573								51.8228		60.4257		39.4242		47.903				49.9188				30.8106
34.6923						32.7414				50.4997								50.3145		57.7276		38.405		54.3537				50.0752				34.2308
33.5113						34.7675				46.2038								51.3448		63.6751		38.5404		53.9847				50.6727				30.8616
31.5732						39.1182				51.398								48.7451		52.6901		38.0006		45.5187				48.8466				32.5086
30.8179						30.6714				43.7352								58.3357		60.9903		36.8987		46.1694				48.9349				30.4759
31.3122						31.6657				55.8447								49.5228		57.5034		37.0995		52.5885				49.5251				30.1271
30.4554						32.4322				54.9175								53.2616		60.8436		36.2922		54.5652				50.5942				34.094
30.0616						36.8321				49.5939								51.1154		61.2407		38.1188		47.2892				48.5276				31.6052
30.7198						37.1596				43.4634								55.5024		50.0056		38.9593		55.8133				48.1848				33.8121
33.7826						31.4817				47.4923								48.0511		53.7173		37.3646		52.4532				48.5195				31.5683
34.1715						37.7204				48.6853								52.1009		61.2816		38.7785		53.3771				50.0479				30.4771
32.5891						35.7784				43.9435								52.3032		54.9987		38.5863		51.6612				48.5759				34.4105
32.0464						30.1438				43.1092								57.9084		50.0022		36.1344		51.2141				50.5958				30.2302
30.4869						30.6306				43.5727								54.6216		51.7579		35.5131		50.2218				50.6297				32.5298
30.5996						35.4997				52.9255								54.6843		64.9831		39.7753		50.1542				50.9735				32.4558
30.0875						36.8608				51.6283								55.9805		56.083		38.2316		52.8025				48.3843				34.5752
30.649						37.8113				48.7996								52.939		59.7122		37.8801		50.7343				49.2673				34.094
30.7401						37.7154				43.6763								57.1535		60.8767		39.9015		47.7574				50.2828				32.3213
34.9668						38.5213				47.538								57.4948		53.4286		35.7552		52.653				47.8388				30.1452
31.1632						30.704				42.1238								54.9171		55.6717		36.6828		47.7221				49.8647				30.889
31.9155						38.8634				52.1125								57.0046		50.3425		37.5104		47.5419				48.4169				30.5779
34.0835						37.9927				44.5546								48.1666		55.7342		38		55.2982				48.8436				31.0055
34.4315						32.4728				52.2543								56.6912		57.9305		36.6411		45.3032				48.5517				31.8874
30.3194						34.8145				57.7402								58.7788		55.4037		36.4745		45.4577				49.9638				30.5523
31.1292						30.9446				50.1585								56.5228		58.8648		38.934		45.3755				49.7505				32.1967
30.9427						31.012				58.3297								52.0443		53.8584		37.3689		52.9646				50.1063				33.7991
32.8326						32.9615				49.8526								58.4735		56.5775		35.8343		49.7728				49.1698				30.9435
33.7939						30.5939				47.4416								55.1481		50.2686		36.5912		45.8532				49.8037				31.2331
30.2294						37.5922				44.2669								54.3629		50.4824		37.2645		55.6703				50.0049				31.6163
32.4353						38.1056				49.9884								48.1585		50.0402		39.2511		46.8313				47.9218				31.4684
32.0046						34.3247				56.7349								49.9588		61.8159		37.4545		52.4276				48.1598				30.4063
31.4911						39.3392				48.6307								49.1816		54.3363		38.2052		51.5247				48.5876				30.7197
30.6747						36.2015				49.2721								53.6679		63.3613		36.39		45.4203				48.907				32.081
32.3579						37.0383				54.8628								50.6766		63.0248		35.1961		45.3442				49.9586				30.7032
30.8886						31.0351				55.9333								58.5795		62.4431		36.4026		53.6883				50.1038				33.5083
32.695						34.8214				48.2915								52.8863		59.3577		36.2029		46.017				48.0446				32.2421
34.7347						34.28				43.4011								50.1926		60.6445		36.0318		55.0338				49.6596				30.9605
34.3285						34.1929				58.0578								54.8552		53.5858		37.0102		50.9997				49.1183				34.4882
31.9742						38.3626				54.5832								54.8464		54.1981		38.9999		55.2466				48.26				32.8071
32.1324						39.5842				52.9952								58.6691		55.7093		36.5976		55.2009				49.5982				31.4151
34.7351						31.5115				53.6129								52.3583		55.8546		35.9262		53.8476				48.426				32.8709
32.4658						32.224				45.9611								52.6704		50.2044		35.3874		52.6912				49.5747				34.8638
30.9903						39.2179				53.5346								55.7301		51.4017		37.7101		55.1414				50.3733				30.1149
30.6218						30.0386				58.9211								49.2438		55.9359		36.8717		52.5623				48.5015				32.6116
31.303						31.6272				49.4382								51.7627		58.3155		39.5271		50.3121				48.7519				30.7438
31.6984						30.6774				54.6419								48.3142		59.3221		39.7032		45.787				50.7968				31.8575
31.1677						39.4393				43.4552								55.8387		60.4497		37.122		48.3224				48.0906				30.3504
32.5596						34.4049				50.7472								51.8876		56.4976		36.4755		53.4823				49.6625				31.401
34.6816						35.714				49.1326								49.4696		50.061		38.572		45.2038				50.081				32.0063
30.4668						32.3269				42.9775								49.1866		50.7902		35.1383		53.3256				48.5129				31.378
30.7498						34.1968				47.8778								56.7564		64.9023		39.4344		52.7812				48.0802				31.8563
31.0584						38.1123				43.7051								52.9418		63.6829		35.4081		52.4246				49.4676				34.6737
33.4766						37.5387				55.4027								54.8507		61.3368		38.5129		49.8405				49.5319				34.5961
32.6207						39.4142				46.5436								58.8722		61.2739		39.8651		48.4227				48.4441				34.5817
31.9183						32.8638				52.3545								58.6671		51.6934		35.5111		50.0621				49.1617				33.8603
33.5843						36.1375				54.0154								58.2267		54.1149		35.6559		49.8533				47.9359				32.7137
34.65						31.0331				52.6239								59.0503		57.7822		38.3399		54.0202				49.9665				30.9742
33.6562						38.4489				50.253								54.5983		63.5201		36.9951		49.0779				48.6674				34.9389
34.4111						30.7461				57.5727								52.254		57.2798		38.6019		48.5472				48.2927				33.5788
33.9217						35.5309				51.6052								51.4504		55.9521		36.643		52.8148				50.1073				32.6852
34.0905						33.7155				54.0888								54.2305		60.6755		38.4391		55.5922				49.9621				32.2474
31.5157						34.7334				56.4236								49.1829		50.827		39.3379		48.7229				49.095				34.7964
32.5711						31.2646				49.5283								53.3576		55.9902		35.5745		51.5688				49.0693				31.6087
34.6576						34.5931				46.6446								48.3673		59.6308		37.8721		54.3029				50.3042				33.6394
34.9079						33.5015				54.4925								58.777		59.6233		35.8684		54.7156				49.6248				34.926
30.4992						38.3548				52.875								48.4239		58.3531		35.8575		55.2209				48.6288				34.9353
30.8491						37.5296				52.6307								49.1849		60.4068		36.1091		55.2496				48.2927				34.7252
31.6529						39.7719				48.4823								48.6335		54.5626		36.4635		49.7361				50.7099				30.55
33.5829						31.9662				55.7963								58.5341		53.8764		36.0576		48.9802				49.5487				31.8609
34.6146						34.2362				50.1431								54.0718		63.1477		36.6579		46.2633				49.0343				30.2655
32.0899						39.2043				45.3319								48.7955		61.6729		35.3486		55.327				48.8446				31.1855
30.7023						33.4697				44.1258								51.067		64.4604		39.1508		46.5059				49.5331				34.7179
30.5402						38.1457				46.7717								48.4287		61.0739		37.6694		52.3657				50.0019				32.5936
30.3756						34.0854				54.5425								56.6035		54.0757		37.986		52.2532				48.8634				34.9931
34.7326						34.778				52.6696								52.1292		61.5037		36.969		55.8615				50.2992				31.777
31.1181						33.9988				52.9046								53.5762		60.4954		38.167		46.1482				49.2998				30.5323
34.622						33.439				45.1421								58.9512		64.3189		36.8599		53.4089				48.5629				32.6165
30.6679						32.8231				42.2221								51.6735		62.8323		39.9408		45.2418				50.2254				30.6895
32.1189						37.1666				50.0582								47.8636		61.3969		36.9175		50.2536				47.9808				32.9039
31.9231						31.8532				55.5118								53.2379		57.0628		39.9049		55.6872				48.9416				31.7962
32.2089						31.5577				44.929								57.2845		61.1518		39.6209		46.8939				48.5493				30.4496
33.2158						30.9548				47.9414								53.4499		63.0312		38.6906		54.3914				49.683				34.7134
30.1807						32.8105				51.9479								49.2894		54.9128		37.9716		51.1251				48.072				30.9862
31.2399						38.9298				58.8855								48.7551		50.6798		36.4353		51.7417				49.5552				31.1544
31.5911						31.078				43.8011								53.816		50.1064		38.1185		55.3712				47.8244				33.9862
31.7675						37.6386				54.4898								49.7873		63.9586		35.2701		46.8848				49.453				34.0651
31.437						33.6026				57.3977								54.9779		59.7119		37.5734		50.3581				47.9944				30.0668
30.459						39.1037				50.7106								57.8677		59.5681		37.0961		53.4547				49.4846				33.5517
33.5165						36.1726				54.0111								57.2783		51.4481		39.143		51.3889				48.9609				32.3896
32.1419						34.3639				44.9134								56.4027		58.825		39.1182		52.4683				50.9906				34.5406
34.1451						33.9519				44.9308								57.3324		60.0181		35.6768		52.7379				48.6724				31.0786
30.5628						34.8531				50.5039								53.2348		60.5258		39.9842		54.4463				50.7147				33.8448
31.1467						37.4662				45.4912								54.9474		52.764		35.6601		48.6441				48.0295				33.533
31.0481						35.1582				52.6252								55.5984		55.5708		38.539		52.4629				50.22				31.8761
31.0692						33.0021				52.4754								48.2253		61.4903		35.965		54.0511				49.4511				34.0711
34.7681						37.0769				44.7963								50.6449		52.4113		36.5254		47.3107				49.9937				31.6409
34.6073						33.8871				49.0436								49.3811		57.6852		39.7921		49.1209				48.398				32.82
32.9742						38.789				51.665								53.8599		60.5938		37.8409		53.5721				48.322				33.6981
34.1558						31.8903				57.3621								55.7996		54.8264		38.6597		53.34				48.0931				32.6963
31.6927						32.6904				56.3682								57.9789		57.9867		37.4418		48.2961				49.6436				31.852
32.5446						39.9854				42.4508								56.705		54.2668		38.5753		48.7234				50.0593				34.9775
31.1343						31.0492				44.1737								57.4132		62.1523		35.2381		54.9401				50.8224				30.3398
30.2248						30.4159				51.0611								55.7124		61.1773		39.8829		51.0834				48.676				33.9209
30.7381						30.1595				58.5398								50.9081		51.4934		38.245		55.0591				49.7244				31.5507
33.4793						38.6202				51.6086								50.133		53.823		35.1332		47.2046				49.6252				34.295
33.574						36.4431				48.3567								47.871		59.3724		38.0302		54.3915				49.5876				32.7516
34.6318						38.5402				48.5605								49.3678		50.8519		38.8622		50.3301				48.8615				33.4347
31.821						36.6485				42.1004								48.2054		63.9439		36.7673		51.4059				50.9179				33.1055
32.3301						35.5385				45.0306								53.0227		60.1486		39.6798		49.7749				49.8195				33.4064
30.949						31.9487				53.7345								48.9146		57.1094		38.037		49.1157				48.9491				34.4387
32.6039						31.7115				45.8988								50.0675		63.4367		37.8593		46.4702				50.507				30.2809
33.3164						38.3934				49.8113								49.8166		51.7703		36.5471		48.3372				50.894				33.5667
33.4956						39.0471				43.4161								52.7678		52.7207		35.2281		52.3891				48.9186				30.8553
32.3806						34.8243				43.3564								49.7041		59.0207		39.6206		47.5597				48.6621				32.9215
33.7545						32.8364				57.1391								58.4326		63.8342		36.2767		46.3945				48.4386				31.6096
30.9245						39.2524				52.5264								50.7824		52.6179		38.5786		55.4906				48.6186				34.1996
34.1822						31.4277				52.9538								50.1064		53.8478		39.9112		47.1042				48.8448				34.2863
31.4394						39.4777				44.7966								47.8888		59.8912		36.4612		47.6809				48.6092				31.1644
34.128						31.4126				58.8233								53.1647		56.6122		39.66		53.9106				49.9591				33.3708
33.5158						38.603				42.4957								47.9144		59.5861		37.3645		52.1014				50.066				30.4367
32.2621						32.6385				53.2012								53.0491		62.7024		38.9532		54.164				50.5937				33.3379
34.3514						34.9752				45.4772								53.4313		58.1197		38.7791		51.1623				50.8865				30.1054
31.8443						39.311				51.0409								54.2838		60.6547		35.5014		49.6316				48.2855				30.0353
31.9719						38.0968				50.9205								56.0079		56.5718		36.4783		49.1404				48.8644				33.2796
30.0523						35.6412				57.2253								52.1086		58.2825		35.5799		48.623				48.9645				31.0145
32.9982						39.2887				51.2575								55.0877		53.8264		36.8234		54.6016				48.3251				30.8026
33.6274						36.7041				43.0038								50.1004		61.8872		39.0746		50.7168				50.1682				34.604
32.1255						37.207				53.1736								50.3357		51.5006		39.6062		53.1665				49.3969				30.4445
33.5296						35.8014				45.1494								50.9417		64.3116		38.5488		54.8794				50.8957				30.6852
32.2125						39.2269				46.8302								53.8381		56.6323		38.6222		54.9791				50.0917				31.9783
34.4333						31.3618				42.5738								48.1224		59.2317		39.6965		55.9374				48.9907				33.3182
33.528						39.0702				42.0092								58.402		62.9204		36.7917		52.4252				47.97				30.0761
34.4313						32.4872				52.0763								53.4145		58.4441		35.895		45.0142				49.8535				31.2634
30.8297						31.7508				55.978								52.7895		57.86		35.654		48.6073				50.0577				30.5539
34.9184						32.3637				52.26								52.1121		50.5091		37.0784		49.5185				50.9649				30.95
34.5889						31.8538				58.358								56.1641		51.6468		35.2759		50.5966				50.6582				34.794
32.1046						32.3956				51.5924								51.0498		57.6941		35.5958		49.1991				49.8409				33.5489
30.1753						39.2115				52.5402								58.4867		61.3235		38.703		49.3892				48.7896				32.3187
30.9141						30.1254				42.1707								47.9008		50.6361		38.7514		46.8979				50.8859				30.9113
31.5113						36.0843				44.3351								55.852		51.8575		35.9926		53.6183				50.6366				34.2803
34.9029						37.5841				56.8392								55.1533		56.8494		35.092		51.7662				48.6157				31.5787
34.175						36.3097				43.161								53.3988		55.3975		38.5089		48.5166				48.7286				32.7771
31.1225						33.8005				50.4024								48.8189		54.5151		37.8467		51.576				49.1105				33.3401
33.6604						30.0042				42.1774								54.7363		62.4692		38.4772		52.0552				49.8607				33.9276
31.5858						38.8917				56.8466								55.9625		62.4616		35.5671		55.7973				50.3276				30.9457
33.4232						34.9293				48.0062								48.0874		51.1557		35.4925		47.0568				50.0372				30.9106
32.2758						34.1801				56.5125								53.9571		50.8089		35.4496		50.7954				50.4078				31.1242
32.5087						37.9175				57.2253								51.5985		60.8975		35.1713		54.8056				48.0283				33.3401
32.1353						31.9238				45.0936								51.3415		61.6045		39.2912		52.9306				50.3851				30.8424
32.4194						31.1936				44.6191								53.9962		56.5021		39.8323		53.9334				50.0179				32.5386
32.4302						36.5363				53.8914								50.9133		58.134		37.5494		50.8601				48.4929				31.9657
30.9173						37.4081				48.6012								53.8371		63.1822		35.9665		53.5108				49.7968				33.1629
30.7603						33.6308				51.7754								53.403		51.7434		36.2096		46.47				48.7506				34.8282
33.2535						34.219				58.6099								53.0314		59.2099		36.9661		51.069				48.9301				30.4271
34.7604						31.1289				49.9522								51.331		52.1151		36.8659		46.2456				49.4576				30.0419
31.8185						30.2595				42.0866								52.1189		55.5686		39.5206		53.7997				50.8408				32.9268
32.5858						31.9633				51.4946								55.903		56.5374		38.004		51.4335				48.5068				33.3779
33.4614						32.2248				58.5899								58.9941		56.4851		36.2099		48.4532				50.1472				32.4211
30.5733						33.4493				58.4747								51.1015		51.9739		39.1517		49.9181				50.7624				32.8879
31.6792						32.6156				57.485								54.2453		55.2934		36.3235		45.7311				49.7693				30.6415
33.0097						39.7638				47.3636								50.3875		61.9726		38.3036		55.5354				50.5983				33.7357
30.4028						31.2194				48.7084								57.4931		54.622		36.8511		52.466				49.3624				30.5438
32.3533						34.3859				51.8892								55.927		60.9778		37.595		51.6638				49.8008				31.0184
30.3335						37.4088				42.386								48.5471		53.2085		37.4381		48.9376				48.0553				33.2379
33.8772						36.8635				42.6574								51.4177		56.6506		39.2581		50.4146				49.636				33.7472
34.7925						34.3142				56.162								57.8895		52.8944		37.4926		48.6466				48.2259				34.7495
31.4668						37.1641				52.7921								50.7316		56.3795		38.7886		47.5286				49.5536				32.2816
33.7131						37.2995				48.2456								52.3922		59.5194		38.2849		47.7935				47.9272				32.1859
30.1693						39.0699				43.6472								55.8936		53.6866		39.7646		53.904				50.9799				32.7161
33.4378						30.7305				49.1869								50.9807		58.9714		35.4671		53.923				48.2242				33.633
31.1797						32.6785				57.8707								57.813		63.3658		37.205		51.5795				49.4804				31.9914
34.5881						30.9792				43.8982								58.4826		59.6584		36.1299		53.6717				48.5223				30.252
33.1823						35.0941				52.3328								52.0468		54.833		37.1745		47.7075				49.0104				32.3671
33.464						33.0114				42.9328								55.6		59.545		36.7895		50.7029				48.6281				32.9933
31.0192						38.4273				47.7278								51.1814		53.6965		37.981		50.6145				48.2036				34.807
33.5253						39.2943				47.2969								54.5565		52.4673		38.9882		47.4531				50.4446				32.524
34.2377						33.5641				49.8188								52.6019		51.3381		35.8134		46.8508				50.5944				32.7095
31.673						39.3404				45.3741								54.3442		61.4403		35.1528		54.7722				48.1682				31.7578
30.9254						36.2655				53.6998								51.8235		50.0134		35.6262		47.0037				49.924				30.3079
30.4013						39.1269				46.2886								52.5902		52.9486		36.8879		54.2849				49.5854				30.5929
33.3454						32.6628				50.7531								56.121		61.7009		37.56		48.0909				50.1186				34.27
33.0802						31.5144				55.5617								51.2694		56.661		36.3581		53.4607				49.8011				32.2328
34.9704						38.8697				55.1459								52.1933		59.8948		36.4405		52.374				48.3678				32.1395
31.4409						34.1059				51.5575								49.4202		55.1366		39.0222		45.0198				48.5008				31.0868
30.2309						30.1087				57.0241								59.1826		55.1025		37.4032		51.8665				48.1514				31.1656
30.7276						30.0784				48.3242								58.6468		53.6343		39.8367		51.0794				49.5224				30.6739
31.8981						36.9636				47.2369								49.3257		59.9023		39.4656		50.0211				47.8866				34.7139
32.0092						33.3231				50.3824								56.0392		55.5462		38.7423		50.7655				48.5228				34.3624
30.1367						33.8239				43.8551								49.871		54.891		38.8245		45.2377				48.3275				33.3376
33.021						34.9222				45.2265								50.7477		62.7651		39.6596		52.0657				48.3459				30.3262
33.5674						37.593				56.6515								51.9254		55.3176		35.6277		51.1135				50.9445				33.4257
33.5439						31.3764				43.4039								53.5022		53.6443		35.7051		45.8379				49.6429				32.2177
33.1585						33.1649				50.7612								52.972		63.1292		36.4169		49.3083				50.337				30.9479
34.6537						32.4968				56.1066								54.0753		52.7181		36.9671		47.6922				48.3866				32.0747
32.508						39.6245				42.228								58.4929		61.9754		38.0115		48.1551				50.1652				34.3953
34.0749						31.6891				54.5955								52.834		55.3327		36.5459		48.8865				49.0562				31.9392
30.9364						31.9643				57.847								53.1892		54.083		38.6644		47.9				49.4634				31.8343
34.3758						34.6792				50.0844								54.3443		55.7892		35.6171		47.8781				50.3464				30.4109
30.1577						31.8777				55.7834								58.2779		63.437		37.7424		54.9462				48.6584				33.3162
31.2311						38.5243				50.72								50.7259		52.3278		37.1596		48.223				49.4993				33.3653
30.9096						34.7624				51.7701								50.8719		64.456		38.4474		46.9592				49.8712				31.0266
34.0562						38.9836				53.5519								55.676		62.7817		36.8987		45.9101				48.9175				32.9653
30.9531						35.0743				44.0718								49.8957		59.3132		37.365		48.5006				48.8051				32.9651
34.7069						32.3758				43.5075								49.6107		63.8037		36.9303		54.2202				48.8285				31.9675
32.9591						37.2696				52.0823								55.1759		58.767		39.5237		48.4564				49.3683				34.4719
32.8877						37.7363				53.051								48.2179		61.6993		39.7864		54.0781				50.2505				30.5561
30.9157						35.6406				51.7877								48.9838		50.7967		36.6207		49.9034				50.818				33.2558
34.0266						31.7373				49.6316								54.1876		56.3212		39.0724		47.77				48.9012				32.1146
33.026						36.1963				48.578								50.8859		50.0646		38.3298		55.7027				50.3865				33.1914
31.0763						31.3782				50.9133								54.6756		64.0867		36.0502		51.6164				49.0957				31.6996
32.3879						37.5452				50.1184								51.5044		53.862		36.1945		55.2484				48.6047				31.998
32.7868						31.7803				45.297								52.5546		50.3153		37.8318		49.6728				48.5941				31.1321
34.7061						37.3692				53.0233								57.429		58.4727		36.1979		51.4983				50.5099				32.0224
30.7646						39.6259				47.8671								57.2623		53.3682		36.2715		48.4262				48.0994				31.0187
30.1571						34.7153				53.9981								55.6124		54.5401		38.7003		46.592				50.1807				33.7458
32.8784						36.9108				50.7892								49.8676		59.3617		35.168		49.192				49.4854				31.9713
30.7497						37.5279				45.7514								56.8644		55.7912		39.2279		49.1144				48.5979				33.8947
34.7442						37.3444				50.9486								56.775		58.4089		36.016		55.0549				49.5491				33.4721
31.5857						32.3939				42.3648								53.1308		55.8206		38.0109		49.4064				49.2717				34.4175
30.1543						33.0249				48.901								56.0317		62.8473		38.0991		51.7455				50.3771				30.7552
31.2811						33.08				57.3807								49.0522		58.9255		37.3909		51.6802				49.1627				33.092
31.3522						38.0024				50.6655								55.931		61.9447		37.0757		53.5993				50.9291				33.1877
34.8307						32.4932				53.2966								49.0459		51.2454		38.275		55.5515				47.8008				32.3568
31.0476						35.8167				43.1178								48.7893		57.9336		35.8058		53.2395				48.4699				33.2937
32.2046						37.0898				47.4649								54.8394		59.0741		38.9428		46.0908				50.1299				31.5035
30.8409						32.897				43.459								53.66		56.2709		35.3027		48.1659				50.082				34.1697
34.4748						36.4625				48.1149								54.5206		64.1991		39.8961		54.391				48.0203				34.2787
31.3379						31.1421				46.3775								53.7789		51.833		39.2091		45.5871				48.9194				34.1311
31.8713						39.9343				55.1113								56.043		64.8062		35.7801		47.1686				50.2051				34.2536
33.4131						32.7894				49.5979								57.1076		52.9227		38.7839		51.8858				49.2305				31.8716
31.8143						35.4352				45.8691								49.1303		55.8827		39.8571		52.1378				49.0538				30.6526
33.5907						31.3969				47.3749								56.8482		54.4135		39.8259		54.1865				48.8632				33.4317
31.2092						30.593				47.6293								48.1452		56.7792		35.6891		50.7084				49.7251				33.2081
31.9277						37.2262				48.3167								48.0151		61.034		39.2621		49.1001				48.4969				32.2862
34.1761						37.9874				52.2561								49.6076		56.7972		38.9396		49.1615				50.5888				33.5414
30.3728						38.1866				44.4004								48.2165		53.0677		38.9043		45.9378				49.0471				33.5695
32.7523						33.5186				43.2571								53.7681		53.6783		37.8824		45.4256				48.1681				33.5556
32.4841						38.6256				50.7072								56.1675		56.7104		38.2835		51.6944				50.6391				32.0939
30.6724						30.4283				50.2426								57.4974		60.54		38.4169		46.5824				50.0598				32.4212
31.9896						32.342				46.1796								57.7208		61.1961		39.1654		49.225				47.833				32.2975
33.3255						30.5916				53.8573								56.4846		52.8587		39.418		49.927				48.015				33.3879
34.7861						38.765				49.9096								53.4674		50.9633		36.8974		50.2374				50.7066				32.4642
30.0991						33.9548				47.4138								51.4117		64.6151		36.9351		48.5397				50.7996				32.3505
33.5546						35.2563				45.9795								51.4912		63.0965		38.3421		51.5458				50.2568				30.9496
32.9919						37.1913				56.1091								58.3883		64.9536		35.2387		46.6102				49.9882				32.2238
32.0729						33.5022				55.1089								57.6695		61.341		37.2246		46.7695				50.3358				30.7766
31.5409						36.7341				47.193								51.2422		61.144		36.1804		51.8393				48.1748				31.5436
30.76						38.0499				54.8724								56.3049		53.423		37.8301		45.9454				48.9903				32.8547
34.5374						35.7337				56.1051								58.532		59.0431		35.7746		48.8754				49.1217				31.3081
32.6691						33.5708				47.2926								51.3306		58.8212		35.5812		47.037				48.74				30.6916
33.8841						37.2569				50.3943								49.3831		62.0863		35.8445		55.0271				50.7702				31.0129
34.1654						33.0058				57.6546								51.4922		50.8643		36.7563		55.3864				49.6784				31.1602
31.6622						37.7823				55.7826								58.203		58.2127		38.881		51.713				47.8382				30.4648
31.18						30.5277				51.0376								50.6777		56.9431		39.4689		51.0873				49.6169				32.1204
33.539						32.0231				52.7603								59.1815		54.2345		39.944		45.9195				48.7569				31.635
32.0946						37.6407				53.9996								53.0416		62.7392		39.6516		46.4097				50.8621				34.255
30.663						36.4223				48.3182								49.7269		53.9782		37.692		55.8999				49.5341				30.8914
31.7872						31.4547				47.4099								58.1785		53.8925		39.2579		52.7547				48.4565				34.5637
31.474						30.2526				47.2888								57.5898		51.7649		39.0051		47.8007				50.0062				30.0164
31.4097						36.0165				57.9098								48.8337		60.537		36.5695		48.9902				48.2586				34.5453
31.2847						30.564				43.6785								51.6848		58.9014		39.1632		52.2521				48.7546				30.8403
33.6638						35.114				49.7336								53.3458		50.6077		37.6932		50.8076				49.1124				30.0936
34.377						33.0777				56.0174								55.8209		51.6715		37.7095		48.2474				50.0229				32.4306
31.5715						34.4053				52.6979								58.1823		63.4001		37.0922		48.3532				48.8232				31
34.1357						30.7809				55.1703								51.9197		63.5982		37.4181		55.9484				49.5268				30.2327
32.6566						39.8097				57.2869								57.7457		52.5534		36.8733		45.9031				48.7466				34.3571
31.2181						32.5619				56.2643								55.3141		61.1494		37.0121		50.9195				49.0462				32.3553
34.1146						32.5923				43.9902								49.1762		51.7605		39.9946		55.4256				49.0847				34.5865
31.2022						39.9154				56.8739								49.1748		64.9859		38.7571		52.7666				50.4085				34.3559
34.5693						38.9452				55.9152								50.5658		54.3362		37.3248		51.4683				49.3959				30.4047
32.6579						39.7803				45.7568								50.7632		62.519		37.5521		52.7224				48.9551				31.0924
32.6244						30.4035				57.5233								51.3755		53.7155		39.361		55.9502				49.8397				30.34
33.6235						37.6177				48.4259								58.8583		58.4508		38.576		54.8336				48.4878				31.1875
32.9353						35.9422				44.1939								54.4979		50.2784		37.5742		53.9422				49.1807				32.0873
32.9882						34.8399				47.596								48.6065		53.1325		37.8986		52.7471				49.0759				33.4129
34.1631						35.1536				57.2193								49.4472		52.9002		35.274		45.1855				50.2174				32.9669
31.3866						30.7782				51.0257								54.059		63.307		39.9704		48.6368				50.6222				33.15
30.6057						36.0557				51.5679								52.0444		51.2044		35.9148		49.8449				50.8094				34.0404
33.4952						35.8169				46.6841								58.0068		54.2936		39.6703		45.1042				48.7297				30.6324
34.6432						33.7094				54.0401								57.4071		61.2739		37.8716		48.3311				48.5482				31.8303
33.3868						38.2498				54.7998								53.3605		60.7262		38.1683		53.3256				49.6417				30.4993
33.0345						34.6931				42.2559								56.3908		51.3013		37.2906		46.1078				50.1805				30.8126
32.8077						32.3443				53.1876								54.2867		55.8646		39.3155		47.4366				48.5305				30.102
31.2082						33.8				50.7633								53.7102		53.9574		37.1168		50.932				50.6517				33.9627
31.6809						34.4119				53.4881								55.3553		63.2199		38.1481		51.8054				49.5157				31.89
34.7661						30.3548				43.6004								52.7876		63.4208		39.0415		49.2462				49.8761				33.9205
31.832						37.9753				44.1365								56.0989		61.3304		39.699		49.6668				50.1351				31.5779
34.1702						36.1207				43.5666								50.6566		64.3744		39.93		51.4945				50.2348				30.5657
34.1744						37.5541				48.5172								54.054		52.5797		36.4207		54.357				48.52				34.1721
34.1571						34.0668				58.3893								50.3349		58.2999		36.0804		53.5407				49.9663				31.4259
32.3855						39.2135				54.0146								59.0823		59.4493		39.5666		45.1245				50.6291				34.4511
31.9645						37.5983				55.7094								53.0351		63.7985		36.2144		49.3579				49.6857				34.0258
34.4937						38.2809				43.4457								55.4644		64.7083		35.6654		45.9099				48.7447				32.5117
30.5462						38.5587				50.693								54.675		57.8043		38.8155		46.8421				49.0393				32.5577
31.085						38.9962				44.666								48.4083		63.7366		38.0339		47.3982				48.3831				34.9713
30.5864						31.3235				46.287								54.5409		56.6433		37.4705		47.9454				50.7636				31.9565
34.7438						35.124				48.7755								52.9284		55.3104		38.3841		51.5798				50.1097				33.1635
32.7476						37.7789				56.066								50.137		54.0563		35.2942		47.9857				50.4828				31.4411
30.4689						32.1734				44.1777								53.0833		50.7374		38.1617		46.2968				49.5817				31.5063
31.7365						32.4793				45.1521								49.6634		62.711		35.0461		52.4646				47.906				31.934
32.6885						30.0603				48.0164								52.4697		50.3149		35.2862		55.0307				48.3454				30.7446
33.0768						33.2139				43.0026								54.3796		53.2745		36.4468		48.8349				48.3919				32.1464
30.7117						30.5524				44.0608								56.9544		59.2676		35.3971		52.5688				50.3035				32.6551
34.7432						31.0109				43.9557								58.766		60.1601		38.3278		53.4421				50.3419				33.5792
33.0425						33.1272				50.0121								56.1435		56.5542		38.4154		50.3563				49.4856				33.4748
31.1503						32.5935				42.4841								49.0499		64.017		37.0586		51.167				50.0752				34.9265
30.1641						33.1363				49.9632								50.8641		63.8532		38.4623		48.076				48.8261				34.1559
34.1535						32.8898				50.9343								49.4392		57.5877		39.7331		51.6758				50.4114				32.4435
32.005						38.4276				53.2414								59.1859		52.2701		35.4511		53.0669				49.9935				34.4408
32.0442						35.4745				43.8246								58.9611		60.4691		37.0658		53.2192				49.0113				31.0406
34.4214						38.6986				47.9065								51.6813		57.8119		37.0312		48.6258				48.8036				30.5565
32.8648						39.2484				53.6492								48.7934		64.3685		36.015		53.3136				49.8392				32.8953
32.6071						37.5515				45.8513								55.0211		61.4644		39.9537		55.7665				49.4954				30.6428
31.9384						36.7647				52.2174								56.3294		62.3546		38.3674		53.284				50.3035				33.1359
34.8621						30.6466				52.8273								59.0628		55.7335		35.7723		53.6116				50.2971				33.1933
30.2324						34.595				57.7226								48.0682		56.9108		37.1943		47.5462				49.4466				30.4653
33.9235						35.8335				53.8742								51.0142		64.4741		39.8891		53.5175				49.4262				31.9645
34.3621						36.0648				50.3949								56.1502		64.0223		38.8897		55.9613				49.472				34.7449
33.1616						34.9082				58.8242								52.7354		64.5801		36.4432		51.534				48.4962				34.3347
31.5331						34.113				44.528								58.356		55.8187		39.8107		46.4608				50.8224				30.5494
31.9521						31.9894				43.995								54.3837		58.5084		35.8724		49.2702				50.4253				32.304
34.5364						37.4845				47.8615								48.7862		56.54		36.2921		53.8668				48.1294				30.6172
30.8992						38.6177				51.9006								51.7324		60.8784		39.2402		55.2279				48.0032				34.8773
33.4161						37.5451				44.5252								53.9461		62.184		39.962		50.244				49.7476				33.6848
33.7342						37.0459				48.9112								58.9792		58.1899		38.75		45.5069				48.8341				33.5039
32.0318						35.3493				44.2729								57.8866		59.7422		36.5638		52.5823				50.9072				32.2389
33.9163						30.1781				42.1666								51.7009		59.2477		36.7313		53.5677				49.242				31.3689
31.0504						35.008				55.8435								51.6554		63.709		35.8655		46.5821				48.4202				30.6315
34.9782						32.8452				47.1844								48.6617		59.9839		36.5876		47.3606				48.6683				34.891
32.3778						30.9603				42.6957								51.4339		60.3591		38.9461		50.3863				49.0564				32.1842
33.775						32.4577				44.4146								50.8924		56.2269		35.7706		54.2472				49.8639				31.6924
30.0077						33.4823				58.7344								56.5406		54.779		39.6687		46.8866				50.4093				34.3338
32.5556						38.4291				52.8393								48.734		64.1665		37.3598		48.3073				49.035				30.7933
31.7682						39.7439				46.1423								58.2805		54.6853		36.1915		53.7128				50.8706				32.9224
31.9478						39.8601				50.0072								54.1078		60.3039		37.9212		48.5679				49.437				33.8211
34.362						31.5192				49.3339								51.0783		64.9121		38.0759		50.4677				48.8271				30.7651
34.8066						32.2033				50.7397								52.1528		56.6287		39.6056		50.8187				48.5735				30.466
30.6363						36.5937				47.3142								54.0692		60.059		38.1309		50.5106				48.7338				33.9825
32.1911						31.7368				55.8226								55.4224		55.9044		35.9954		55.3471				49.7529				31.7704
34.0313						34.9132				43.6157								53.5069		63.801		39.2559		50.9282				50.3678				31.7496
30.2232						37.9916				44.1861								57.1847		63.7584		38.9487		49.1373				49.5669				32.9099
33.6797						32.0877				43.8002								49.8174		60.5103		36.6646		50.7181				47.8425				34.3996
30.6147						30.3961				46.9393								50.5278		57.8093		35.489		53.268				48.4278				30.1678
30.799						37.8501				54.273								57.2142		63.4137		37.2637		50.5382				48.5381				33.6214
33.369						38.0397				57.9711								54.715		52.7953		35.8638		45.4977				48.1384				30.7277
31.901						34.995				43.9813								54.1617		54.6445		39.366		50.9507				50.9575				30.0989
31.0984						30.4401				58.4074								55.4141		64.2246		36.7603		54.747				48.1432				34.1511
31.0111						36.1724				45.0782								53.8685		53.4099		36.1932		53.3728				50.5334				31.1573
33.8122						37.1814				53.9678								53.595		64.7237		38.642		51.9446				50.7036				32.3871
31.5288						37.3648				54.9684								50.7127		58.1942		37.7341		48.8608				50.4451				32.175
33.1495						33.0824				53.1387								58.3904		61.7473		39.2369		49.8902				49.5547				34.599
30.3623						30.6673				54.074								53.6584		58.5503		39.0565		46.0593				48.9146				34.6226
34.2722						38.449				44.0601								51.1384		51.1286		35.819		54.0241				49.1551				32.2786
31.8737						36.6837				54.7999								47.9532		50.4853		37.5876		53.7247				49.5558				33.463
30.719						38.3194				56.2648								52.5756		58.8566		35.0685		45.5765				49.8585				31.4481
34.1122						32.0394				53.2464								53.2338		56.0125		39.4802		48.2831				49.4958				32.0542
32.6347						39.6536				51.2797								57.3049		56.8087		39.1793		51.2107				49.4853				33.9542
32.8227						33.1481				50.7322								49.2038		61.0793		37.5053		55.8514				48.1707				32.8338
32.7845						38.1452				44.0421								48.595		57.0477		38.4787		45.2344				50.9896				34.0767
30.0501						30.4175				46.1894								53.9072		64.8183		35.2885		54.8484				50.3662				32.5424
33.8949						31.414				53.8539								58.2726		54.0878		35.3527		49.5445				49.1195				30.9462
31.5004						31.1114				50.0958								53.3264		57.8048		37.1049		48.4701				48.3643				30.8493
33.2129						37.6081				52.4642								52.3819		53.3473		36.5276		46.0176				47.9993				34.7795
34.1536						39.7122				42.8019								50.7584		50.1156		37.4036		48.4763				50.1875				32.162
34.9718						30.2206				57.2288								54.4751		62.6929		39.9126		47.1663				50.6408				31.9637
31.7325						39.5529				54.695								47.908		55.3466		37.2013		50.5903				47.8363				30.6084
30.0528						33.614				57.3109								54.5923		62.3864		37.5981		54.6818				49.9829				30.4741
32.088						30.0863				57.7263								50.4425		54.9393		39.6656		46.9168				48.0591				30.2636
31.5066						35.379				58.4639								54.4904		51.675		35.544		54.7437				48.7562				32.5738
33.0294						32.5294				53.3028								51.0511		64.7186		36.7566		45.0723				47.9787				32.6007
33.6516						33.409				44.5103								56.6041		56.5931		36.4565		51.0769				50.097				33.2405
34.7316						30.4408				43.9054								52.5225		63.3198		37.1304		49.504				49.9681				31.9734
31.4471						31.4632				46.8467								58.1976		57.8508		35.0539		49.388				48.8381				30.1447
34.9255						31.818				47.2965								57.0593		57.3312		37.6718		50.6158				48.6691				30.8655
32.1703						34.7347				46.9687								54.3089		59.7251		35.7826		46.9136				50.8444				32.9976
33.7627						39.4548				42.2588								57.0917		58.6745		37.472		50.3535				48.0229				34.5484
33.5337						31.288				54.4673								52.6093		53.5067		35.0386		50.0667				49.7279				31.1725
31.7096						31.4916				58.5248								51.7181		50.881		39.082		54.5894				50.8074				31.5361
31.6959						38.5988				55.4289								57.4168		56.5783		38.8943		50.0942				50.4172				33.052
32.8284						31.7644				43.9876								49.9103		52.1369		35.1052		49.1634				48.8039				30.9538
33.7364						33.1423				51.3314								49.6538		58.2387		39.6272		49.5096				47.9785				34.8272
31.2079						35.5296				51.3194								50.1438		59.2144		38.1722		53.9684				48.7608				30.1997
30.3265						31.4305				55.1321								51.2456		56.8789		36.5649		48.7606				50.5079				34.168
32.0409						30.4412				43.3219								50.6804		51.8298		39.5602		55.7802				50.6447				34.3915
34.5415						38.296				52.0912								58.4876		56.8911		37.5157		54.7478				48.6571				34.1943
32.514						36.222				58.9544								58.1197		50.6139		36.9754		47.8225				50.545				34.4134
32.1332						32.5568				42.6566								51.9505		56.4816		37.1709		54.588				48.323				34.3135
30.1957						37.4537				42.9271								52.8199		52.9346		35.3438		54.8737				48.5762				33.3928
34.6012						33.161				52.3885								50.7345		61.8641		36.9289		45.5853				50.6859				32.8488
31.3106						34.2732				51.441								55.5605		57.2846		35.925		55.1642				47.8138				30.567
34.4917						36.7236				54.9143								54.3258		52.0083		37.8261		49.7225				49.1776				32.0521
34.3001						38.0296				46.6777								51.8341		53.185		36.1726		54.9479				48.1359				33.6768
32.3169						30.8217				43.7745								57.8453		63.0357		35.2812		51.0403				50.1395				34.2384
31.786						38.7405				54.8751								49.1139		55.5342		39.0372		45.612				50.1303				32.8366
32.4823						32.2903				52.5065								54.6385		58.2989		35.5104		49.7505				50.3981				32.8349
34.0572						35.8104				47.3608								50.5312		64.266		35.1674		51.6257				47.8185				32.9346
30.1677						34.201				47.4071								52.17		60.9531		38.9708		51.8729				49.2202				34.3899
32.2989						36.4584				55.8657								52.5554		58.8024		36.3738		53.1449				48.1094				30.3214
33.5122						30.1385				57.9393								50.9178		60.6281		35.8513		47.5171				48.8118				31.1712
34.3036						38.1328				54.9134								55.2439		59.3721		38.2665		45.139				50.2867				33.4887
33.0187						39.4723				52.078								51.3803		53.1509		36.2327		51.3204				49.8635				30.2283
33.3568						30.892				43.2974								54.0401		59.117		36.6074		45.4106				48.7791				31.7993
33.1682						36.3216				43.2014								48.1063		50.6966		39.8521		52.8456				50.684				33.0798
33.7213						34.1177				53.2997								52.3327		55.6493		35.1603		50.3331				49.2201				34.2851
32.4745						30.2304				55.6146								51.8516		61.3296		38.3548		51.6242				50.0774				33.4668
30.1982						38.6789				48.1047								57.4181		50.0848		38.3406		50.7867				50.7015				34.0359
30.7913						39.2501				50.6096								55.1215		59.8876		38.1006		52.2786				50.6509				34.0209
31.0737						32.2046				44.4092								54.4558		56.8817		38.809		46.8257				48.2102				34.451
31.5147						32.4169				57.3157								58.573		54.6353		39.002		53.8153				48.0826				34.1247
32.3073						30.7614				45.3071								53.8253		54.7172		38.8447		48.596				49.4544				32.9258
30.1017						32.5684				42.4344								53.6974		63.4644		39.4727		52.5651				50.9192				32.4578
31.7953						31.2207				44.1163								52.8461		51.9864		35.1443		52.4051				50.0322				33.44
30.664						31.9619				46.694								48.4014		59.9762		39.0313		50.4065				50.8037				32.094
32.5781						34.482				48.8698								49.7554		54.9991		36.1895		47.7172				50.9823				30.9452
31.9751						33.1176				43.6879								49.565		60.0306		35.04		45.1539				50.9056				34.5764
31.781						38.0522				42.4448								52.155		61.1518		38.0019		54.2052				48.4153				33.1334
32.8447						36.7952				55.525								52.9631		55.9694		37.3133		46.7093				49.6453				31.6623
34.5959						33.9601				43.1434								56.3391		57.0041		36.8503		54.3167				49.5325				32.1254
30.9646						38.2233				57.8786								58.2503		50.8783		39.5623		52.5831				48.1076				33.7098
31.6783						35.4671				54.8893								54.9607		54.8495		38.8737		55.9113				50.3827				31.6274
30.1929						31.115				47.7279								58.1048		64.1882		36.4525		47.5516				49.3217				34.267
31.3165						39.4297				52.5259								48.7657		56.0778		38.8302		53.734				49.1159				30.2123
32.7869						38.3755				48.8321								56.2789		62.9602		37.2833		55.9627				48.4323				30.814
31.1706						30.0761				56.8493								48.3018		60.361		37.6721		54.0854				48.4369				34.2986
30.2644						34.1532				49.2949								48.3592		58.5818		39.3187		54.2494				47.8716				30.0151
34.9094						35.495				51.8794								51.2318		52.9421		37.8142		51.9202				48.8482				33.0918
34.7936						33.2628				58.762								58.6543		52.3547		36.4657		51.1929				49.328				32.6622
34.8198						39.2355				45.2952								51.0803		50.519		38.8065		54.4138				50.2336				34.8996
32.9029						34.4894				43.2414								49.7845		62.3018		38.5329		54.9191				48.4891				31.0106
34.4402						37.1026				57.21								57.997		61.9247		39.9788		46.9436				48.8745				30.2038
30.9583						30.4739				55.8798								50.1301		52.6288		39.7014		46.9111				48.6917				32.3918
33.7185						31.4823				47.9075								58.3543		57.377		36.532		52.0767				49.2194				33.8381
34.5163						33.6999				44.2034								55.773		54.4391		35.0124		49.5151				48.2179				30.8922
34.0009						37.2616				52.273								55.3676		52.2152		38.8305		45.0215				49.1764				31.1453
32.8429						36.3957				47.7202								58.1647		55.7018		37.0198		48.0505				48.1067				33.9424
34.622						36.9093				44.0076								50.9068		53.2005		38.2309		48.4571				50.7242				31.7319
33.4873						36.4904				50.2102								54.9426		50.9339		35.4613		53.6936				50.3063				33.8696
32.542						34.0973				44.9524								51.9422		57.4963		38.0465		47.2249				49.3256				31.3951
33.1791						39.0685				48.5419								51.2931		55.7366		36.9465		52.8524				49.0504				32.287
30.2612						37.1382				53.9566								51.1536		63.0881		38.9309		51.5052				50.6441				32.7692
33.5022						32.6761				55.9415								59.0693		55.8075		39.6274		53.7283				50.6841				30.9516
30.9089						33.342				52.3627								53.1323		59.4452		35.2347		52.231				49.256				32.6095
31.1946						32.1868				53.0733								58.8849		59.7714		36.0866		49.7365				49.7238				31.1286
33.2028						37.5212				53.5328								48.8606		62.9708		38.8865		55.0109				48.7969				31.3589
31.4917						39.9626				48.9748								54.1964		52.4126		36.7346		52.0495				49.5107				30.4737
32.6414						39.2948				44.7944								55.0952		55.4721		36.2483		51.7796				48.4938				30.6689
33.3894						30.2354				48.1324								51.3563		52.1006		35.6658		50.1052				49.3726				34.2004
32.9963						39.985				48.1477								48.9741		57.2787		35.6938		52.3428				49.4593				34.7802
34.0947						35.5265				57.5711								55.83		64.2379		35.0724		55.3547				49.5716				34.7616
31.4898						31.4243				49.949								51.3785		53.0656		36.6516		52.6345				49.9406				31.0374
30.3131						35.4945				49.5513								53.2123		63.4831		38.4398		54.1888				48.1214				34.6327
31.0026						35.5764				52.5722								53.447		58.1717		38.6444		52.5879				48.368				32.5733
32.7815						38.2894				44.5267								49.3689		53.522		36.6572		55.0309				48.4262				33.2543
34.8525						36.4844				53.321								49.2455		63.7535		39.4821		54.0699				48.049				32.5477
34.4956						35.0403				53.0874								48.2332		54.4893		35.832		47.5645				48.672				30.5355
30.1942						31.3712				58.0412								49.8268		56.9904		35.0598		46.4113				50.0903				30.4918
32.4013						32.3784				46.7195								49.4403		58.3055		35.818		48.7953				48.1593				34.4945
32.8602						39.7177				57.7894								48.3268		51.6687		38.9034		55.9089				48.6458				31.4833
34.6017						35.1773				47.1855								49.9935		53.5438		38.8205		51.3222				49.417				32.5994
34.7256						32.5808				54.3808								52.313		53.2919		35.0839		50.7632				50.655				33.6852
32.5798						32.4781				49.6798								49.4268		64.4129		39.4554		50.3996				48.7981				34.6618
30.7639						38.8662				55.5156								51.7324		57.4963		39.6469		53.6581				48.6222				34.557
30.142						38.512				48.94								54.9739		58.7418		35.07		48.889				50.2651				30.1007
33.9339						30.1416				56.5738								48.1707		59.223		37.0547		55.9427				48.8768				30.3435
33.2721						31.9793				53.0961								50.856		63.5534		35.0389		55.4837				49.8901				32.2766
33.4115						30.6902				45.2797								57.7652		60.4683		39.6919		45.7537				48.4285				33.0573
30.0453						39.6652				46.389								58.6245		53.3189		37.7801		49.7624				48.366				32.7211
32.2519						38.5996				56.6842								48.8696		50.5015		38.8009		47.7171				49.49				33.9087
32.77						38.4627				55.449								54.117		50.1579		37.2394		54.1393				50.7096				31.8523
31.0571						37.284				52.1044								54.4757		58.3232		36.0454		47.571				49.8799				30.6507
30.2429						39.117				43.831								49.3041		58.1638		36.2517		51.0333				50.45				32.0669
30.8094						39.9812				57.7539								48.3895		54.4812		38.0825		49.0392				48.3303				34.4383
32.3187						30.7471				55.595								56.42		55.2896		35.085		50.9768				50.2378				33.4946
32.7081						31.8399				48.3476								48.9619		58.661		36.6614		45.7754				49.7514				34.2962
32.6382						31.6626				54.5316								53.0856		64.0845		39.464		53.1278				49.0781				33.994
30.7726						35.5163				48.246								57.8898		58.9646		35.873		48.8667				50.1285				34.3344
31.3286						36.6544				47.5524								53.3869		59.8209		38.3886		47.4295				49.325				32.9484
32.8229						30.1044				42.1003								47.9284		57.4859		35.4598		53.6358				50.868				33.7872
33.2061						33.9714				51.6263								49.969		64.2295		37.6336		53.9886				50.6093				34.8217
34.4973						33.9423				45.7393								53.8273		57.5867		37.0321		48.2712				50.58				30.3669
33.5354						30.0709				58.2343								55.896		58.0345		38.6442		46.1821				50.405				32.5999
33.99						38.6764				52.0528								57.7565		56.2576		37.9375		54.5413				50.1498				32.2959
30.4735						38.4567				45.6343								53.0302		57.8036		39.8504		45.1705				49.6416				31.5463
33.9383						39.2349				52.0169								58.2063		57.5198		36.6215		51.1912				50.2571				32.4104
30.192						35.7953				58.6121								58.7317		53.221		38.6711		47.9599				48.7256				33.6742
32.9208						33.2209				55.5786								56.295		60.1892		35.2336		51.8427				50.4064				33.3374
32.0689						36.6632				49.8513								47.8917		63.6433		39.6365		47.8358				49.7274				34.9628
32.4054						30.169				48.5902								50.0231		62.4186		37.6226		55.2508				49.3674				31.5754
30.7923						37.531				45.6433								50.7778		53.8774		37.5272		53.5984				48.8396				33.2607
30.9237						33.7492				54.7737								52.5395		64.8291		38.638		45.5541				48.5862				30.1787
33.9433						39.7442				55.8848								54.2569		62.2375		35.0353		47.4991				50.7055				34.0497
34.0435						32.9967				53.4579								50.8191		58.1025		38.2702		45.4737				48.6383				34.6219
30.144						39.9139				47.3878								48.4804		60.6454		36.0264		54.1471				48.4582				30.4322
34.1805						37.0012				49.9136								53.5325		58.1581		38.026		55.5378				50.1216				33.9547
34.5495						39.1736				48.7314								52.0952		53.9961		39.2576		51.0145				49.54				34.2213
32.8645						35.2921				56.0812								49.3158		58.5759		37.1708		55.1033				48.9096				31.4234
34.1295						31.1964				56.5273								50.0847		57.2477		36.4268		50.0968				49.0437				30.0873
33.1848						30.5699				52.6634								55.9192		57.0362		39.1789		50.4242				49.1623				30.9058
31.8481						37.1614				55.3236								53.067		63.981		37.5687		48.9052				49.1125				32.8178
32.3112						38.7678				53.0396								53.8222		61.97		36.3855		51.9511				48.4227				30.5195
30.3182						33.8931				52.3224								53.0482		53.0447		39.736		52.4838				49.4939				31.7186
34.4346						39.3453				54.9961								58.2683		54.0467		39.9394		49.5565				48.9695				34.6529
34.5043						34.6099				49.1838								53.0891		63.0199		39.1642		51.1721				50.9669				31.683
32.2743						32.3723				43.781								51.2281		60.3071		35.328		45.238				48.5921				31.2087
33.3527						34.4168				45.1388								55.4654		57.4482		37.7368		48.9114				49.061				32.4468
32.7203						39.5641				49.0463								55.6869		53.2227		38.0474		45.4185				49.2028				32.5491
31.2069						36.2289				58.636								58.8582		58.3384		38.3079		50.4109				48.849				33.1702
34.5498						33.5367				48.0779								51.4901		58.0803		37.6856		55.7322				49.889				31.8764
32.3377						32.6629				56.7542								53.309		61.1033		36.8494		48.1372				50.3888				30.7749
33.9285						35.9367				56.8139								58.6696		56.2443		36.2182		47.5287				49.0865				32.1697
34.7895						33.8165				42.7748								56.0379		54.8325		38.9925		53.8203				50.7814				33.5827
33.529						33.3392				50.9118								55.7855		53.353		37.0632		55.4242				48.6393				30.3894
33.5934						30.9924				50.5373								56.8448		51.4868		39.0844		46.8903				48.242				30.4654
33.3393						32.7843				48.7702								55.7716		54.0304		39.1418		45.5024				50.7461				31.9687
34.5228						32.8928				53.507								56.4187		54.2625		36.8068		54.7794				49.7838				33.6187
31.512						39.6439				43.3078								57.5472		56.5251		37.7548		51.6149				47.8178				30.3146
34.0556						38.0064				57.2213								52.887		54.651		36.1673		50.7429				49.8194				31.468
33.4637						35.9945				48.6918								49.8692		57.5593		38.0301		49.7489				50.4441				33.6948
33.5516						34.3213				58.0263								58.6365		57.7322		38.4363		48.1348				50.3837				31.4197
31.5002						30.2673				48.5497								50.8661		55.1089		36.5283		55.655				47.8791				31.0447
30.4388						34.8702				44.7368								55.3326		54.6505		37.3508		49.6157				48.4574				30.4143
34.2019						33.9221				56.4319								54.4715		64.0112		39.9991		48.7426				50.8816				33.9016
31.3192						35.1197				47.608								49.7378		53.9573		36.7438		47.002				47.9524				33.8356
30.4588						32.0378				53.5498								53.9638		59.7148		37.9985		45.2487				49.8121				30.7071
33.1804						32.4754				47.8173								50.085		62.1897		37.9459		52.3752				47.8754				32.8643
32.5274						39.4303				53.9775								55.1032		55.6623		39.0078		53.6676				48.223				31.6565
30.3654						39.438				52.7723								58.2216		59.0926		36.172		47.2143				48.4011				33.4067
31.5887						38.2841				45.2495								52.9218		53.8845		39.9365		48.5678				50.2777				30.9324
32.9109						34.15				57.9989								58.8506		56.7964		35.289		54.8543				48.5619				33.3654
34.2697						30.439				45.2782								48.8703		50.6385		39.0051		45.6468				50.063				31.233
30.3957						30.4652				53.8507								49.2424		54.4316		39.0613		53.9746				50.1123				33.3715
31.8078						35.4452				55.5532								52.6073		62.6538		36.0536		53.7753				49.3185				33.3805
32.6511						32.4133				44.6234								51.2806		58.4042		37.9125		53.9831				48.3403				31.6314
34.0842						37.6274				43.803								50.2722		56.0304		38.6351		50.8192				48.5889				34.8216
34.7247						38.6275				42.2081								58.8301		51.6391		38.8413		53.027				47.8763				31.6622
30.6233						36.0518				53.7637								56.179		50.7099		37.5651		47.0627				50.4755				34.8548
34.5675						31.989				46.1048								52.7783		61.6436		39.7252		55.3356				50.0742				30.9886
31.8933						30.0105				47.1382								52.9842		53.5172		38.0841		55.2896				47.9902				31.024
31.5361						30.922				58.9486								58.8346		60.1618		36.2625		51.1764				49.0425				31.5937
30.968						30.2175				49.1172								53.295		60.8764		39.5436		49.7873				50.2319				31.5203
31.6511						37.1977				47.153								54.9974		53.5429		36.7988		45.3947				49.393				34.0827
32.4606						38.4009				43.0518								48.955		64.4715		38.1987		49.5441				50.5503				30.4337
33.673						30.4329				57.9865								51.2527		52.1834		35.7976		52.9195				48.5661				32.3123
31.7115						35.1015				46.0056								52.2932		55.2875		36.505		46.2397				50.4717				30.2342
30.5702						34.2514				56.0538								51.2789		53.511		37.4944		47.137				48.1999				32.2483
31.4327						34.9426				46.7942								53.7733		56.1065		39.6858		47.8109				49.2389				31.7159
34.2529						34.7135				49.9832								56.403		55.0388		39.0562		51.0072				48.4725				30.8196
31.211						31.7247				48.7631								48.8536		62.7933		38.0254		49.7433				49.7996				34.5714
30.1421						39.9201				56.9662								52.7743		55.3581		39.6266		55.8055				50.4057				30.8531
31.6097						34.1581				54.7267								54.4119		64.6661		38.6133		50.9369				50.361				32.7455
34.3471						35.8118				49.1863								52.2958		53.0877		35.0646		52.7153				50.2629				31.8197
30.9485						32.3797				43.6055								59.1526		52.393		37.2418		49.843				50.7972				31.1735
34.0937						37.0879				53.5378								53.5631		54.8069		39.0861		54.8702				49.9194				30.168
30.3531						30.5519				50.7112								51.5816		55.7838		35.2543		50.0095				48.3715				31.1576
33.6691						33.8682				47.3024								54.0748		56.9352		35.3495		53.2823				48.8619				30.2029
31.1039						34.3477				51.6142								54.8182		62.7264		35.3962		55.6623				49.5451				31.7888
33.1612						30.8127				53.0144								58.2507		64.1094		39.292		45.9439				50.8793				33.6357
31.8648						36.9836				55.8121								55.1723		58.4135		36.611		52.7843				48.8885				33.6738
33.061						30.687				53.505								48.805		53.2073		39.7194		45.9917				48.0095				34.2892
34.7296						36.9936				44.7494								53.1002		53.2397		39.6877		47.1682				48.0743				34.9999
30.77						33.6533				52.6069								48.0369		53.7192		38.3105		54.3106				48.0017				31.9994
32.9389						30.9922				51.8317								55.5909		60.3456		39.4568		46.2934				50.9752				30.9159
31.0821						37.0895				42.0255								54.9296		50.2323		35.642		53.5662				50.2186				30.5351
30.5203						39.4585				48.8183								50.2424		60.7121		35.7024		50.7211				49.1838				31.8402
32.1838						39.639				52.8579								48.7841		62.2989		39.3395		53.2186				50.6112				32.1509
30.0507						32.7529				56.9475								51.6567		63.4129		36.4117		46.9551				49.6733				30.8938
34.6682						35.5397				49.8976								53.0498		55.9702		36.3121		53.6442				49.2857				34.9151
32.758						36.445				51.738								49.6764		56.6342		36.1695		47.0369				50.2751				32.9297
32.0426						33.7002				55.6118								58.0727		62.2968		39.51		48.6502				50.8722				33.8247
33.6465						36.3922				49.9038								49.4226		64.9656		37.3367		52.8827				49.885				30.2241
30.733						33.2225				43.7594								58.9228		57.692		36.7533		48.9876				50.2146				33.5049
34.4078						36.819				45.3238								53.9443		55.8205		37.9818		52.8272				48.7926				32.19
31.3234						36.4692				46.3524								56.7963		54.549		39.9458		45.4127				49.6496				30.5217
34.4654						36.1738				56.5073								57.3878		55.9551		35.5908		55.1512				49.0254				32.4233
33.9923						37.7022				54.1641								54.907		60.8755		39.9395		53.8848				50.0929				34.014
34.5453						39.7502				46.4473								56.8727		64.5091		37.6412		54.362				48.526				30.0657
31.5446						36.4411				47.3334								53.6349		55.7949		38.5761		54.4464				48.3678				32.8551
32.7293						39.8576				47.3322								48.6012		56.3772		35.9745		53.6882				50.5599				33.2281
32.2582						38.8081				42.713								53.568		54.9452		37.3281		50.2259				48.7882				34.1008
33.3822						31.2946				45.4215								48.0746		64.1766		37.5414		50.4968				50.2193				32.2494
30.3387						36.1502				49.5738								52.7561		51.196		36.2778		50.4558				47.9178				31.4625
30.6483						37.5711				52.7375								58.8862		52.717		38.3335		49.0109				50.8551				33.6756
31.6787						30.0247				52.8472								58.0076		53.4753		39.8091		54.7787				48.3463				33.9083
32.5373						34.9812				48.7222								54.0563		55.3769		39.0521		45.9877				49.1401				31.4702
33.2439						30.9172				51.2379								51.2496		50.9473		36.1887		55.911				48.9662				32.316

## Sheet: Qilian Shan
	Exhumation ages (Ma)		Final Age(Ma)	1σ		Methods	Age Model	Reference
He et al., 2017	50	60	54.9449	2.87715		AFT	N.A.	He, P., Song, C., Wang, Y., Chen, L., Chang, P., Wang, Q., and Ren, B., 2017, Cenozoic exhumation in the Qilian Shan, northeastern Tibetan Plateau: Evidence from detrital fission track thermochronology in the Jiuquan Basin: Journal of Geophysical Research: Solid Earth, v. 122, no. 8, p. 6910-6927.
He et al., 2017	45		45	1		AFT	N.A.	He, P., Song, C., Wang, Y., Chen, L., Chang, P., Wang, Q., and Ren, B., 2017, Cenozoic exhumation in the Qilian Shan, northeastern Tibetan Plateau: Evidence from detrital fission track thermochronology in the Jiuquan Basin: Journal of Geophysical Research: Solid Earth, v. 122, no. 8, p. 6910-6927.
Jolivet et al., 2001	40	10	40	10		AFT	N.A.	Jolivet, M., Brunel, M., Seward, D., Xu, Z., Yang, J., Roger, F., Tapponnier, P., Malavieille, J., Arnaud, N., and Wu, C., 2001, Mesozoic and Cenozoic tectonics of the northern edge of the Tibetan plateau: fission-track constraints: Tectonophysics, v. 343, no. 1-2, p. 111-134.
Jolivet et al., 2001	40	10	40	10		AFT	N.A.	Jolivet, M., Brunel, M., Seward, D., Xu, Z., Yang, J., Roger, F., Tapponnier, P., Malavieille, J., Arnaud, N., and Wu, C., 2001, Mesozoic and Cenozoic tectonics of the northern edge of the Tibetan plateau: fission-track constraints: Tectonophysics, v. 343, no. 1-2, p. 111-134.
Jolivet et al., 2001	40	10	40	10		AFT	N.A.	Jolivet, M., Brunel, M., Seward, D., Xu, Z., Yang, J., Roger, F., Tapponnier, P., Malavieille, J., Arnaud, N., and Wu, C., 2001, Mesozoic and Cenozoic tectonics of the northern edge of the Tibetan plateau: fission-track constraints: Tectonophysics, v. 343, no. 1-2, p. 111-134.
Jolivet et al., 2001	40	10	40	10		AFT	N.A.	Jolivet, M., Brunel, M., Seward, D., Xu, Z., Yang, J., Roger, F., Tapponnier, P., Malavieille, J., Arnaud, N., and Wu, C., 2001, Mesozoic and Cenozoic tectonics of the northern edge of the Tibetan plateau: fission-track constraints: Tectonophysics, v. 343, no. 1-2, p. 111-134.
Jolivet et al., 2001	40	10	40	10		AFT	N.A.	Jolivet, M., Brunel, M., Seward, D., Xu, Z., Yang, J., Roger, F., Tapponnier, P., Malavieille, J., Arnaud, N., and Wu, C., 2001, Mesozoic and Cenozoic tectonics of the northern edge of the Tibetan plateau: fission-track constraints: Tectonophysics, v. 343, no. 1-2, p. 111-134.
Jolivet et al., 2001	40	10	40	10		AFT	N.A.	Jolivet, M., Brunel, M., Seward, D., Xu, Z., Yang, J., Roger, F., Tapponnier, P., Malavieille, J., Arnaud, N., and Wu, C., 2001, Mesozoic and Cenozoic tectonics of the northern edge of the Tibetan plateau: fission-track constraints: Tectonophysics, v. 343, no. 1-2, p. 111-134.
Jolivet et al., 2001	40	10	40	10		AFT	N.A.	Jolivet, M., Brunel, M., Seward, D., Xu, Z., Yang, J., Roger, F., Tapponnier, P., Malavieille, J., Arnaud, N., and Wu, C., 2001, Mesozoic and Cenozoic tectonics of the northern edge of the Tibetan plateau: fission-track constraints: Tectonophysics, v. 343, no. 1-2, p. 111-134.
Jolivet et al., 2001	40	10	40	10		AFT	N.A.	Jolivet, M., Brunel, M., Seward, D., Xu, Z., Yang, J., Roger, F., Tapponnier, P., Malavieille, J., Arnaud, N., and Wu, C., 2001, Mesozoic and Cenozoic tectonics of the northern edge of the Tibetan plateau: fission-track constraints: Tectonophysics, v. 343, no. 1-2, p. 111-134.
Jolivet et al., 2001	40	10	40	10		AFT	N.A.	Jolivet, M., Brunel, M., Seward, D., Xu, Z., Yang, J., Roger, F., Tapponnier, P., Malavieille, J., Arnaud, N., and Wu, C., 2001, Mesozoic and Cenozoic tectonics of the northern edge of the Tibetan plateau: fission-track constraints: Tectonophysics, v. 343, no. 1-2, p. 111-134.
Jolivet et al., 2001	40	10	40	10		AFT	N.A.	Jolivet, M., Brunel, M., Seward, D., Xu, Z., Yang, J., Roger, F., Tapponnier, P., Malavieille, J., Arnaud, N., and Wu, C., 2001, Mesozoic and Cenozoic tectonics of the northern edge of the Tibetan plateau: fission-track constraints: Tectonophysics, v. 343, no. 1-2, p. 111-134.
Jolivet et al., 2001	40	10	40	10		AFT	N.A.	Jolivet, M., Brunel, M., Seward, D., Xu, Z., Yang, J., Roger, F., Tapponnier, P., Malavieille, J., Arnaud, N., and Wu, C., 2001, Mesozoic and Cenozoic tectonics of the northern edge of the Tibetan plateau: fission-track constraints: Tectonophysics, v. 343, no. 1-2, p. 111-134.
Dai et al., 2005	40.2		40.2	1		Sed.	N.A.	Dai, S., Fang, X., Song, C., Gao, J., Gao, D., and Li, J., 2005, Early tectonic uplift of the northern Tibetan Plateau: CHINESE SCIENCE BULLETIN-ENGLISH EDITION-, v. 50, no. 15, p. 1642.
Dai et al., 2005	33.35		33.35	1		Sed.	N.A.	Dai, S., Fang, X., Song, C., Gao, J., Gao, D., and Li, J., 2005, Early tectonic uplift of the northern Tibetan Plateau: CHINESE SCIENCE BULLETIN-ENGLISH EDITION-, v. 50, no. 15, p. 1642.
Ma et al., 2016	31	33	31.9673	0.580842		Sed.	N.A.	Ma, L., Bao, J., Ying, H., Hu, C., Zhong, S., Yang, S., Song, C., Meng, Q. The response of sediment flux of Jiuxi Basin in the northern boundary of Qilian to the tectonic uplift and weathering-denudation history[J]. Acta Sedimentologica Sinica, 2016, 34(1): 49-57(in Chinese with English abstract).
Qi et al., 2016	30		30	1		AFT	N.A.	Qi, B., Hu, D., Yang, X., Zhang, Y., Tan, C., Zhang, P., and Feng, C., 2016, Apatite fission track evidence for the Cretaceous–Cenozoic cooling history of the Qilian Shan (NW China) and for stepwise northeastward growth of the northeastern Tibetan Plateau since early Eocene: Journal of Asian Earth Sciences, v. 124, p. 28-41.
Qi et al., 2016	40	60	50.104	5.98445		AFT	N.A.	Qi, B., Hu, D., Yang, X., Zhang, Y., Tan, C., Zhang, P., and Feng, C., 2016, Apatite fission track evidence for the Cretaceous–Cenozoic cooling history of the Qilian Shan (NW China) and for stepwise northeastward growth of the northeastern Tibetan Plateau since early Eocene: Journal of Asian Earth Sciences, v. 124, p. 28-41.
Wang, 1997	33		33	1		Sed.	N.A.	Wang, E., 1997, Displacement and timing along the northern strand of the Altyn Tagh fault zone, northern Tibet: Earth and Planetary Science Letters, v. 150, no. 1, p. 55-64.
Qi et al., 2013	33.4		33.4	1		ESR	N.A.	Qi, B., Hu, D., Wang, J., Wang, X., Zhang, X., Zhang, Y., Yang, X., Gao, X., 2013. ESR dating of the Palaeogene in Muli Basin in the middle of Qilian Mountains and its geological significance. J. Geom. 4, 392–402 (in Chinese with English abstract).
He et al., 2018	54	60	57.0201	1.73917		AFT	N.A.	He, P., Song, C., Wang, Y., Meng, Q., Chen, L., Yao, L., Huang, R., Feng, W., and Chen, S., 2018, Cenozoic deformation history of the Qilian Shan (northeastern Tibetan Plateau) constrained by detrital apatite fission-track thermochronology in the northeastern Qaidam Basin: Tectonophysics, v. 749, p. 1-11.
He et al., 2018	38	42	39.9619	1.16829		AFT	N.A.	He, P., Song, C., Wang, Y., Meng, Q., Chen, L., Yao, L., Huang, R., Feng, W., and Chen, S., 2018, Cenozoic deformation history of the Qilian Shan (northeastern Tibetan Plateau) constrained by detrital apatite fission-track thermochronology in the northeastern Qaidam Basin: Tectonophysics, v. 749, p. 1-11.
Cheng et al., 2016	45	55	49.9938	2.93186		AFT	N.A.	Cheng, X., Lin, X., Wu, L., Chen, H., Xiao, A., Gong, J., Zhang, F., and Yang, S., 2016, The exhumation history of north Qaidam thrust belt constrained by apatite fission track thermochronology: implication for the evolution of the Tibetan Plateau: Acta Geologica Sinica (English Edition), v. 90, no. 3, p. 870-883.
Wan et al., 2011	30	40	35.0029	2.86498		AFT	N.A.	Wan J L, Zheng D W, Zheng W J, et al. Modeling thermal history during low temperature by K-feldspar MDD and fission track: Example from Meso-Cenozoic tectonic evolution in Saishitengshan in the northern margin of Qaidam Basin[J]. Dizhen Dizhi(Seismology and Geology), 2011, 33(2): 369-382.
Wan et al., 2011	30	40	35.0029	2.86498		AFT	N.A.	Wan J L, Zheng D W, Zheng W J, et al. Modeling thermal history during low temperature by K-feldspar MDD and fission track: Example from Meso-Cenozoic tectonic evolution in Saishitengshan in the northern margin of Qaidam Basin[J]. Dizhen Dizhi(Seismology and Geology), 2011, 33(2): 369-382.
Wan et al., 2011	30	40	35.0029	2.86498		AFT	N.A.	Wan J L, Zheng D W, Zheng W J, et al. Modeling thermal history during low temperature by K-feldspar MDD and fission track: Example from Meso-Cenozoic tectonic evolution in Saishitengshan in the northern margin of Qaidam Basin[J]. Dizhen Dizhi(Seismology and Geology), 2011, 33(2): 369-382.
Wan et al., 2011	30	40	35.0029	2.86498		AFT	N.A.	Wan J L, Zheng D W, Zheng W J, et al. Modeling thermal history during low temperature by K-feldspar MDD and fission track: Example from Meso-Cenozoic tectonic evolution in Saishitengshan in the northern margin of Qaidam Basin[J]. Dizhen Dizhi(Seismology and Geology), 2011, 33(2): 369-382.
Qi et al., 2016	55		55	1		AFT	N.A.	Qi, B., Hu, D., Yang, X., Zhang, Y., Tan, C., Zhang, P., and Feng, C., 2016, Apatite fission track evidence for the Cretaceous–Cenozoic cooling history of the Qilian Shan (NW China) and for stepwise northeastward growth of the northeastern Tibetan Plateau since early Eocene: Journal of Asian Earth Sciences, v. 124, p. 28-41.
Wang et al., 2004	30	36	33.0699	1.71173		AFT	N.A.	Wang, F., Lob, C.-H., Li, Q., Yeh, M.-W., Wan, J., Zheng, D., and Wang, E., 2004, Onset timing of significant unroofing around Qaidam basin, northern Tibet, China: constraints from 40Ar/39Ar and FT thermochronology on granitoids: Journal of Asian Earth Sciences, v. 24, p. 59-69.
Bovet et al., 2009	23.03	33.9	28.4458	3.15281		Sed.	N.A.	Bovet, P. M., Ritts, B. D., Gehrels, G., Abbink, A. O., Darby, B., and Hourigan, J., 2009, Evidence of Miocene crustal shortening in the north Qilian Shan from Cenozoic stratigraphy of the western Hexi Corridor, Gansu Province, China: American Journal of Science, v. 309, no. 4, p. 290-329.
Lin et al., 2022	50		50	1		AFT	N.A.	Lin, Xu, et al. "The Formation of the North Qilian Shan through Time: Clues from Detrital Zircon Fission-Track Data from Modern River Sediments." Geosciences 12.4 (2022): 166.
Lin et al., 2021	42		42	1		AFT	N.A.	Lin, X., Jolivet, M., Liu-Zeng, J., Cheng, F., Tian, Y., and Li, C. a., 2021, Mesozoic-Cenozoic cooling history of the Eastern Qinghai Nan Shan (NW China): Apatite low-temperature thermochronology constraints: Palaeogeography, Palaeoclimatology, Palaeoecology, p. 110416.
Craddock et al., 2011	39	51	45.0872	3.48055		AFT	N.A.	Craddock, William, Eric Kirby, and Huiping Zhang. "Late Miocene–Pliocene range growth in the interior of the northeastern Tibetan Plateau." Lithosphere 3.6 (2011): 420-438.
He et al., 2021	50	60	55	2.90238		AFT	N.A.	He, P., Song, C., Wang, Y., Wang, D., Chen, L., Meng, Q., and Fang, X., 2021, Early Cenozoic activated deformation in the Qilian Shan, northeastern Tibetan Plateau: Insights from detrital apatite fission-track analysis: Basin Research, v. 33, no. 3, p. 1731-1748.
He et al., 2021	36	40	37.9123	1.15422		AFT	N.A.	He, P., Song, C., Wang, Y., Wang, D., Chen, L., Meng, Q., and Fang, X., 2021, Early Cenozoic activated deformation in the Qilian Shan, northeastern Tibetan Plateau: Insights from detrital apatite fission-track analysis: Basin Research, v. 33, no. 3, p. 1731-1748.
Chen et al., 2021	47.9	67.7	57.5159	5.88374		AFT	N.A.	Chen L, Song C, Wang Y, et al. Mesozoic–Cenozoic Uplift/Exhumation History of the Qilian Shan, NE Tibetan Plateau: Constraints From Low-Temperature Thermochronology[J]. Frontiers in Earth Science, 2021, 9: 760100.
Chen et al., 2021	27.7	39.2	33.4623	3.29689		AFT	N.A.	Chen L, Song C, Wang Y, et al. Mesozoic–Cenozoic Uplift/Exhumation History of the Qilian Shan, NE Tibetan Plateau: Constraints From Low-Temperature Thermochronology[J]. Frontiers in Earth Science, 2021, 9: 760100.
Feng et al., 2022	40	65	51.9325	7.26894		Sed.	N.A.	Feng, Z., Zhang, W., Fang, X., Zan, J., Zhang, T., Song, C., and Yan, M., 2022, Eocene deformation of the NE Tibetan Plateau: Indications from magnetostratigraphic constraints on the oldest sedimentary sequence in the Linxia Basin: Gondwana Research, v. 101, p. 77-93.
Peng et al., 2022	20	40	30.0274	5.79449		AFT	N.A.	Peng H, Wang J, Liu C, et al. Meso-Cenozoic growth of the eastern Qilian Shan, northeastern Tibetan Plateau margin: Insight from borehole apatite fission-track thermochronology in the Xiji Basin[J]. Marine and Petroleum Geology, 2022, 143: 105798.
Li et al., 2020	50		50	1		AFT	N.A.	Li, B., Zuza, A. V., Chen, X., Hu, D., Shao, Z., Qi, B., Wang, Z.-z., Levy, D. A., and Xiong, X., 2020, Cenozoic multi-phase deformation in the Qilian Shan and out-of-sequence development of the northern Tibetan Plateau: Tectonophysics, v. 782-783, p. 228423.
Li et al., 2020	25	30	27.4215	1.45002		AFT	N.A.	Li, B., Zuza, A. V., Chen, X., Hu, D., Shao, Z., Qi, B., Wang, Z.-z., Levy, D. A., and Xiong, X., 2020, Cenozoic multi-phase deformation in the Qilian Shan and out-of-sequence development of the northern Tibetan Plateau: Tectonophysics, v. 782-783, p. 228423.
Qi et al., 2016	25±7		25	7		AFT	N.A.	QI B, HU D, YANG X, et al. Apatite fission track study of the Cretaceous-Cenozoic stepwise uplift of the middle segment of the Qilian Mountain[J]. Acta Geoscientica Sinica, 2016 (1): 46-58.
He et al., 2022	50	65	53.6607	0		(U-Th)/He	N.A.	He, P., Song, C., Wang, Y., Zhao, Y., Tan, Y., Meng, Q., Zhang, Y., Chen, Y., and Zhang, J., 2022, Cenozoic two-phase topographic growth of the northeastern Tibetan Plateau derived from two thermochronologic transects across the southern Qilian Shan thrust belt: Tectonophysics, v. 837, p. 229432.
He et al., 2022	36	40	37.9228	1.14254		(U-Th)/He	N.A.	He, P., Song, C., Wang, Y., Zhao, Y., Tan, Y., Meng, Q., Zhang, Y., Chen, Y., and Zhang, J., 2022, Cenozoic two-phase topographic growth of the northeastern Tibetan Plateau derived from two thermochronologic transects across the southern Qilian Shan thrust belt: Tectonophysics, v. 837, p. 229432.
Pan et al., 2013	24±8		24	8		AFT	N.A.	Pan, B., Li, Q., Hu, X., Geng, H., Liu, Z., Jiang, S., and Yuan, W., 2013, Cretaceous and Cenozoic cooling history of the eastern Qilian Shan, north-eastern margin of the Tibetan Plateau: evidence from apatite fission-track analysis: Terra Nova, v. 25, no. 6, p. 431-438.
Wu et al., 2021	25	30	27.6233	1.45914		AFT	N.A.	Wu C, Zuza A V, Li J, et al. Late Mesozoic–Cenozoic cooling history of the northeastern Tibetan Plateau and its foreland derived from low-temperature thermochronology[J]. GSA Bulletin, 2021, 133(11-12): 2393-2417.
Jian et al., 2018	36	54	45.2433	5.14084		AFT	N.A.	Jian, X., Guan, P., Zhang, W., Liang, H., Feng, F., and Fu, L., 2018, Late Cretaceous to early Eocene deformation in the northern Tibetan Plateau: Detrital apatite fission track evidence from northern Qaidam basin: Gondwana Research, v. 60, p. 94-104.
He et al., 2019	50		50	1		Sed.	N.A.	He Z, Guo Z, Yang F, et al. Provenance of Cenozoic sediments in the Xining Basin revealed by Nd and Pb isotopic evidence: Implications for tectonic uplift of the NE Tibetan Plateau[J]. Geochemistry, Geophysics, Geosystems, 2019, 20(10): 4531-4544.
He et al., 2019	30	39	34.5132	2.54082		Sed.	N.A.	He Z, Guo Z, Yang F, et al. Provenance of Cenozoic sediments in the Xining Basin revealed by Nd and Pb isotopic evidence: Implications for tectonic uplift of the NE Tibetan Plateau[J]. Geochemistry, Geophysics, Geosystems, 2019, 20(10): 4531-4544.
An et al., 2020	35	40	37.5102	1.43706		AFT	N.A.	An K, Lin X, Wu L, et al. An immediate response to the Indian-Eurasian collision along the northeastern Tibetan Plateau: Evidence from apatite fission track analysis in the Kuantan Shan-Hei Shan[J]. Tectonophysics, 2020, 774: 228278.
Fang et al., 2019	54		54	1		Sed.	N.A.	Fang X, Fang Y, Zan J, et al. Cenozoic magnetostratigraphy of the Xining Basin, NE Tibetan Plateau, and its constraints on paleontological, sedimentological and tectonomorphological evolution[J]. Earth-Science Reviews, 2019, 190: 460-485.
Fang et al., 2019	30	34	31.9996	1.154		Sed.	N.A.	Fang X, Fang Y, Zan J, et al. Cenozoic magnetostratigraphy of the Xining Basin, NE Tibetan Plateau, and its constraints on paleontological, sedimentological and tectonomorphological evolution[J]. Earth-Science Reviews, 2019, 190: 460-485.
He et al., 2021	31	33.2	32.0894	0.633704		Sed.	N.A.	He C C, Zhang Y Q, Li S K, et al. Magnetostratigraphic study of a Late Cretaceous–Paleogene succession in the eastern Xining basin, NE Tibet: Constraint on the timing of major tectonic events in response to the India-Eurasia collision[J]. GSA Bulletin, 2021, 133(11-12): 2457-2484.
Dai et al., 2006	31	34.5	32.7078	0.991801		Sed.	N.A.	Dai S, Fang X, Dupont‐Nivet G, et al. Magnetostratigraphy of Cenozoic sediments from the Xining Basin: Tectonic implications for the northeastern Tibetan Plateau[J]. Journal of Geophysical Research: Solid Earth, 2006, 111(B11).
Wang et al., 2016	30		30	1		Sed.	N.A.	Wang W, Zhang P, Pang J, et al. The Cenozoic growth of the Qilian Shan in the northeastern Tibetan Plateau: A sedimentary archive from the Jiuxi Basin[J]. Journal of Geophysical Research: Solid Earth, 2016, 121(4): 2235-2257.
Wang et al., 2011	29	34	31.4719	1.47896		AFT	N.A.	Wang X, Zattin M, Li J, et al. Eocene to Pliocene exhumation history of the Tianshui-Huicheng region determined by Apatite fission track thermochronology: Implications for evolution of the northeastern Tibetan Plateau margin[J]. Journal of Asian Earth Sciences, 2011, 42(1-2): 97-110.
Wang et al., 2011	49.2±10.2		49.2	10.2		AFT	N.A.	Wang X, Zattin M, Li J, et al. Eocene to Pliocene exhumation history of the Tianshui-Huicheng region determined by Apatite fission track thermochronology: Implications for evolution of the northeastern Tibetan Plateau margin[J]. Journal of Asian Earth Sciences, 2011, 42(1-2): 97-110.
Wang et al., 2016	42	49	45.508	1.99343		AFT	N.A.	Wang X, Song C, Zattin M, et al. Cenozoic pulsed deformation history of northeastern Tibetan Plateau reconstructed from fission-track thermochronology[J]. Tectonophysics, 2016, 672: 212-227.
Wang et al., 2016	32	36	33.9856	1.16371		AFT	N.A.	Wang X, Song C, Zattin M, et al. Cenozoic pulsed deformation history of northeastern Tibetan Plateau reconstructed from fission-track thermochronology[J]. Tectonophysics, 2016, 672: 212-227.
Wang et al., 2017	47	52	49.507	1.42371		AFT	N.A.	Wang X, Deng L, Zattin M, et al. Palaeogene growth of the northeastern Tibetan Plateau: detrital fission track and sedimentary analysis of the Lanzhou basin, NW China[J]. Journal of Asian Earth Sciences, 2017, 147: 322-331.
Wang et al., 2017	32	40	35.9053	2.29068		AFT	N.A.	Wang X, Deng L, Zattin M, et al. Palaeogene growth of the northeastern Tibetan Plateau: detrital fission track and sedimentary analysis of the Lanzhou basin, NW China[J]. Journal of Asian Earth Sciences, 2017, 147: 322-331.
He et al., 2017	45	58	51.456	3.82528		AFT	N.A.	He P, Wang X, Song C, et al. Cenozoic evolution of the Western Qinling Mt. Range based on thermochronologic and sedimentary records from the Wudu Basin, NE Tibetan Plateau[J]. Journal of Asian Earth Sciences, 2017, 138: 484-494.
He et al., 2017	36	38	35.007	0.575357		AFT	N.A.	He P, Wang X, Song C, et al. Cenozoic evolution of the Western Qinling Mt. Range based on thermochronologic and sedimentary records from the Wudu Basin, NE Tibetan Plateau[J]. Journal of Asian Earth Sciences, 2017, 138: 484-494.
Wang et al., 2013	41	49	44.9359	2.26628		AFT	N.A.	Wang X, Zattin M, Li J, et al. Cenozoic tectonic uplift history of western qinling: evidence from sedimentary and fission-track data[J]. Journal of Earth Science, 2013, 24(4): 491-505.
Wang et al., 2013	27	34	30.3926	1.99052		AFT	N.A.	Wang X, Zattin M, Li J, et al. Cenozoic tectonic uplift history of western qinling: evidence from sedimentary and fission-track data[J]. Journal of Earth Science, 2013, 24(4): 491-505.
Bush et al., 2016	15.97	47.8	31.7934	9.21415		Sed.	Old	Bush, M. A., Saylor, J. E., Horton, B. K., and Nie, J., 2016, Growth of the Qaidam Basin during Cenozoic exhumation in the northern Tibetan Plateau: Inferences from depositional patterns and multiproxy detrital provenance signatures: Lithosphere, v. 8, no. 1, p. 58-82.
Yin et al., 2002	49		49	1		Sed.	Old	Yin, A., Rumelhart, P., Butler, R., Cowgill, E., Harrison, T., Foster, D., Ingersoll, R., Qing, Z., Xian-Qiang, Z., and Xiao-Feng, W., 2002, Tectonic history of the Altyn Tagh fault system in northern Tibet inferred from Cenozoic sedimentation: Geological Society of America Bulletin, v. 114, no. 10, p. 1257-1295.
Bush et al., 2016	52	56	54.0412	1.15009		Sed.	Old	Bush, M. A., Saylor, J. E., Horton, B. K., and Nie, J., 2016, Growth of the Qaidam Basin during Cenozoic exhumation in the northern Tibetan Plateau: Inferences from depositional patterns and multiproxy detrital provenance signatures: Lithosphere, v. 8, no. 1, p. 58-82.
Ji et al., 2017	46	52	49.0343	1.70085		Sed.	Old	Ji, J., Zhang, K., Clift, P. D., Zhuang, G., Song, B., Ke, X., and Xu, Y., 2017, High-resolution magnetostratigraphic study of the Paleogene-Neogene strata in the Northern Qaidam Basin: Implications for the growth of the Northeastern Tibetan Plateau: Gondwana Research, v. 46, p. 141-155.
Ji et al., 2017	33.2	38	35.5864	1.39582		Sed.	Old	Ji, J., Zhang, K., Clift, P. D., Zhuang, G., Song, B., Ke, X., and Xu, Y., 2017, High-resolution magnetostratigraphic study of the Paleogene-Neogene strata in the Northern Qaidam Basin: Implications for the growth of the Northeastern Tibetan Plateau: Gondwana Research, v. 46, p. 141-155.
Wei et al., 2013	50	60	54.8141	2.8311		Sed.	Old	Wei, Y., Zhang, K.X., Ji, J.L., Song, B.W., Jiang, S.S., Ke, X., 2013. Cenozoic sedimentation rate evolution of Qaidam Basin in the Tibetan Plateau and its response to the uplift of the plateau. Geol. Bull. China 32, 105–110 (in Chinese with English abstract).
Wei et al., 2013	34	45	39.3608	3.17884		Sed.	Old	Wei, Y., Zhang, K.X., Ji, J.L., Song, B.W., Jiang, S.S., Ke, X., 2013. Cenozoic sedimentation rate evolution of Qaidam Basin in the Tibetan Plateau and its response to the uplift of the plateau. Geol. Bull. China 32, 105–110 (in Chinese with English abstract).
Zhuang et al., 2011	34	56	45.1962	6.41989		Sed.	Old	Zhuang, G., Hourigan, J. K., Ritts, B. D., and Kent-Corson, M. L., 2011, Cenozoic multiple-phase tectonic evolution of the northern Tibetan Plateau: Constraints from sedimentary records from Qaidam basin, Hexi Corridor, and Subei basin, northwest China: American Journal of Science, v. 311, no. 2, p. 116-152.
Zhuang et al., 2011	34	56	45.1962	6.41989		Sed.	Old	Zhuang, G., Hourigan, J. K., Ritts, B. D., and Kent-Corson, M. L., 2011, Cenozoic multiple-phase tectonic evolution of the northern Tibetan Plateau: Constraints from sedimentary records from Qaidam basin, Hexi Corridor, and Subei basin, northwest China: American Journal of Science, v. 311, no. 2, p. 116-152.
Zhuang et al., 2011	34	56	45.1962	6.41989		Sed.	Old	Zhuang, G., Hourigan, J. K., Ritts, B. D., and Kent-Corson, M. L., 2011, Cenozoic multiple-phase tectonic evolution of the northern Tibetan Plateau: Constraints from sedimentary records from Qaidam basin, Hexi Corridor, and Subei basin, northwest China: American Journal of Science, v. 311, no. 2, p. 116-152.
Yu et al., 2017	33.9	41.2	37.6295	2.0658		Sed.	Old	Yu, X., Guo, Z., Zhang, Q., Cheng, X., Du, W., Wang, Z., and Bian, Q., 2017, Denan Depression controlled by northeast-directed Olongbulak Thrust Zone in northeastern Qaidam basin: Implications for growth of northern Tibetan Plateau: Tectonophysics, v. 717, p. 116-126.
Yin et al., 2008	50	65	57.4069	4.17349		Sed.	Old	Yin, A., Dang, Y. Q., Wang, L. C., Jiang, W. M., Zhou, S. P., Chen, X. H., Gehrels, G. E., and McRivette, M. W., 2008, Cenozoic tectonic evolution of Qaidam basin and its surrounding regions (Part 1): The southern Qilian Shan-Nan Shan thrust belt and northern Qaidam basin: Geological Society of America Bulletin, v. 120, no. 7-8, p. 813-846.
Yin et al., 2008	50	65	57.4069	4.17349		Sed.	Old	Yin, A., Dang, Y. Q., Wang, L. C., Jiang, W. M., Zhou, S. P., Chen, X. H., Gehrels, G. E., and McRivette, M. W., 2008, Cenozoic tectonic evolution of Qaidam basin and its surrounding regions (Part 1): The southern Qilian Shan-Nan Shan thrust belt and northern Qaidam basin: Geological Society of America Bulletin, v. 120, no. 7-8, p. 813-846.
Yin et al., 2008	50	65	57.4069	4.17349		Sed.	Old	Yin, A., Dang, Y. Q., Wang, L. C., Jiang, W. M., Zhou, S. P., Chen, X. H., Gehrels, G. E., and McRivette, M. W., 2008, Cenozoic tectonic evolution of Qaidam basin and its surrounding regions (Part 1): The southern Qilian Shan-Nan Shan thrust belt and northern Qaidam basin: Geological Society of America Bulletin, v. 120, no. 7-8, p. 813-846.
Yin et al., 2008	50	65	57.4069	4.17349		Sed.	Old	Yin, A., Dang, Y. Q., Wang, L. C., Jiang, W. M., Zhou, S. P., Chen, X. H., Gehrels, G. E., and McRivette, M. W., 2008, Cenozoic tectonic evolution of Qaidam basin and its surrounding regions (Part 1): The southern Qilian Shan-Nan Shan thrust belt and northern Qaidam basin: Geological Society of America Bulletin, v. 120, no. 7-8, p. 813-846.
Yin et al., 2008	50	65	57.4069	4.17349		Sed.	Old	Yin, A., Dang, Y. Q., Wang, L. C., Jiang, W. M., Zhou, S. P., Chen, X. H., Gehrels, G. E., and McRivette, M. W., 2008, Cenozoic tectonic evolution of Qaidam basin and its surrounding regions (Part 1): The southern Qilian Shan-Nan Shan thrust belt and northern Qaidam basin: Geological Society of America Bulletin, v. 120, no. 7-8, p. 813-846.
Yin et al., 2008	50	65	57.4069	4.17349		Sed.	Old	Yin, A., Dang, Y. Q., Wang, L. C., Jiang, W. M., Zhou, S. P., Chen, X. H., Gehrels, G. E., and McRivette, M. W., 2008, Cenozoic tectonic evolution of Qaidam basin and its surrounding regions (Part 1): The southern Qilian Shan-Nan Shan thrust belt and northern Qaidam basin: Geological Society of America Bulletin, v. 120, no. 7-8, p. 813-846.
Yin et al., 2008	50	65	57.4069	4.17349		Sed.	Old	Yin, A., Dang, Y. Q., Wang, L. C., Jiang, W. M., Zhou, S. P., Chen, X. H., Gehrels, G. E., and McRivette, M. W., 2008, Cenozoic tectonic evolution of Qaidam basin and its surrounding regions (Part 1): The southern Qilian Shan-Nan Shan thrust belt and northern Qaidam basin: Geological Society of America Bulletin, v. 120, no. 7-8, p. 813-846.
Yin et al., 2008	50	65	57.4069	4.17349		Sed.	Old	Yin, A., Dang, Y. Q., Wang, L. C., Jiang, W. M., Zhou, S. P., Chen, X. H., Gehrels, G. E., and McRivette, M. W., 2008, Cenozoic tectonic evolution of Qaidam basin and its surrounding regions (Part 1): The southern Qilian Shan-Nan Shan thrust belt and northern Qaidam basin: Geological Society of America Bulletin, v. 120, no. 7-8, p. 813-846.
Cheng et al., 2019	44.2	52	48.0619	2.24933		Sed.	Old	Cheng, F., Garzione, C. N., Mitra, G., Jolivet, M., Guo, Z., Lu, H., Li, X., Zhang, B., Zhang, C., Zhang, H., and Wang, L., 2019, The interplay between climate and tectonics during the upward and outward growth of the Qilian Shan orogenic wedge, northern Tibetan Plateau: Earth-Science Reviews, v. 198, p. 102945.
Cheng et al., 2019	44.2	52	48.0619	2.24933		Sed.	Old	Cheng, F., Garzione, C. N., Mitra, G., Jolivet, M., Guo, Z., Lu, H., Li, X., Zhang, B., Zhang, C., Zhang, H., and Wang, L., 2019, The interplay between climate and tectonics during the upward and outward growth of the Qilian Shan orogenic wedge, northern Tibetan Plateau: Earth-Science Reviews, v. 198, p. 102945.
Li et al., 2022	40		40	1		Sed.	Old	Li Z, Liu R, He J, et al. From ka to Ma: A multi-timescale record of accelerating Cenozoic tectonic uplift between the Qilian Shan and Qaidam Basin, northern Tibetan Plateau[J]. GSA Bulletin, 2022.
Yin et al., 2002	33		33	1		Sed.	Old	Yin, A., Rumelhart, P., Butler, R., Cowgill, E., Harrison, T., Foster, D., Ingersoll, R., Qing, Z., Xian-Qiang, Z., and Xiao-Feng, W., 2002, Tectonic history of the Altyn Tagh fault system in northern Tibet inferred from Cenozoic sedimentation: Geological Society of America Bulletin, v. 114, no. 10, p. 1257-1295.
Li et al., 2022	40		40	1		Sed.	Old	Li D, Jiang X, Gong W, et al. Tectonic uplift along the northeastern margin of the Qinghai–Tibetan Plateau: Constraints from the lithofacies sequence and deposition rate of the Qaidam Basin[J]. Tectonophysics, 2022, 827: 229279.
Li et al., 2022	40		40	1		Sed.	Old	Li D, Jiang X, Gong W, et al. Tectonic uplift along the northeastern margin of the Qinghai–Tibetan Plateau: Constraints from the lithofacies sequence and deposition rate of the Qaidam Basin[J]. Tectonophysics, 2022, 827: 229279.
Lu et al., 2018	50	65	42.1637	0.958569		Sed.	Old	Lu, H., Ye, J., Guo, L., Pan, J., Xiong, S., and Li, H., 2018, Towards a clarification of the provenance of Cenozoic sediments in the northern Qaidam Basin: Lithosphere, v. 11, no. 2, p. 252-272.
Jian et al., 2023	48	55	51.5254	2.02386		Sed.	Old	Jian X, Fu L, Wang P, et al. Sediment provenance of the Lulehe Formation in the Qaidam basin: Insight to initial Cenozoic deposition and deformation in northern Tibetan plateau[J]. Basin Research, 2023, 35(1): 271-294.
Jian et al., 2023	44	48	46.0051	1.14879		Sed.	Old	Jian X, Fu L, Wang P, et al. Sediment provenance of the Lulehe Formation in the Qaidam basin: Insight to initial Cenozoic deposition and deformation in northern Tibetan plateau[J]. Basin Research, 2023, 35(1): 271-294.
Song et al., 2019	46.5	50.4	48.4291	1.12035		Sed.	Old	Song B, Zhang K, Hou Y, et al. New insights into the provenance of Cenozoic strata in the Qaidam Basin, northern Tibet: Constraints from combined U-Pb dating of detrital zircons in recent and ancient fluvial sediments[J]. Palaeogeography, Palaeoclimatology, Palaeoecology, 2019, 533: 109254.
Zhuang et al., 2018	50	65	57.76	4.32116		Sed.	Old	Zhuang, G., Johnstone, S. A., Hourigan, J., Ritts, B., Robinson, A., and Sobel, E. R., 2018, Understanding the geologic evolution of Northern Tibetan Plateau with multiple thermochronometers: Gondwana Research, v. 58, p. 195-210.
Luo et al., 2022	40.5	43.8	42.1637	0.958569		Sed.	Old	Luo L, Geissman J W, Zeng X, et al. Geometry and kinematics of the western part of the NE Qaidam Basin: Implications for the growth of the Tibetan Plateau[J]. Tectonophysics, 2022, 822: 229154.
He et al., 2017		He et al., 2017		Jolivet et al., 2001		Dai et al., 2005		Dai et al., 2005		Bush et al., 2016		Ma et al., 2016		Qi et al., 2016		Qi et al., 2016		Wang, 1997		Qi et al., 2013		He et al., 2018		He et al., 2018		Cheng et al., 2016		Wan et al., 2011		Qi et al., 2016		Wang et al., 2004		Yin et al., 2002		Bovet et al., 2009		Bush et al., 2016		Ji et al., 2017		Ji et al., 2017		Wei et al., 2013		Wei et al., 2013		Zhuang et al., 2011
54.9449	2.87715	45	1	40	10	40.2	1	33.35	1	31.7934	9.21415	31.9673	0.580842	30	1	50.104	5.98445	33	1	33.4	1	57.0201	1.73917	39.9619	1.16829	49.9938	2.93186	35.0029	2.86498	55	1	33.0699	1.71173	49	1	28.4458	3.15281	54.0412	1.15009	49.0343	1.70085	35.5864	1.39582	54.8141	2.8311	39.3608	3.17884	45.1962	6.41989
54.4256										39.3692		31.257				51.7055						59.3747		41.9648		53.2747		33.9968				33.9147				24.8807		55.1978		49.9708		35.3087		57.5291		44.3007		46.4571
53.2596										46.9501		31.071				43.51						56.6726		38.64		49.1663		32.2293				30.8326				31.2476		54.5772		48.4884		37.3939		53.0183		35.1022		44.4578
57.2366										28.72		32.6023				46.0457						55.0724		40.5327		53.1461		36.3015				30.876				24.142		53.2155		48.2119		37.7886		55.4141		43.2459		36.4336
52.8319										36.5903		31.0545				54.9406						59.3408		38.4425		47.7187		32.079				33.5143				33.6778		52.9727		48.4153		34.8683		58.0822		40.6475		45.0375
55.5882										17.2811		31.3309				47.9542						55.001		41.7713		48.004		30.3744				34.1063				33.5602		55.4159		46.808		34.7764		57.5484		35.5075		34.6694
53.3894										19.6134		31.1497				48.6997						55.6583		40.7059		46.1538		30.427				32.2919				29.9295		52.6278		46.5147		37.379		59.6142		40.1308		46.215
54.0601										35.7784		31.4517				58.1129						58.5374		39.8604		51.7558		33.1325				33.2395				31.0821		52.463		46.0992		35.7393		50.1595		38.1045		37.1846
56.2849										37.9698		32.6572				45.7489						54.198		38.7116		50.9637		33.6366				31.0575				25.2954		52.3598		50.5553		33.3866		51.848		34.9663		34.0092
53.1857										25.1159		31.4566				58.2543						59.0482		38.3895		45.7783		30.2167				32.3558				23.8735		55.9591		51.5712		36.4525		54.4906		37.3849		40.3367
56.9588										40.7129		32.5542				57.5567						55.6332		39.7746		54.7222		32.4785				35.7773				31.6766		54.5994		48.5295		36.5354		52.7697		41.2363		43.2082
59.6871										36.5311		32.0929				55.3482						54.5749		40.0521		45.2874		31.4909				33.2795				31.7683		54.959		49.8134		35.386		53.6959		42.1354		48.4337
50.7058										33.4114		31.0492				47.5834						58.1139		40.8992		52.0968		36.2149				35.8455				25.6282		54.6115		48.8871		36.5467		58.2571		42.4102		49.1668
57.9604										39.8167		32.973				59.8748						57.5531		39.7908		52.4122		30.4575				33.4513				23.1991		52.8452		49.2846		37.605		52.51		44.9714		53.8377
50.2938										40.3265		32.5352				50.256						58.7105		38.472		45.7472		36.4512				32.9037				24.371		52.1582		48.1133		34.9289		50.0649		37.7624		36.6458
53.6433										43.1688		31.549				43.0809						58.1612		41.7102		48.3296		39.8507				34.996				30.7107		53.4559		49.985		37.0728		52.2928		41.691		52.4421
51.7706										45.1548		31.3536				46.0073						57.8781		39.2497		50.3824		31.4294				34.3379				26.5424		53.1302		49.8758		35.6683		50.9048		35.5693		51.4672
53.1463										47.7432		32.7792				51.1502						56.6309		41.6872		46.6812		33.4648				32.1536				25.1362		53.3869		49.787		36.9727		56.3489		43.1699		55.5776
54.4566										23.874		32.6078				48.2288						59.3126		39.3727		52.7382		38.5445				32.2966				26.501		55.3801		49.2586		35.6035		55.6222		42.2052		34.6187
51.1942										42.8508		31.4642				55.8692						57.9519		40.4898		53.312		34.8338				35.6769				30.8157		53.688		46.4736		36.1501		52.6486		43.5352		39.352
59.3535										16.4319		32.8114				53.0652						56.0087		39.4609		45.381		30.1479				33.2053				24.5267		52.1726		48.741		34.6504		55.7201		38.1545		36.2597
58.0121										40.4578		32.7759				45.495						57.3068		39.561		52.5161		38.5825				35.099				33.5033		52.1469		49.5892		34.1365		54.0208		34.0695		49.6349
53.8921										36.1731		31.5899				56.2024						57.6994		38.1325		49.0696		35.6297				35.5768				25.4577		54.3002		46.3709		33.859		58.8391		38.2179		49.4924
50.1726										41.8783		31.5719				45.096						57.4922		40.7927		50.012		34.8223				30.8281				25.8841		53.5869		47.9842		37.8203		52.8771		34.8539		53.0837
57.606										18.1855		31.5275				48.3567						56.4867		40.3829		52.8689		37.468				34.2772				27.4839		55.5376		47.1777		33.5899		56.3618		41.4531		41.2604
55.9839										40.8966		31.2837				41.8803						57.1673		38.4095		47.8384		30.1351				33.2039				32.4104		54.3223		50.4036		35.9625		57.8886		44.6334		34.0251
53.2442										27.4895		31.1145				58.9069						55.5162		38.9897		46.5209		32.1624				30.4659				25.2203		52.2101		48.1098		35.6154		59.5928		35.9474		48.045
56.1995										28.8244		31.1291				57.8829						54.1566		38.8437		46.6704		30.3371				32.2378				30.5474		55.6973		46.8668		34.0523		50.5156		42.4052		38.3277
54.5616										25.6678		31.7528				57.342						59.4259		40.4004		52.8536		33.3711				34.9222				33.0615		52.8146		49.1449		36.2108		59.0651		35.107		38.3223
58.9379										18.4496		31.1317				58.5145						56.4395		39.9739		54.9738		36.7981				35.314				23.6773		53.7833		46.1331		37.8867		58.7946		36.7801		39.8911
57.8677										21.9197		31.8434				47.5071						58.7739		39.8338		51.8271		31.3697				34.5509				32.967		54.832		49.0917		33.9338		54.6276		38.1954		42.0098
54.4851										29.9912		31.1823				50.4276						59.2624		38.5912		53.3404		31.7842				32.0443				31.8249		53.3693		50.3098		34.6049		52.968		44.3601		54.5333
59.309										44.665		32.7199				49.1259						55.8627		39.2356		45.2194		33.9486				32.4775				23.3411		55.9002		51.9379		33.5482		56.4809		35.6158		51.4136
58.2482										24.2464		32.6634				42.8946						56.895		38.3935		51.0491		37.4163				31.6823				33.8732		54.1206		46.3656		36.9404		50.7027		41.6136		43.9439
56.1641										38.3467		31.1039				42.3738						57.8518		38.1295		53.9866		37.4525				31.5119				25.3405		55.4093		51.3721		34.7597		51.0066		42.5242		37.7961
54.6426										44.706		32.2089				47.2248						54.7509		40.4671		45.4789		30.9504				30.1065				30.4433		53.7578		51.2005		36.3849		59.5871		34.9883		49.9061
55.1377										43.7409		31.7193				58.1858						56.7527		40.0102		53.5243		30.2089				33.7248				30.4273		54.505		50.6508		36.402		59.3581		38.8988		47.1118
55.999										35.8877		31.9488				51.4452						56.1375		38.2637		45.7667		34.1364				31.0336				27.9712		54.3197		51.3721		34.3181		58.8871		41.0792		50.2568
58.4837										16.7664		31.245				56.0757						54.9809		38.0618		46.4213		31.7329				31.0547				33.5324		53.0303		46.1315		33.9167		57.8573		43.3981		38.7867
57.7004										35.0808		31.9176				44.5033						54.329		40.8173		45.7779		32.4109				35.7157				23.4887		54.4961		48.9702		36.5532		56.9897		40.0638		54.7415
51.8064										42.1574		31.829				55.1111						54.804		39.3543		46.207		36.8938				34.0958				25.7428		54.9921		47.4779		33.4503		56.7937		36.3503		55.1431
54.8763										21.9179		31.1127				42.9219						56.1741		40.1453		48.5222		39.2087				33.4151				32.0352		54.5334		48.8209		34.2766		55.1972		37.4151		40.479
54.66										33.0349		32.2936				55.1873						54.0029		39.0877		53.251		30.6405				32.1955				29.49		54.5386		49.2645		34.1157		58.6468		34.1272		45.0354
55.6661										31.4828		32.8442				40.5661						58.2711		39.8445		45.0268		39.3933				31.0318				23.87		52.7716		50.0679		36.4974		50.599		36.5051		43.9565
58.4929										34.7577		32.4723				41.1039						56.6571		41.0728		50.0967		36.3578				34.495				30.1055		55.7028		46.218		35.6912		57.9525		37.8658		47.8494
50.079										23.6225		32.3602				41.7294						55.7621		40.3812		51.8662		33.3878				30.3409				24.4387		53.5913		46.3933		37.5226		54.5895		34.2111		45.7612
54.5664										29.9347		31.9485				57.58						57.8951		41.5996		50.5695		34.3866				35.196				27.9445		55.2303		47.2667		35.0483		53.1981		38.6143		46.2395
58.4085										28.3438		31.1396				43.9239						54.6066		39.4551		46.4372		37.1904				33.7769				32.2914		52.0704		50.6309		37.906		57.1594		38.9977		39.259
57.5995										19.4403		31.5001				49.7432						57.1642		40.4038		45.0923		37.5572				35.2446				23.1279		52.4724		49.8113		35.1942		58.8113		43.711		50.2212
52.6558										32.5401		32.5423				49.1685						56.2716		41.8493		52.7816		36.7144				33.7305				24.8932		55.0011		50.055		36.6264		56.152		41.8013		47.8157
50.1057										28.7826		32.0538				49.5581						57.154		38.1868		47.3159		30.824				33.3194				28.9661		52.8363		50.1403		34.6737		52.6681		36.8424		40.6414
58.3794										24.0042		32.5392				52.6084						58.6086		41.3716		45.0809		34.2117				32.5258				30.0539		52.4092		49.3705		36.0617		53.0204		40.2659		55.0137
51.9175										42.0847		31.4829				56.8825						59.8333		41.0006		45.3897		32.102				35.002				23.168		54.2302		49.4834		35.2425		52.213		34.6547		52.3878
51.0512										40.725		31.31				47.8625						58.544		38.6028		50.0553		31.3034				31.7392				25.1248		55.7432		51.6892		37.3774		50.6797		38.7042		40.1108
52.5499										35.2083		32.5782				57.499						55.5911		39.5456		54.9979		36.9334				31.4233				32.0941		55.0671		47.0824		35.1175		50.238		43.7871		43.4358
57.9414										45.0388		32.1092				55.9061						57.0872		40.8959		54.0512		35.5282				33.8852				29.6745		52.1616		47.8965		36.1954		59.5932		40.2114		40.1283
59.2656										40.6497		31.3728				43.825						57.8734		41.6888		53.4421		38.7881				35.3073				24.5183		55.6307		47.9034		33.3337		55.0262		37.406		38.8307
54.2663										41.6263		32.1566				49.1376						57.0671		38.2385		53.7775		37.0936				34.7471				29.4785		52.9354		50.5258		36.6071		51.1877		40.6831		35.5622
58.4067										21.5066		32.2676				58.944						55.2026		39.4272		48.1783		39.3913				34.2899				28.652		52.1853		49.0051		34.2839		53.8693		43.0179		34.3218
58.2383										32.8763		32.322				44.7007						54.2441		38.9776		50.9829		34.9043				30.3627				32.4011		52.6919		46.1665		35.8834		57.4366		41.5743		55.3505
52.0316										39.3449		32.3406				47.7597						56.1728		38.9467		48.4121		30.7813				34.4651				30.4851		52.9421		51.8071		37.4556		57.947		37.4226		37.3836
58.543										36.2121		32.6398				40.7337						58.8541		38.1637		54.9084		38.7264				34.6882				28.9247		54.8611		50.7855		34.8491		51.9155		40.8308		45.9838
57.4842										45.9047		32.6444				51.2955						54.5692		38.6937		51.4976		30.9377				31.6936				24.2947		53.2779		48.9738		37.7114		53.3852		39.7673		55.7231
50.2826										33.6144		31.8126				40.6054						58.119		41.9874		49.6483		37.5914				33.6288				31.0969		55.9396		50.5552		37.1631		58.2433		38.5092		39.7662
58.5601										20.513		31.7271				42.6599						58.3618		38.6463		51.8896		38.6825				33.0728				25.0541		52.69		47.3571		36.5222		50.0712		42.6865		53.5019
54.5893										19.4619		31.1103				59.4351						55.956		40.0509		48.8942		39.4686				33.5492				25.2929		54.4075		46.935		35.052		54.8354		37.3374		41.1343
56.7321										31.858		32.8949				48.3632						58.208		39.0245		51.6141		35.9				31.5569				24.754		52.5541		51.1665		36.3097		59.9495		38.9308		55.5311
53.3813										28.9588		31.4135				40.8483						54.1026		40.7215		49.7125		30.2277				32.8143				26.0721		53.4148		47.084		37.6619		52.6236		36.046		40.4852
57.0095										19.0839		31.4572				56.9269						55.3515		38.5193		50.1387		36.7405				33.401				33.6542		54.6507		48.618		35.9524		54.1485		44.8342		49.3713
52.994										20.2702		32.1452				42.5986						57.8185		38.507		45.395		38.0453				34.6948				25.8528		54.1927		49.2705		36.9598		51.2614		41.8692		43.6317
58.0324										39.6178		31.8717				56.685						57.2673		38.1218		49.9856		33.7401				31.1322				26.9807		55.7617		49.7156		35.3533		51.5602		35.0438		44.0987
52.8104										43.2096		31.4092				41.0525						56.7936		41.6383		53.2594		35.9888				33.9211				30.9817		53.347		47.7517		36.1379		56.2462		44.1831		43.4878
50.1416										16.2051		31.9128				52.3237						57.9596		39.0991		54.2037		39.3986				30.0973				25.4462		54.9877		47.0518		34.2042		59.6334		34.9058		53.6119
55.3664										25.9307		32.963				42.4336						59.9628		38.0025		47.1354		35.4017				32.4793				25.1885		54.1315		50.4269		34.3943		50.547		44.7528		53.439
54.5378										39.2707		32.5322				43.0974						54.597		38.4997		47.6441		32.898				35.7991				24.9649		54.849		47.186		34.5433		54.4231		41.9194		50.4644
51.8403										41.4236		31.6149				54.6344						54.4049		38.2688		48.7106		36.8628				33.8494				25.8059		55.8505		47.7927		34.1282		56.9533		39.3885		55.7717
56.6998										37.6428		31.0592				44.7131						56.1672		38.1438		51.1554		35.9873				34.0961				26.094		54.325		48.4385		35.7208		55.2285		35.057		44.5418
59.6927										19.0733		31.6113				45.5652						58.9543		41.8005		52.0419		37.481				30.453				28.0638		54.2004		47.2384		35.2702		51.7959		43.2459		43.3517
56.652										42.2098		31.8393				54.5518						59.5419		39.5486		51.9028		31.9096				32.6969				28.685		54.5791		49.6516		34.0007		53.5423		44.0264		48.9789
56.4245										25.8927		32.0457				50.3523						58.6993		41.36		53.7198		38.5047				31.4905				23.9661		53.9326		50.3294		34.41		56.4982		38.6064		46.4963
56.728										27.5639		32.3195				49.1454						57.0665		40.8629		54.2102		33.5898				31.596				27.0654		54.0013		49.5397		36.5055		55.6645		43.1484		34.3604
50.0111										33.6524		31.8438				59.9701						59.7777		40.7116		54.211		33.136				35.3855				33.8625		55.4241		51.2595		35.7104		52.7436		34.3414		49.4021
50.928										30.112		31.1571				44.898						57.3084		38.1362		50.8241		30.6411				33.0896				28.7637		55.8649		51.5279		36.0631		51.2956		34.9414		40.7071
57.2228										45.9553		31.203				55.7973						54.7001		40.9248		48.4714		33.947				31.0304				27.2778		54.6121		48.0642		33.7489		51.4313		38.8488		52.7398
51.837										40.1828		31.6128				54.7555						56.5319		41.2466		53.0341		32.4343				34.9925				29.6725		54.9523		47.4829		36.8815		55.8693		38.457		39.7354
53.0488										27.1137		32.8521				43.8239						55.6413		39.8888		49.1085		31.4594				32.9278				23.8832		55.9978		47.6441		36.7402		51.1475		44.4423		34.8193
59.0522										46.0021		31.802				54.3909						57.1136		41.4136		53.3764		33.0084				32.537				31.7101		55.8579		51.2666		36.4069		54.5878		42.5551		43.6071
56.1319										18.9315		32.853				53.7763						57.3255		41.3125		54.8935		33.3369				34.3034				33.8957		55.9764		50.9289		34.218		56.3125		39.5451		35.9951
52.897										18.9007		31.2509				55.896						59.8351		38.7735		46.574		37.8673				35.815				28.1208		52.3643		48.0245		34.7299		56.5075		35.5501		55.0206
58.8095										41.9658		32.1848				53.3528						55.4919		39.3721		45.4754		33.0189				33.0288				28.1928		52.4459		50.1574		35.9637		53.8495		36.6303		43.0394
52.4352										21.7136		32.1119				47.7106						55.9952		39.2855		45.6587		32.8988				32.8856				31.2577		54.7218		46.3484		33.3962		57.7358		43.8097		34.5106
53.8428										20.9475		32.346				59.6381						57.6802		41.4586		52.2166		38.0054				35.4335				33.2559		55.3308		50.5287		37.0858		58.9494		40.5014		55.7369
50.3059										29.144		31.6548				47.7432						59.5343		40.5919		45.9556		38.9229				30.4033				23.2437		53.8887		50.6339		33.3649		58.4577		38.0388		45.4433
54.6874										16.1641		31.332				55.3667						55.1322		40.9777		47.1946		30.2943				34.4387				26.3262		55.3264		46.4379		36.0279		55.0167		35.519		52.3904
56.4815										22.8616		31.0521				46.9447						55.1405		38.9271		54.0783		35.2165				32.558				33.5217		52.9459		51.6108		37.648		50.3515		41.4651		42.4035
55.0706										26.938		31.4745				43.7491						56.4518		41.3793		54.8469		31.8928				34.709				24.6056		55.567		48.5092		37.9374		51.8679		43.9764		48.2521
58.5393										21.2177		32.0856				49.5297						59.1916		41.4987		54.2941		33.1413				33.6645				32.4756		53.0922		46.4584		33.311		53.9447		38.2547		55.9771
54.4353										22.8657		31.7655				42.571						57.4555		38.179		46.6267		35.6597				35.9298				25.3107		54.9004		50.8349		36.635		54.2199		41.4085		34.2568
51.2892										16.4166		32.1285				50.9081						57.9869		39.1599		53.4102		31.8355				35.101				23.0785		53.4563		46.7355		35.4496		53.298		36.0558		39.5801
52.1677										37.598		31.6336				56.2122						56.6096		38.2248		52.5347		34.253				30.7186				26.261		54.4749		47.8124		33.56		55.0686		37.3945		38.7433
51.4433										18.404		32.5732				41.6197						58.8581		39.0402		45.1602		31.5955				31.4305				32.9551		54.5413		50.7718		34.3144		58.4817		36.4195		36.0632
54.187										47.1587		31.5564				49.7341						57.6908		41.044		49.7805		30.4243				35.6747				31.9971		52.1301		50.8171		37.8529		51.3536		36.9084		38.8172
57.8603										23.8173		31.6904				56.062						54.0339		38.7422		50.4088		39.7762				32.2249				25.4001		53.3651		48.4944		36.0923		59.9225		36.2956		52.9836
50.902										27.304		31.6504				49.8602						55.951		41.3324		51.417		34.0274				33.4222				23.8555		55.2036		46.7452		33.7677		53.0266		36.5311		35.0063
59.3014										43.9993		31.6104				55.7452						55.5284		39.2812		52.844		36.3531				33.6208				27.9863		52.8002		50.1036		34.213		59.7148		37.4907		43.586
58.4326										43.3363		32.8909				51.0679						56.3628		40.5193		48.6422		30.9918				32.6317				33.0713		54.0836		51.9594		35.7809		58.584		44.3327		51.7523
55.9272										46.4549		32.529				55.5883						55.0317		39.1845		54.8713		33.7936				32.0894				23.5909		55.1245		51.8854		35.1628		54.9405		40.6852		53.6592
54.5571										30.8526		32.7358				50.9156						57.7593		41.671		45.9789		36.027				31.6695				32.2915		52.9265		48.2844		34.0634		57.5078		34.3509		34.8579
51.6984										44.2461		32.8134				50.7614						55.3772		38.535		54.6691		38.5651				32.4554				27.4756		54.3428		48.7879		37.1895		57.9963		44.2831		38.0594
57.0789										18.5376		31.5788				57.9669						58.082		41.7095		46.9704		39.7851				35.8931				28.8288		53.228		49.9029		33.2077		57.4257		40.7855		36.6646
51.6926										20.814		31.107				56.273						56.4083		40.6008		50.1457		31.7526				31.5397				33.8534		54.0983		49.5072		37.0657		55.6767		37.1867		51.7455
53.781										46.6333		32.7746				48.0922						55.7834		41.0064		48.592		32.0988				33.127				30.7283		52.6341		46.5882		37.8682		57.5615		37.8552		40.9961
56.8133										24.397		31.1622				41.308						58.0444		39.527		51.024		32.4302				31.4747				28.2075		53.4226		48.4794		33.4512		55.4408		37.4364		37.9987
55.3017										45.1188		32.5386				46.7452						58.5031		41.9953		48.9466		35.747				34.1918				29.0684		54.6428		47.6627		33.7811		59.7998		43.8925		54.2742
57.8898										23.5425		32.193				57.0822						57.0102		41.6882		46.3067		31.5217				34.5504				26.8193		54.2186		51.2626		33.2903		57.1348		41.7346		47.732
55.814										37.5953		31.8201				49.1102						58.4468		39.4904		52.0096		38.7405				33.5167				24.3032		55.4966		47.7878		36.397		50.7301		39.2228		45.2545
56.3253										40.5911		31.8657				44.5109						54.1839		39.2566		45.8071		33.5617				31.5911				28.4501		52.412		46.8202		34.0416		53.1243		42.5316		55.3443
56.5595										22.2888		32.6652				52.7905						54.1089		40.2812		49.6638		37.1849				31.971				29.3521		53.5674		50.7649		37.5418		59.4325		41.3148		53.7495
56.8464										32.5763		31.0787				51.8157						56.7562		38.0683		52.7467		35.0602				30.2739				25.1836		55.8267		50.3902		35.3872		54.6028		37.3622		48.5467
57.6538										20.502		31.9779				41.0028						57.5641		41.6816		49.2702		39.5082				32.6079				27.9187		52.9663		49.5245		33.253		53.0422		37.9098		53.2534
50.0159										25.0144		31.3385				45.3961						57.6759		41.2364		51.3739		38.1271				34.619				23.5464		54.0719		47.9138		37.5607		53.1749		35.244		36.6696
53.4241										30.0872		32.3827				46.2555						58.939		41.5476		47.7996		36.0716				34.5599				26.0017		54.4403		51.2749		36.4407		56.4137		37.0322		35.5
53.9851										35.1701		32.0232				47.6073						59.4888		40.2486		53.8781		33.885				32.2665				28.9572		53.714		46.3611		34.9097		51.4605		41.8916		50.2324
56.4749										25.7007		32.6011				46.1571						54.216		40.6681		51.5775		31.1575				33.2523				30.7168		53.5515		46.9847		36.866		57.365		35.2068		54.2424
58.3149										36.2373		31.1838				54.4235						58.3015		39.7323		50.91		33.6109				34.7514				27.5346		52.5567		46.5762		33.5972		56.8906		42.6362		47.6555
52.8537										24.5688		32.9102				47.893						59.2821		38.8668		46.548		32.8806				32.5988				33.7331		54.2915		47.8731		37.0941		55.4323		40.4068		34.168
54.549										43.3323		31.2657				41.3901						54.7636		38.681		52.4465		31.7469				35.5935				27.6638		53.5436		51.9347		36.2827		50.4433		40.8796		53.4082
55.0607										40.4146		32.3095				48.4373						56.4131		39.3388		47.7229		32.9811				33.2639				27.48		53.0211		50.2048		34.161		57.4346		35.6626		37.0957
59.2406										31.6644		32.9196				58.4935						55.0771		38.7094		54.1298		34.3531				35.5781				23.268		53.2224		49.98		37.1102		50.2657		43.075		41.7222
59.2374										22.4558		32.3001				48.5996						58.7135		40.1229		54.9664		36.2164				35.1827				33.0519		52.0899		48.0116		37.2613		54.8893		37.557		47.8617
58.041										43.7993		32.5049				50.2603						59.448		41.7641		52.1718		32.2806				33.2568				25.3484		55.1124		49.1798		33.6753		57.7894		42.9531		36.5651
53.4113										22.7758		32.3534				43.6611						59.1196		39.5284		54.383		36.4281				35.0649				30.521		53.3111		49.7575		37.0649		59.6504		37.7799		34.8533
53.4313										41.1918		32.8998				58.2306						56.4982		41.0276		47.5222		35.158				35.8107				25.8145		55.1842		47.9263		33.6873		59.0894		43.266		37.5698
50.2751										26.8832		31.8406				45.2191						58.8418		39.8656		51.5937		35.7194				32.8442				30.6161		53.0983		49.8616		35.3058		57.7751		35.1281		54.1074
56.6385										34.1718		32.734				51.3196						54.1392		38.1689		53.7104		33.6918				32.5234				25.6681		55.9203		47.3439		34.8559		53.4493		35.2764		46.0611
58.777										39.1065		32.2962				51.297						54.4676		38.5659		50.4973		34.5032				30.2379				24.7123		55.3527		51.9196		33.5301		51.7899		43.1258		47.687
50.2738										43.7167		32.189				51.2706						57.3974		38.8821		54.1975		30.9108				32.0161				26.6299		53.2461		49.9106		33.9942		57.5136		44.2869		50.195
51.7059										41.0331		32.8972				42.9951						54.295		38.2329		53.4436		33.9729				34.527				33.3221		52.1644		48.7443		35.7443		57.898		37.98		44.7669
54.3468										42.8578		32.1955				58.5044						56.9204		38.8883		54.1642		33.9905				34.0792				29.1748		54.3278		48.8179		36.9824		52.6016		42.6844		40.4357
55.4609										43.6008		32.57				45.6222						56.7344		40.2999		54.4007		32.972				33.944				27.3295		55.4845		50.9344		34.8731		57.4355		36.938		50.0414
56.507										25.4033		31.0026				59.3914						57.9764		38.4113		51.0237		37.0483				35.0221				30.2251		55.7608		50.8363		37.4881		58.3548		34.84		37.8445
59.0771										20.367		32.6157				53.6029						56.2999		40.9517		50.4375		37.926				32.3701				26.4869		52.2975		46.6177		37.0865		50.5361		42.2493		55.1822
50.2483										43.5508		32.4681				53.314						56.5392		41.9591		46.5567		31.319				35.0877				25.0874		53.9615		48.443		34.3719		51.878		43.7705		37.9583
51.1632										40.0241		31.8105				58.7819						57.6646		41.1082		50.9295		30.0935				30.6906				23.6766		54.1985		51.4467		36.2218		55.3298		40.6002		53.5368
52.0965										35.8867		32.953				40.0742						56.5004		40.2331		54.7152		34.4188				35.9785				26.2368		54.6414		46.0858		35.4316		52.7117		38.7608		39.1096
50.8743										37.1832		32.1951				49.236						55.699		39.2874		48.6853		32.7501				31.1798				30.9045		55.2335		47.7698		35.1212		55.5566		38.5696		38.6824
50.6419										44.0038		31.8557				40.0468						55.6485		41.8271		46.5016		39.6955				31.1541				28.1581		53.6128		49.152		37.5235		51.5726		44.0949		39.1918
57.2799										46.1944		32.928				43.5096						56.2949		41.4388		46.0451		30.4034				34.1946				30.9481		53.9557		46.1535		34.3791		55.5235		38.4256		35.6917
51.014										29.9903		32.7259				52.3224						58.79		41.043		46.006		36.8585				32.3707				23.063		55.6704		49.5876		36.6357		55.8734		40.4279		52.5309
53.0663										23.6044		31.7511				54.1954						54.2648		39.9031		54.4904		39.4745				35.0131				26.8001		52.8992		48.2743		35.7683		54.6764		35.4613		36.8109
51.594										25.1688		32.7317				55.7499						56.6854		41.4222		51.1651		37.4876				35.7851				28.0414		55.2869		48.2792		36.1801		58.2488		39.8692		44.6627
55.118										22.2706		32.7769				59.0465						57.5377		39.8205		53.3209		39.4529				30.9432				27.5748		53.7307		49.5072		33.3092		58.3305		34.4868		55.53
51.1484										29.2451		32.183				52.1727						54.0958		41.2026		49.9866		32.5282				30.4227				32.0899		55.7167		51.4423		34.806		54.7626		40.4178		38.1087
51.0802										18.5708		31.959				46.6036						59.5035		40.8846		50.9625		30.4489				30.506				25.1569		53.9572		50.5401		37.8518		51.1109		40.2061		47.8969
53.022										26.1498		31.8892				54.4546						56.4155		40.9884		50.0149		36.3069				34.7617				23.137		55.4286		50.6768		35.7491		56.6434		39.3735		41.5418
53.2413										41.3572		31.7163				43.0975						55.759		40.2256		51.8325		31.4847				30.6174				23.6224		52.298		49.047		36.4436		55.1177		37.1229		40.5082
54.3869										44.4457		31.9685				57.5333						57.1469		39.2974		48.0968		33.9507				35.1824				32.9862		52.4418		46.2631		35.9499		56.2248		41.8526		48.2427
52.518										18.4505		32.9472				52.0013						58.6102		38.1147		45.5636		31.0045				34.4116				23.8651		54.6778		47.9563		34.7727		53.1009		40.4727		35.7851
55.521										32.4477		31.4629				52.5385						56.5779		40.7176		51.0438		32.9636				33.6647				29.8471		55.0079		51.7754		34.5452		52.5016		34.6305		49.2985
59.9014										20.2156		31.6619				44.9094						59.5908		38.3708		54.8852		33.2601				33.5313				33.3284		54.9781		49.0316		35.1796		54.5679		39.8169		38.1464
54.8616										44.7548		32.3688				50.6955						59.5768		38.517		54.4144		34.9955				31.2655				32.5795		53.635		49.4928		34.7075		56.0724		40.031		43.2002
54.6933										43.2873		31.1435				44.4492						56.9669		41.6873		54.2292		34.2961				34.3209				28.9375		54.267		48.1728		33.2431		51.6665		36.5907		50.5809
51.8829										16.1031		32.1436				40.7772						59.9807		40.2921		52.3722		38.1683				31.8436				31.0222		52.929		48.9977		33.7408		52.3297		35.578		34.4854
56.4826										42.0477		31.3372				47.9208						59.6376		38.0464		49.1043		31.3295				34.2192				32.6132		54.285		51.2898		35.1756		57.3095		43.7357		35.4783
52.3405										43.2697		32.29				41.9341						58.1869		41.1319		53.914		31.7414				34.5228				27.8378		55.8289		46.8099		36.037		50.5719		37.9531		36.5276
55.4312										22.1113		32.148				49.7926						54.5058		40.9816		50.2095		30.1892				30.4503				29.984		52.1671		46.3313		34.0224		51.16		36.1867		36.0419
57.525										28.4997		31.4902				57.6342						55.2201		41.8503		54.1066		31.5979				31.3107				30.3091		55.9372		49.9241		35.2197		56.4029		37.8785		50.0948
54.7129										40.4462		32.0377				41.5602						58.1555		38.4208		51.1217		34.8112				34.4775				27.6608		55.7417		46.4955		37.8783		54.636		39.5451		45.4816
50.6766										18.9497		31.2397				44.5844						55.4896		39.6891		54.156		39.1271				35.8568				30.2617		55.8989		50.375		36.4981		55.388		34.0622		43.7628
59.1408										20.9502		32.964				48.7614						54.6974		40.3409		51.7432		39.4391				34.8265				29.9721		54.6294		47.8817		37.8108		55.2869		44.6332		49.1807
54.4266										40.6735		31.0936				56.358						59.7784		38.5556		45.315		30.45				34.2096				25.1535		54.9471		46.5664		33.2192		53.0648		34.7891		42.3222
53.7477										22.0286		32.8365				48.1727						58.7068		39.5378		48.3232		34.7407				34.0668				23.3128		55.8625		51.0576		36.1944		53.0787		38.1531		40.4693
55.0082										33.028		32.3969				42.4871						58.6947		41.6497		49.0373		39.6959				34.8096				33.2336		55.7205		47.5559		34.0717		59.6212		34.6206		37.5824
56.0134										26.1932		31.5669				45.9991						57.6005		38.5196		49.833		37.6473				30.2552				31.2006		52.3592		46.4557		37.1812		57.5862		44.5468		34.4429
50.8673										20.3582		32.1835				56.5053						56.0161		38.7447		53.8019		38.4772				34.696				29.5781		53.2749		47.8119		35.4654		51.9655		41.9951		35.3844
54.1657										35.777		32.4911				42.4304						55.0224		38.4692		51.0695		35.6				30.8694				24.8603		54.5621		47.4918		36.1917		51.402		41.9624		47.6073
54.2052										36.2872		31.8188				46.9614						55.037		40.8187		54.2833		37.4821				32.8382				33.1317		55.4621		51.6474		37.4764		58.6802		36.7372		48.8297
53.8502										42.2594		31.5187				47.5539						57.8084		38.0111		47.1371		35.6992				32.9779				30.6278		53.9174		50.7692		35.9809		51.99		42.383		36.5262
55.3597										47.7389		32.4451				44.1641						58.3311		39.5946		45.3859		36.3406				35.7935				29.5804		53.6602		47.9456		36.9137		55.2749		43.8983		45.1279
52.3991										27.7254		32.1179				53.5123						57.7194		39.5837		49.8847		33.7213				32.4887				26.1207		52.8009		47.9759		33.3344		57.2613		34.3354		45.8583
53.7392										16.0061		32.4722				49.0084						58.0609		40.9388		53.1737		35.4785				33.8796				26.0861		53.7617		51.5098		36.1288		56.0528		38.6422		40.1357
58.0718										22.4619		31.776				56.0684						54.875		39.0657		52.8849		31.2325				33.3691				27.8844		53.9853		48.5636		34.8535		50.8594		35.5352		36.9499
58.8135										44.5836		31.0763				58.2441						59.8276		38.3645		50.86		37.4986				33.2016				30.7794		54.7649		47.0008		37.5357		51.3738		40.8932		53.1527
58.7926										45.3279		32.1508				55.4706						56.3595		38.9695		50.5295		35.9136				30.5525				27.5311		54.7408		49.6007		36.8227		51.493		36.385		43.9507
59.8455										38.0279		32.3008				54.467						57.1821		39.5965		50.9985		37.1289				35.484				25.0346		54.7582		50.5864		36.0737		58.0209		37.4351		40.1373
55.3672										18.7701		31.8308				58.8727						58.3064		41.1564		49.5772		32.7904				35.7531				28.7845		52.4333		48.2732		33.541		58.2707		36.6272		48.1829
56.1476										43.2708		31.3103				58.5061						57.1075		38.08		53.4037		34.8012				35.6448				31.2055		53.3725		46.0029		33.8287		55.9486		39.2035		47.5987
52.0204										38.4359		32.8043				41.2133						54.3687		40.8424		50.7002		37.887				32.6254				27.8671		53.6713		51.2792		34.5013		57.9618		37.6593		41.0651
58.6018										31.8591		32.6037				55.4769						54.3903		40.6265		52.1971		31.8869				32.9851				33.6785		52.1396		48.3761		33.2299		55.2503		36.3559		44.062
54.4925										24.1941		31.1623				53.5122						54.1063		38.8403		53.9391		37.678				33.763				24.0454		54.5065		46.215		35.8556		54.487		39.8006		40.2675
53.3834										45.2749		32.0553				58.5601						54.7297		39.6194		50.3634		38.404				31.3686				32.9005		53.0802		46.2652		36.993		59.3918		34.6982		44.6077
56.7479										22.591		32.8962				54.0771						58.2442		39.476		52.2233		32.515				34.2593				32.7868		53.758		48.6247		34.0626		56.7294		44.1383		49.9196
51.5005										34.2761		32.5743				58.0124						56.5446		41.7272		47.5212		33.9144				34.8838				31.1561		55.242		50.56		37.072		53.0494		36.3679		55.7208
57.1159										33.773		32.0337				45.2195						55.729		40.0673		46.1816		32.6936				32.2966				27.2984		53.9197		51.4355		36.8341		56.1652		34.7568		48.761
53.0265										24.251		31.6959				54.682						56.5766		39.1848		52.4908		39.5702				33.5232				33.5651		53.3864		49.1119		33.6709		55.9508		38.5399		45.7069
50.1473										40.4528		32.8065				48.2247						54.238		38.8317		48.5031		39.2598				33.0299				27.2857		54.6024		46.7839		34.1953		52.9276		35.204		51.5327
59.5542										36.001		32.868				44.4369						59.635		40.675		54.3916		37.4861				31.0473				33.6079		54.2233		47.9362		36.3909		51.9011		38.3446		42.823
55.7058										36.8247		32.2971				59.1299						59.5788		41.1237		46.9465		38.5427				31.085				23.8683		55.3962		49.5504		36.0317		54.507		38.7232		38.1337
52.0002										35.7666		31.0898				59.3						56.6337		41.7284		48.4234		30.3906				31.7412				26.7433		52.5336		46.5304		35.2555		51.0869		38.4854		38.8779
52.4725										23.476		32.7392				53.8213						57.9483		40.9924		54.6161		30.1426				34.7182				23.4196		52.4422		47.4661		36.4692		57.6982		38.7626		49.0849
55.3974										18.7207		31.4008				50.3855						56.684		41.4214		50.6896		39.4064				31.2202				26.0032		54.387		51.1648		33.6401		51.8629		38.8243		53.7635
51.3228										17.2239		32.0237				59.286						56.2498		40.1482		51.84		37.9821				35.0521				31.0599		53.8364		46.0114		34.0914		55.2556		40.0624		49.2787
50.1755										17.5979		32.8044				57.9856						56.6106		41.3756		47.8165		34.2194				32.6157				26.2227		52.7633		49.2047		33.9242		55.6615		36.5819		44.1052
58.0688										47.6399		32.4612				42.4174						55.1113		39.9056		53.5588		34.093				30.4169				26.2074		52.0021		50.1099		35.5494		51.3361		43.5277		39.2392
55.9297										46.9339		32.6268				53.9323						55.7747		40.1566		46.3464		34.2013				32.8813				31.6915		53.6487		49.5921		36.2768		55.209		37.3755		54.2946
53.8229										42.1655		31.322				54.7676						57.6696		39.9411		50.6307		38.8763				34.3688				32.5828		54.6062		46.3425		35.0239		50.0816		43.5015		35.5652
55.605										16.9473		32.8388				46.6854						54.5807		38.0923		46.0812		34.3074				34.1568				29.4821		55.0762		46.1136		34.3129		55.337		36.4286		42.0824
58.8491										39.3526		31.6417				58.8206						56.9413		40.2562		52.7335		36.6488				35.833				23.5615		53.4314		50.9205		34.4219		55.9699		42.9649		39.802
56.771										28.0925		31.7649				48.6812						54.0682		38.7092		53.6433		36.0903				30.6465				28.1797		55.2653		50.8078		37.8923		51.0224		41.0705		37.625
51.7778										34.7667		31.5576				58.0045						55.2106		38.2272		47.4531		35.207				34.9936				26.088		53.3585		48.3166		34.2643		50.6293		39.4793		43.7454
53.8309										28.547		32.6238				52.5069						57.678		38.562		54.9391		32.6126				34.1515				31.61		53.9645		51.0091		33.5253		55.7436		36.0265		52.7791
52.0504										44.1903		31.5126				41.8005						58.3178		41.0767		53.17		35.1004				32.7783				28.2933		55.0099		46.9535		35.9478		53.4742		34.5742		46.5919
53.2872										19.4274		31.7688				58.9191						55.5805		39.0251		53.8436		32.2996				35.9864				33.3088		55.9156		48.4089		35.7493		57.6739		43.2068		51.4606
54.0985										22.7565		32.9969				57.5748						54.958		39.6119		46.8589		39.3003				30.7915				30.783		52.7242		49.9508		33.8557		57.8978		37.7821		48.3956
56.8853										44.5856		31.4654				47.7618						55.5818		38.4546		47.2399		34.2315				35.6421				30.2358		53.7446		49.5139		33.6819		54.1317		42.9186		48.8638
54.119										29.0146		31.071				48.42						59.8512		39.5405		51.277		32.8536				31.4591				31.0321		54.4718		46.8326		34.9367		57.6454		37.9187		38.1309
56.912										19.766		31.0435				40.3745						55.8152		38.4957		53.6936		36.658				33.4116				33.8049		52.177		50.6963		33.2513		52.477		34.5937		50.3905
58.9256										35.9471		31.7863				53.664						58.0466		39.3672		49.4451		33.5782				35.9122				28.5809		53.6432		48.1508		36.0028		54.9347		34.644		45.4965
55.5664										27.9835		31.7624				59.4041						59.0494		38.5629		47.862		39.0549				32.0496				24.9418		53.2764		50.7068		34.6081		54.8791		39.8704		40.8905
54.0922										16.1934		32.246				56.3979						56.384		39.6807		52.0093		36.639				32.3484				31.4393		55.4386		50.1435		36.5049		56.7484		34.4981		51.1055
59.6749										34.4112		31.0147				58.4607						55.1125		41.6479		52.4521		31.1313				33.0415				33.235		52.5543		51.1853		34.467		57.7978		39.8267		39.47
56.3163										16.6139		31.663				46.0839						57.6298		38.3064		51.7215		32.3437				34.8696				28.1498		55.0647		48.2295		36.1388		56.4015		42.8161		48.8801
56.8347										29.5165		32.8171				45.0371						56.5907		40.9251		51.2819		37.7332				33.864				26.2581		52.6216		48.8846		33.7163		54.2331		37.3804		52.9508
55.8788										25.7779		31.4067				56.3281						56.7163		40.4018		48.2218		38.6717				32.4579				28.7695		53.662		46.3299		33.5602		52.2987		36.9617		37.6313
55.9215										26.581		32.6544				50.5693						55.8215		40.1449		48.2742		38.0598				31.4969				26.7954		52.842		48.0742		35.5888		53.5272		34.2976		50.2325
50.5248										42.5551		31.9303				45.4391						59.0394		41.6691		52.5389		36.9391				30.021				28.8166		52.017		48.056		33.8567		54.0502		39.0871		40.9084
56.7617										31.7382		32.0255				53.6509						56.2989		38.4243		50.148		36.762				35.7101				26.3237		55.8114		47.0457		36.9243		51.6101		35.9501		49.3499
57.1545										36.9651		32.9899				41.2584						55.4336		38.5603		46.4279		39.3257				35.4508				29.8372		54.3572		50.9467		36.7863		52.9571		40.1977		45.1002
55.9271										35.6538		32.3138				45.266						56.7623		40.4036		51.8022		34.7282				30.4204				24.2568		52.7768		46.9872		36.5452		53.0391		40.0024		34.2618
50.8647										26.3724		31.3784				47.9026						57.3265		38.4955		47.6381		34.6553				30.5582				26.3602		53.8266		51.0055		33.2104		57.6771		35.677		45.9497
54.4696										18.7332		32.0606				59.8174						58.2824		38.9356		47.3044		36.092				35.1785				26.0473		53.42		46.7762		34.1066		56.382		39.3502		39.5334
58.0908										28.5514		32.6371				43.512						55.7261		41.2851		45.6686		33.6543				33.1706				33.5623		54.0798		46.9619		35.1239		53.941		44.7815		37.704
53.0755										40.5905		32.737				42.0696						57.9752		38.5017		45.9066		32.6977				31.785				24.9799		55.0671		48.2672		34.9776		57.3159		41.4095		51.1522
51.7439										31.8289		31.267				44.6006						58.1907		41.153		52.112		39.0128				31.4152				29.9831		55.8963		47.9515		35.6048		57.9134		43.2996		43.3297
57.5805										28.2928		31.0478				53.9107						54.2083		39.698		45.251		39.9234				33.2164				24.1716		55.6251		49.9508		36.9943		55.9959		35.1764		40.2132
50.0969										27.151		31.777				57.1312						57.7182		41.5745		53.036		31.1684				31.1637				23.1118		53.6906		48.8654		35.8689		53.2088		42.3512		55.0593
54.3116										32.8587		31.1263				44.3013						59.299		40.8538		53.2133		37.5028				35.8338				26.9911		52.6616		51.2783		34.89		57.5248		38.1114		35.3602
54.9907										35.9887		31.4719				58.592						55.9153		38.7036		50.6767		36.7163				35.765				33.5879		53.5769		46.7962		33.8541		57.3803		40.9692		55.5325
52.4936										24.5664		31.9567				40.4849						55.8155		38.1493		46.3432		39.6764				34.1639				31.3628		53.2071		47.4212		35.6202		56.3817		39.2538		36.6439
53.465										43.6135		31.8555				43.2126						58.9477		39.8475		47.7583		33.8311				30.0944				30.7857		52.5673		49.2775		34.5368		54.5036		38.0332		36.5653
54.5331										28.9377		32.2248				41.4771						57.5138		38.8059		46.4756		32.8908				33.5176				28.4398		52.428		51.6727		35.7952		58.516		37.7314		40.6048
51.645										28.4419		32.0441				55.3116						54.4874		39.2812		53.8041		37.9419				32.3259				28.9134		52.9013		51.2985		36.566		53.9071		37.0445		36.6348
55.6681										16.768		31.3193				48.5552						55.2769		40.4979		53.2178		39.5337				30.8126				25.7528		52.2752		46.2484		34.0907		55.0631		41.4879		52.6418
51.9263										15.9749		32.073				56.7435						59.5378		39.5861		45.4916		37.5782				33.3182				27.0889		53.3057		46.3166		36.7693		59.2336		38.9471		52.2315
54.9513										41.3467		32.456				41.7937						58.389		39.2654		45.5129		37.7566				31.6397				29.5939		54.4983		49.6137		34.7863		56.7582		41.9296		39.9864
59.2185										32.2736		31.9604				45.6341						54.1268		39.3524		46.4548		39.6106				31.9766				29.8797		53.625		51.7767		34.8825		58.6178		34.981		41.88
59.0271										30.5329		31.2925				48.0687						59.619		39.2928		48.411		35.2314				34.8066				23.0939		53.6297		49.6777		37.7391		58.1309		39.4658		53.366
54.5205										16.9677		32.8664				47.6274						55.0252		40.5981		49.4376		37.1643				31.678				33.66		53.0588		51.2536		34.3735		55.0658		41.2338		42.1128
54.6656										26.0451		31.8858				50.6469						55.199		40.6214		50.6979		38.5242				30.6984				32.5823		53.8381		50.3076		34.3436		50.8872		39.572		48.2043
53.8527										44.663		32.2598				50.0201						55.1899		41.9918		45.999		31.2067				32.1915				27.3335		54.572		48.7086		34.1278		50.4107		36.9418		38.8225
58.5781										33.9825		31.2423				49.0399						55.2977		40.3216		51.2102		31.0934				31.8698				26.9546		52.3096		49.0629		36.9159		52.3847		38.073		38.6109
58.9329										26.0739		31.2081				59.7961						56.4284		41.6419		53.2165		33.3662				30.6422				24.8955		54.5254		47.5639		34.711		52.3178		35.1995		50.108
57.2362										35.2383		31.2961				48.8715						59.0558		39.468		52.3509		33.8375				30.3185				24.3381		54.2147		49.7766		37.1792		57.884		38.6762		51.9063
59.915										42.8077		32.4497				46.2637						54.2016		40.0115		54.0822		30.2872				31.0302				30.9156		54.6092		47.0834		35.3787		57.4072		37.9815		55.3555
59.1142										24.1632		31.2272				41.7824						58.5116		39.6151		49.9877		33.3227				31.6241				28.4388		52.4885		49.4117		36.8679		55.8013		38.3055		36.5405
50.7318										41.6082		32.9813				55.7878						54.6763		38.5021		52.0819		33.0565				30.2621				29.594		54.8049		51.5134		33.5068		53.6972		41.2385		37.2741
55.6666										20.5941		31.2096				54.4613						57.8324		39.6188		47.4038		37.0788				35.8661				29.0819		54.7411		48.7189		37.47		55.2514		43.6512		38.1657
51.6724										26.5885		31.9136				45.6318						54.5965		41.427		47.1704		39.9073				35.7144				24.4442		53.248		47.8764		33.9936		50.9964		40.7444		38.8075
54.0209										23.7916		32.8345				56.3297						58.733		39.8102		46.8599		33.2961				30.2324				28.2841		55.3313		47.2583		35.9815		54.7038		44.868		43.3779
59.8652										22.79		32.5475				56.6962						56.1722		38.7307		50.484		37.1946				30.9359				24.2152		53.2117		46.6777		37.8027		52.7167		36.999		47.3988
57.5682										26.1977		32.8476				57.9005						59.7889		38.5325		50.8473		35.49				31.382				23.5165		53.4572		51.6633		37.4447		59.8388		41.564		52.3883
54.2924										37.9366		31.0205				54.7219						56.0465		41.3685		46.8762		30.1847				32.2978				26.2224		55.9619		51.3436		35.6802		52.9925		36.2798		50.0849
52.3421										33.8545		31.9124				48.4735						58.6303		38.6114		53.8083		30.3861				30.9336				32.0265		55.8352		50.4126		34.9598		50.5202		43.8539		47.0222
54.8										30.1979		31.8941				58.5675						57.1125		41.7632		46.5348		37.5718				32.4931				31.2108		54.0113		46.2593		37.2813		51.6665		41.7859		55.6358
58.1139										47.535		32.2366				40.8669						54.4905		41.0961		48.1317		30.2238				32.8705				26.7305		53.0921		47.4243		36.8762		55.9463		43.8976		39.6017
59.5059										43.7455		31.0386				54.0877						56.0711		39.318		50.1315		37.0007				32.4234				25.9355		52.337		50.7632		37.4966		50.8399		40.6038		44.2098
58.0591										38.7582		32.9704				50.5335						59.6772		40.0228		54.283		36.7602				30.8824				32.3811		54.8583		48.1223		37.3635		50.1796		44.0108		53.9127
54.5146										33.4824		31.2179				44.0448						57.9782		40.1083		49.4058		36.5424				31.3632				24.3737		52.2769		48.9996		37.0254		58.1692		42.8353		54.3116
59.1296										30.1632		32.8564				55.277						55.5963		38.0804		51.2027		34.6268				33.6529				29.3667		53.5563		50.1438		34.2612		52.9609		34.154		45.4694
59.7492										43.6055		31.0626				56.4008						58.8388		39.22		47.5601		35.6266				32.6448				24.8755		52.8528		51.0153		37.5092		52.2943		38.1603		50.3984
59.9994										35.7059		32.0212				41.3566						58.6966		40.4967		52.0845		35.8055				30.807				23.8977		52.4769		48.157		37.1123		54.7192		39.2599		40.8128
50.9358										40.7262		32.643				43.2489						59.897		39.4968		48.2535		39.9383				33.9936				30.5736		54.7876		46.5998		35.3479		55.2019		37.0995		42.8279
59.0731										32.9811		31.3551				45.2985						55.1688		40.0563		53.8218		39.0938				32.5682				26.5178		53.4017		48.2801		37.9961		53.4368		44.8		49.5674
51.7813										18.6344		32.1541				50.4809						58.0799		41.595		47.1088		31.7857				35.3453				24.6517		54.4758		49.7314		36.4752		55.5994		36.8382		50.2129
59.5182										19.3979		32.6675				56.0638						58.1983		40.8373		54.2178		32.9579				35.1136				27.2943		55.1606		47.6128		34.3009		55.1393		38.122		52.6529
59.4233										46.5299		31.3447				49.6187						59.9983		39.4105		47.398		34.3279				30.5821				27.9783		54.3787		46.9848		35.7511		58.1652		38.4844		48.2791
51.6972										19.2252		31.6191				43.8506						55.897		39.5665		47.1588		36.021				35.8972				32.0993		53.6632		47.0494		34.8625		54.3965		41.1858		46.5196
58.6313										34.7616		32.7715				58.6281						59.2044		38.2135		50.1182		38.179				31.8107				30.0318		55.8216		49.4663		35.5102		51.461		39.6856		55.5529
51.034										31.1752		31.4441				49.2297						54.9928		41.0733		54.6375		36.8317				35.8244				24.0055		55.2277		47.0791		36.0089		52.1769		43.5211		53.9861
54.3302										43.0994		32.199				41.8214						58.6689		41.3126		51.8519		38.7668				34.9232				27.6018		54.057		49.7931		36.9357		50.828		38.7279		48.0689
50.0695										20.4321		32.1601				50.255						59.635		40.5406		47.3371		39.214				34.2098				31.1367		54.9743		49.2855		34.9281		51.3831		34.664		37.226
50.7839										41.0118		32.9256				43.5919						56.9167		38.9218		52.076		32.6231				33.0113				30.7775		52.5329		51.4853		37.8968		58.0891		34.675		53.2476
51.1897										23.1703		31.6782				43.7299						55.7983		41.4855		47.0444		37.817				35.1165				28.9892		55.3188		46.8312		35.0404		52.4617		42.7367		46.0317
51.043										42.067		31.9344				40.4092						56.4616		41.8139		52.2856		33.809				31.0359				28.5423		52.4741		46.9475		35.9218		56.9792		44.518		36.9346
52.168										38.7046		31.7322				42.3481						56.437		41.7846		51.7661		39.3444				31.5141				33.3048		54.8376		48.5748		34.4677		58.6857		38.2679		47.3673
53.1004										36.5837		31.0759				41.7934						56.2314		38.3172		53.9283		35.2079				31.3014				29.8863		54.0529		51.0236		37.227		54.4887		37.3812		54.9424
57.6583										41.155		31.8319				40.4884						55.8064		38.3581		50.3725		37.3477				34.1144				31.6132		53.2124		48.044		34.4592		58.6368		43.3602		49.4486
57.3727										45.229		32.8582				44.6601						58.4094		39.1195		53.371		30.8234				32.0626				24.3028		54.622		49.2793		35.3789		55.093		43.8062		50.9274
51.4454										44.7711		32.6427				46.3713						54.2312		41.7367		50.0979		33.5771				31.5924				31.6365		52.8696		46.8161		36.199		58.4269		37.6772		46.6153
50.0574										45.1942		31.8824				58.9777						59.4643		39.8815		50.2712		31.5701				33.0026				28.0055		52.4446		51.6987		33.4462		52.2042		41.4248		41.0043
59.5611										40.8828		32.1429				47.3484						59.4604		39.9011		47.5502		37.3554				31.7286				23.3923		52.8483		51.8827		36.6507		50.6007		34.0194		53.0761
52.6204										25.2452		31.2906				58.9276						59.4835		38.8724		49.9428		37.142				35.3588				28.6882		53.9361		50.8729		37.608		58.7658		38.4165		47.6109
54.1083										25.2998		31.659				56.7544						57.5917		40.2755		47.321		30.7693				35.9751				26.0939		53.817		48.503		33.8368		50.3849		37.6477		38.5835
53.997										46.8348		32.6722				42.2763						58.8444		41.2702		48.5636		31.5159				32.1876				28.0598		53.7855		50.6351		34.1682		54.11		43.0154		51.8162
51.5054										41.3922		31.7159				56.1201						54.6064		38.5147		49.7527		37.9523				32.5762				30.1816		53.6754		51.8645		37.0233		52.7354		38.1196		44.7319
53.7159										22.6929		31.9377				40.6245						55.7656		41.5909		54.6559		34.6357				35.0354				31.4743		54.5367		46.0056		35.5352		57.9332		36.5816		49.8394
53.4553										28.3837		31.9093				47.9431						55.1083		41.4228		53.9242		30.3444				34.4633				32.2044		55.694		46.517		34.1846		51.6485		43.1282		36.6602
55.8215										21.7761		31.5922				46.1646						55.8866		40.9577		50.3385		36.7844				32.1985				27.3217		55.7101		46.6762		36.4516		58.2406		35.3485		49.962
53.4246										31.8517		31.5424				44.6715						57.0197		39.694		51.5988		36.2532				33.6204				33.6863		52.009		50.8152		34.2809		58.3741		39.9697		43.6137
57.3962										28.0355		31.3903				41.2123						59.2965		38.1459		49.8848		37.9578				31.2144				26.4584		53.0528		50.4974		33.386		51.2634		37.6303		35.4802
50.7396										36.6031		31.218				43.3294						59.2307		38.3715		46.755		34.483				35.2383				24.0397		52.9648		48.612		34.4247		59.7541		42.7001		52.5918
53.7721										18.1061		31.0621				57.5796						59.7682		40.6856		48.3027		30.2335				33.7314				27.0667		52.0848		49.5792		33.2095		54.635		43.0237		54.2185
57.9509										40.9558		31.0259				42.8496						55.1884		39.9597		52.3191		37.1538				31.5002				25.4896		55.5482		46.64		36.9878		58.5709		41.992		39.1464
54.4122										19.2814		32.7744				49.4503						59.411		41.7602		51.8643		33.0888				31.9019				27.2329		54.8461		51.008		37.7382		55.1957		36.3574		51.3865
50.9778										41.8682		32.6745				47.6108						58.9153		39.7335		52.7672		30.0291				34.1425				25.5918		54.6148		50.0459		34.0718		53.364		36.2378		48.9923
50.6999										25.3042		32.3299				48.3998						55.578		39.7831		49.1885		38.6222				33.5917				25.9021		54.8672		49.8159		35.207		58.7902		44.6763		49.3762
54.9789										23.4956		31.2964				57.2473						54.5593		41.2827		45.2588		37.7007				34.5674				31.9227		53.119		48.6022		35.4961		53.9155		40.4866		53.7063
54.6538										40.5183		31.5033				54.1848						58.754		39.7982		45.0539		36.8581				34.9323				25.0227		54.6973		50.2095		36.3014		54.5878		43.2684		39.3888
52.6541										31.8822		31.3035				57.7392						54.2832		39.8604		45.5143		31.8486				34.5943				26.838		53.3727		51.7695		34.1271		53.6672		39.2984		42.2918
55.0057										19.1151		32.1724				43.9359						55.6049		38.7895		47.8333		33.008				32.0891				25.762		55.7663		50.3622		35.82		57.6928		37.2543		34.9711
52.2804										33.1323		32.5663				50.9832						57.3719		40.0283		51.2081		37.217				32.8012				31.1341		53.3679		47.9485		36.3221		54.7681		44.8798		52.7859
56.7631										41.5079		31.4109				46.228						59.6129		41.1007		47.5517		33.5815				30.7822				24.3321		55.3795		51.0876		33.9943		53.1675		36.3087		53.9809
55.6619										35.469		31.9821				57.9362						57.629		38.6371		53.88		37.9698				30.8638				25.4127		53.1476		50.9636		34.997		55.8484		34.1244		49.3728
58.984										38.3953		32.2099				57.0799						57.296		38.614		51.2013		37.6342				32.6789				24.9081		53.8905		47.5995		34.2789		53.6328		38.5432		41.3446
52.0365										29.5472		32.161				40.0097						58.178		41.022		47.4901		38.7965				32.1428				27.3902		54.7721		48.6519		34.7314		57.4335		38.2825		41.6383
58.2266										19.7222		32.2618				57.5637						54.9308		39.4145		50.6415		39.0862				35.7686				25.3807		53.2537		50.906		35.479		54.1103		36.4632		40.2359
55.877										44.0393		31.2592				51.0706						58.5922		40.1054		50.1943		35.6723				33.4716				29.2491		54.9604		51.1233		34.79		55.3498		43.8351		45.4005
58.261										29.3931		31.9408				43.7188						57.2635		38.2856		54.2753		36.0201				30.5363				31.8414		55.5963		51.1535		34.6059		57.9786		42.9037		53.1225
58.9079										31.0219		32.8497				47.1361						54.4492		40.11		47.8752		34.1303				35.1981				29.5178		55.5531		49.4975		33.4714		54.9262		41.8552		51.3505
50.7163										26.5211		32.9629				53.708						54.2303		40.8347		52.6881		36.3302				33.6804				31.9307		52.1069		46.1905		37.8882		59.2049		41.2272		35.9938
57.5607										41.9681		32.8712				56.4443						55.0989		38.5945		47.5118		39.0479				30.1488				30.3635		55.1698		51.7459		37.4058		51.5498		43.8974		34.6855
50.7084										33.6408		31.9525				46.7352						56.4117		40.3566		47.4532		30.8646				35.5129				26.0897		55.9163		47.1659		34.6468		58.4011		42.261		54.9253
55.1507										20.588		32.9091				47.514						55.0677		39.691		51.5713		39.0277				30.7785				28.8619		55.2314		47.7196		33.3704		53.5084		37.8527		48.9393
56.8083										23.1453		32.8247				52.4928						56.5604		39.2491		52.4651		38.6136				31.9578				33.7319		53.9349		47.4022		34.191		58.1205		40.1403		42.6424
58.0175										37.148		31.8952				56.2326						59.1806		41.5101		54.6204		30.3223				32.7969				30.9394		55.8728		46.6703		35.8975		50.584		44.7315		46.5783
51.7349										16.2251		32.2323				40.1856						54.3302		39.9829		50.7373		33.4808				30.0925				28.2446		54.9031		48.3717		35.8875		58.1359		39.0355		46.4366
57.1737										17.4749		32.8455				51.2127						56.0622		40.2687		48.698		32.5124				34.3855				23.1489		53.6208		49.0846		34.4171		53.6506		40.9588		55.3821
54.6089										32.7732		32.1698				48.0427						58.4378		41.0061		47.2239		34.3521				31.4509				28.5619		52.1207		46.7045		33.4484		52.5369		41.8943		41.2342
53.7359										36.1312		31.1388				48.5087						55.6577		40.3617		47.3304		32.4628				35.3325				26.0377		53.4865		50.3378		34.186		55.607		43.4512		41.6398
59.6508										22.675		31.3167				54.4211						57.4595		38.2146		53.0196		35.6166				35.0568				27.9027		52.3879		50.4529		37.5812		59.0895		36.0691		40.7733
50.6751										25.0371		31.3136				40.5839						54.001		40.0331		45.3713		30.3858				33.9481				25.7978		53.2323		51.1111		35.7254		57.3675		34.929		41.779
53.3086										16.2815		32.6947				43.9648						54.3423		38.2187		52.801		32.0582				35.7593				30.3091		52.7431		47.2044		35.692		55.0573		35.7385		54.6076
53.9488										32.3384		32.6395				44.1834						59.8759		39.8603		50.7753		38.9206				35.2229				33.2428		52.1574		48.9081		37.7889		52.1857		37.2634		53.0489
51.8693										28.8733		32.1369				56.2061						57.6357		41.3533		45.9384		39.6124				34.2874				26.2346		53.5524		47.5219		36.5652		53.2863		38.5687		45.648
50.204										33.5533		31.483				58.4372						54.0307		40.6361		47.5138		31.1131				30.1202				24.7736		54.5247		50.034		36.0911		54.1199		41.7836		49.5917
51.1443										25.234		31.3019				59.9551						59.2258		38.6032		47.6012		34.193				34.9138				29.6547		54.4564		48.9731		37.6335		55.7148		40.5049		41.5615
57.5732										19.1709		32.0347				51.2536						57.5		41.0052		45.1453		31.0642				34.1253				26.1406		54.1951		46.2173		37.7889		54.1516		38.9977		38.5602
53.765										44.7726		32.7968				44.5881						58.7775		40.9455		50.2101		38.7623				34.8677				30.1586		52.3507		48.2938		33.874		55.8448		43.2711		45.9328
56.6338										24.4219		32.0788				58.6821						56.105		40.7963		51.4625		38.2596				33.3909				28.2036		55.0299		49.4073		37.1943		55.0947		38.6776		34.3312
59.315										23.5704		32.6232				41.9941						58.3806		39.1148		49.2124		38.3112				32.3343				25.6948		52.8675		48.9139		34.4625		57.5832		38.1952		52.8577
56.3598										27.7819		31.0425				45.2877						54.5434		38.5244		54.1031		30.6948				34.4659				30.0368		52.5917		47.7085		37.8523		53.4938		42.2337		34.8537
58.8744										32.9083		32.4895				56.8644						59.8785		39.5063		53.5763		38.8318				35.2726				24.6541		55.5905		49.0351		35.6696		51.6153		42.3226		52.5997
52.3966										23.7992		31.7363				48.7353						59.5157		39.0495		48.5642		34.4031				34.3052				23.1284		52.4912		47.3241		37.6325		55.0546		36.4492		46.8484
58.3745										33.3971		32.1532				57.568						57.496		41.4486		54.2007		38.7668				30.2951				28.4955		53.5226		49.3765		35.3865		59.9716		36.3744		53.5086
53.9418										18.3187		32.8615				40.5527						58.4214		38.0308		48.5569		35.7373				33.0574				25.5146		52.6101		49.4222		36.2279		58.35		37.5731		47.7925
56.555										32.5797		31.1387				42.4331						56.6097		38.6328		48.1601		36.8863				34.0369				27.6081		54.1813		51.5797		35.5717		56.8026		42.4848		48.0467
59.99										35.2583		31.3066				42.0951						55.23		38.3351		48.5969		35.9635				35.0146				30.2899		55.9938		51.335		36.6735		50.6203		43.8816		38.5325
52.7016										37.994		31.2093				49.4577						55.334		38.5004		50.4271		33.1799				34.097				28.8831		53.1204		50.5685		34.3017		52.0375		39.7923		52.5848
50.6174										20.3169		31.0823				57.8698						59.6985		40.1335		46.2481		30.122				31.2014				25.1716		55.7606		50.0234		35.9924		57.9562		39.611		51.2462
57.6825										25.1781		32.7315				42.5347						58.0654		40.3889		50.8958		34.3931				34.1891				31.7424		54.4144		48.4067		36.8353		50.3908		39.1848		39.0991
55.0677										35.7203		31.7889				51.0267						55.9254		38.0345		46.2777		39.0111				34.1281				25.6597		54.8816		50.6802		34.6916		52.9175		43.542		53.6981
58.5116										44.0919		31.158				42.9105						56.4535		40.938		53.3399		30.387				33.1664				28.1436		54.2364		46.5368		35.4772		58.7458		40.491		34.3332
53.4422										21.4559		31.3967				56.4089						54.5085		38.3449		46.4482		34.5069				33.3486				30.0289		52.7488		48.6007		37.0049		56.7318		44.6683		53.25
53.9565										39.2164		32.1532				56.2229						59.9691		38.0367		50.263		36.4622				33.1794				26.4364		52.7242		48.1884		33.9459		54.1104		42.4339		48.4273
58.7753										24.6067		31.1302				58.4111						56.8785		39.9555		50.1126		32.7467				35.3274				29.1526		54.8535		51.9503		33.6333		50.687		42.4895		36.8679
56.2805										28.8024		31.2001				40.2504						59.141		40.0264		53.5029		33.8883				35.0705				25.3407		54.3257		51.4535		33.6547		52.5088		40.6707		46.311
54.0194										46.3512		32.9301				53.8292						59.9399		39.0535		50.875		37.6749				32.04				29.1627		52.0925		48.3992		35.0059		57.7837		41.4316		48.199
55.0192										47.1603		31.0296				47.9902						57.0451		38.6381		51.7499		38.2466				33.9801				23.2179		53.7422		50.3884		33.6131		52.8716		42.7415		37.7863
58.1595										36.7826		31.2796				56.1924						56.2174		41.5131		54.7365		37.0474				31.2548				27.9307		53.0795		49.8946		36.1237		52.8895		35.6199		50.2739
58.0365										34.7466		32.1724				53.8611						56.7542		38.801		46.9096		34.6906				33.5217				31.2523		55.3265		50.221		35.1509		58.2266		39.1791		39.0187
55.3881										20.3635		32.2622				51.6491						58.1686		39.0957		52.5408		33.4262				30.9179				26.5482		53.4123		46.9395		35.0963		57.9329		39.8988		54.7306
51.97										17.4182		32.8623				52.2426						56.4086		39.5321		50.4749		32.8181				33.6633				30.991		54.0463		47.6584		37.957		52.5719		34.5151		36.0735
50.807										28.4083		32.1783				54.1171						57.7004		39.285		54.9452		36.0732				30.2114				30.875		54.8118		50.6367		36.8896		58.5346		41.4026		52.0557
50.0412										27.2099		32.1518				48.9294						57.3927		40.2081		54.517		35.0567				30.9738				33.0516		55.5562		46.7794		36.9706		51.8642		35.9912		35.9957
50.8316										26.4507		31.2035				56.5014						54.9338		38.7019		45.6511		37.997				30.7385				30.679		52.7629		49.0941		37.5571		52.9415		43.783		42.7905
52.9142										19.7895		32.4708				46.0503						59.4662		38.3591		51.0623		38.94				30.5578				31.923		53.8587		51.2298		37.2542		57.2839		38.8624		38.47
53.9344										20.0976		31.4414				42.2438						59.6141		38.5802		46.3819		39.3479				30.5276				26.2498		54.2231		49.9344		37.7861		50.1777		40.5552		42.2628
59.2043										29.4013		32.4576				45.861						54.7496		40.387		52.1161		36.6983				34.5227				29.5011		52.4909		46.4072		35.5085		53.4949		35.5373		48.0217
56.1132										33.031		31.2815				47.2983						59.8939		41.0331		53.3514		32.1042				34.641				32.9384		53.3829		48.0062		37.0366		50.9658		40.3928		37.3113
54.2411										37.0973		32.7459				58.9918						54.5842		40.1021		47.9881		30.2463				35.208				25.1527		52.8842		51.2916		33.7907		55.9952		37.9023		34.6021
51.7186										20.8062		31.2355				55.8671						55.0975		41.6503		52.4604		34.0861				33.8336				29.9717		53.5264		48.0064		36.1235		52.5135		43.8289		43.8065
50.5882										45.3658		31.3853				58.7964						55.243		41.1577		48.2778		34.9571				31.0109				30.6292		52.3629		51.1781		37.3043		59.3713		35.4229		36.3196
55.7173										38.5494		32.1926				58.6541						59.8362		40.7462		51.8933		36.2055				34.699				28.8703		53.0301		48.2364		35.7307		53.2111		34.229		39.1336
58.4914										29.509		31.9481				50.7756						58.7067		38.5652		54.6653		30.5316				34.2736				31.5774		52.8189		51.6761		34.6877		50.0316		38.0469		51.7912
59.7639										19.525		31.7954				54.8324						59.223		40.2812		46.6054		34.8223				35.4283				32.8682		53.8954		47.6733		37.7831		55.319		42.9117		34.9125
59.8084										34.8992		32.5216				49.8894						57.2578		39.9095		45.3757		38.7615				33.26				30.9688		52.1691		48.4826		36.3286		50.5095		39.9496		43.3476
53.0512										32.3029		32.8633				57.2122						58.0089		41.1589		53.9779		39.1967				35.9513				25.1231		52.5421		47.5104		35.0734		54.2456		42.0228		37.9635
50.4661										36.6327		31.4681				57.5561						58.617		38.3173		50.6805		37.5325				33.5938				31.0835		53.9992		49.5437		35.4622		50.3742		39.3118		55.2437
54.7801										30.0166		32.8392				54.1792						58.0423		40.8649		53.0349		36.8237				34.7535				23.8715		53.4438		50.2983		36.2685		50.5895		37.3396		37.5667
50.7216										29.8764		32.3501				47.0385						57.3587		39.2797		53.8219		39.3895				34.7701				28.2588		52.3358		51.8033		37.9902		55.6433		42.1776		44.7355
50.603										18.4146		31.9625				44.4922						54.5202		41.6423		46.6822		33.5566				34.8551				30.5408		53.6932		47.1217		33.914		52.0412		44.2066		48.2528
56.5047										40.7213		32.3146				49.3744						58.4544		39.0685		54.7082		35.7784				31.4306				29.083		55.8602		46.8396		37.9839		52.5635		39.497		53.9006
56.3344										25.4649		31.7157				55.1319						59.9944		39.48		50.8737		32.5016				34.9837				27.3142		53.6769		51.0172		34.7721		53.5753		37.7378		35.9954
52.2152										37.2339		31.1625				51.5044						58.1068		41.4301		46.3796		37.0525				32.916				24.4988		55.3317		46.4987		37.8659		56.42		40.6392		47.1374
50.3323										45.2786		31.4013				49.3933						56.2324		41.8791		54.7749		39.7306				33.6146				32.0473		53.5143		49.8408		37.4733		50.419		41.3887		37.5591
57.4678										46.8988		31.0205				40.3763						56.1066		38.8471		48.6269		34.1294				31.1892				31.513		53.4346		48.3419		37.1922		59.7829		42.8542		51.1089
52.2618										44.1222		31.0161				48.0027						58.9499		40.223		54.6638		39.0107				35.4031				26.1197		55.9129		50.5998		35.4867		57.7078		38.2628		49.7149
53.8644										43.3929		31.9898				45.5055						59.3996		39.955		45.3934		36.2535				34.0198				29.2633		52.874		50.0806		34.0875		57.7649		38.2669		46.0061
51.5873										43.0942		31.6251				41.2625						55.2348		39.9541		47.727		36.3213				31.6349				26.4353		55.564		50.4734		34.577		58.3387		38.0851		52.188
51.267										42.2336		31.0602				50.8319						59.9934		41.2839		47.9818		32.9238				30.321				25.4844		55.8114		50.1132		37.9543		51.0752		36.4668		51.0974
52.011										20.4641		31.467				49.0997						57.813		41.6158		53.4956		32.4417				33.7404				29.4324		53.3974		49.62		37.731		52.5706		44.7083		40.7436
55.8607										38.4096		31.1794				58.968						57.6729		39.013		47.9169		35.4838				31.0856				30.8876		55.2985		49.9672		33.3993		52.4089		37.6489		46.9227
51.4636										20.7769		32.3103				59.886						55.4731		41.6763		49.4386		30.6614				32.8045				26.0071		52.5825		49.2882		37.7022		59.3874		34.0465		37.8203
57.6696										40.69		31.3316				40.4566						57.9989		39.8511		50.3335		38.5327				30.5575				32.1606		52.5662		46.439		34.8775		51.2055		37.5907		41.1255
59.2287										35.9382		31.948				52.2584						54.8282		38.5422		45.3017		34.877				35.3926				32.1106		53.483		48.71		36.152		58.7651		42.0251		37.8927
59.7826										38.4246		31.5681				45.4028						55.4763		40.5877		50.1497		30.7964				30.1396				23.3426		52.5566		50.0016		35.8204		54.9133		40.3103		54.4116
57.0899										22.7739		32.9116				43.564						56.6528		39.7926		54.8206		37.0774				35.16				23.7779		55.0848		50.1213		36.9786		59.3033		41.3696		52.7041
50.7886										37.9786		32.4812				47.1259						55.2923		40.6011		45.9049		39.8556				35.9983				25.1443		55.7152		51.1529		34.1547		59.9177		43.9514		43.2223
56.1252										23.6392		32.485				52.1392						54.2287		40.1447		48.5351		38.123				34.602				24.3759		52.6943		50.5853		37.8523		54.5032		38.2844		41.4139
54.5487										47.473		32.6089				43.7304						56.6102		39.1674		50.3477		32.4053				35.7776				31.456		54.9035		49.7028		37.9453		58.7341		35.1159		55.8554
59.0365										20.194		31.7776				48.888						55.6542		41.5814		45.9851		31.4401				35.1954				29.2461		55.0184		47.0881		35.0322		52.3547		35.4091		49.2187
50.1535										37.07		31.9226				51.3177						57.1569		40.44		51.3926		31.9499				34.8386				29.0164		52.1003		51.461		34.9732		50.6722		38.1589		54.5076
54.6968										38.4954		32.5311				55.6471						59.7194		41.2695		52.021		39.0605				35.833				33.3891		55.8955		46.2985		37.1701		56.8113		35.3548		39.4144
56.7307										38.9608		32.6354				40.6574						59.2481		40.1393		48.3058		37.0329				34.4469				25.1071		52.9232		46.7192		36.4168		53.6812		34.9854		45.4843
57.8223										20.0413		31.2371				45.6174						58.6731		39.4551		45.2179		30.1996				31.0374				33.8712		52.5197		49.862		36.2925		57.3604		38.0802		43.2664
51.3134										35.2501		32.4101				56.8881						57.9909		38.6195		45.8575		36.3221				32.5559				23.6267		55.5935		50.1372		36.1658		58.8127		35.6167		49.9865
55.0142										20.3419		32.7955				43.5162						57.1876		41.5481		52.1423		38.6376				31.8225				30.8267		55.9414		51.7193		33.5549		55.6518		36.7276		47.8052
54.4477										24.6164		32.4937				42.9215						56.5088		40.6797		53.3162		32.7214				31.1265				31.4236		55.7093		46.7413		34.757		50.7226		40.7108		51.2011
58.8764										46.9562		31.2073				40.0496						56.1475		40.5244		46.0464		30.2507				32.1565				33.6978		53.7285		46.5824		35.252		53.1292		38.1717		45.0755
52.605										27.4848		32.9395				40.1618						56.6762		40.9385		50.0825		39.4294				30.563				30.2685		55.6725		49.6384		36.4944		51.8936		35.555		39.2003
55.3419										32.6549		32.4335				49.8105						54.3886		38.5332		50.8355		36.3961				34.4317				26.7705		55.6687		46.1825		35.1033		56.1888		36.8105		44.4267
59.8245										37.4775		31.7353				45.3511						54.0514		40.7636		49.8978		33.5059				31.4895				29.3532		52.4989		51.1991		33.6586		50.297		35.7072		37.7039
57.4716										25.9174		31.234				55.3056						58.1018		40.8499		54.6617		36.0465				35.8332				30.0537		53.5311		48.3905		34.7919		54.3784		34.2306		55.8467
51.3396										28.698		31.8244				53.0952						57.3572		40.6842		46.4666		39.5695				32.2963				27.7266		55.858		49.3392		33.7443		55.4678		39.5578		39.0519
54.9387										17.5726		32.2828				40.4054						57.1471		38.4696		49.6064		35.3208				32.6054				24.0054		55.3715		51.0614		36.0797		51.3005		35.6048		36.1382
53.1862										31.3497		31.4707				53.7037						56.3465		40.2439		50.1645		30.8096				34.6815				30.2978		52.2071		50.9632		34.0989		51.2983		34.1031		55.2809
50.2976										41.1056		32.6932				47.6406						54.8661		41.4265		53.9557		37.7564				32.5913				29.916		52.4555		50.4037		33.5497		58.3571		44.1846		51.8406
58.4881										26.4313		31.3792				54.0319						54.1512		40.6488		47.963		33.7906				34.9095				27.3751		54.1791		48.19		37.3191		52.6338		38.8471		48.8103
55.5541										41.0076		32.8686				41.2367						59.6395		41.9671		49.4548		37.2212				34.4569				27.7573		52.6238		47.0408		36.2778		55.3192		39.4004		44.4749
59.1798										29.2197		31.0341				54.1612						54.9637		39.2825		54.2445		37.6676				35.142				31.7307		54.4517		49.1107		35.3057		57.9498		43.337		50.7571
53.9274										33.6077		32.9858				42.2953						54.7552		38.6913		45.6113		37.9528				32.0026				30.5704		52.3464		48.3153		36.2395		55.5801		42.6705		49.5894
54.9843										32.0627		31.7959				51.9116						59.1133		39.8083		48.5686		36.8417				34.2779				33.2348		52.146		46.9856		33.8378		51.9712		40.877		37.7705
50.8851										25.5927		32.1341				57.7131						56.0865		41.5802		46.2414		32.5023				32.3908				27.6392		54.5531		49.7956		35.6863		59.2643		41.125		40.5358
56.0731										34.8066		31.2827				56.6152						55.7588		39.1912		50.8304		38.8508				32.8666				31.2339		53.422		50.2784		34.4966		59.6209		39.3873		46.5906
53.8448										17.1736		32.8982				58.9253						57.8091		40.939		49.1505		39.9202				32.1492				25.6235		55.1197		49.7263		36.2812		50.2859		35.589		44.2388
50.6564										40.6802		32.7327				45.7292						56.6641		39.574		45.0344		39.7131				32.1937				27.4046		55.0858		47.8495		33.3695		51.0293		39.9228		48.1632
55.4762										45.7357		32.8815				49.7433						59.3587		38.1464		49.8511		36.2851				33.4591				29.2788		55.6946		51.8594		37.7353		53.8611		44.5595		51.4381
56.1136										43.6882		31.2061				52.0746						57.8148		40.6421		54.1042		32.7892				32.1922				31.0004		55.6532		48.0342		35.5661		53.2523		44.9798		37.1712
55.9822										21.8168		32.0019				53.8203						54.4499		41.1165		52.0882		37.6592				30.1008				28.2831		55.8106		48.3728		34.9028		52.9853		40.706		51.7368
56.2232										24.3823		31.8408				42.3869						57.0354		39.3787		46.7957		37.7839				33.2356				26.2093		52.1324		50.3072		37.6368		59.2607		44.5551		54.4154
52.0966										16.6374		31.7907				41.9699						59.7423		38.2697		48.8599		36.6016				33.7253				26.4192		53.2275		47.4139		35.3595		54.2599		38.7562		54.2416
58.4477										40.5953		32.6241				44.9645						55.6648		41.607		52.817		33.5824				32.0709				31.2195		52.031		49.8443		35.5128		52.813		43.5923		47.087
51.5114										38.9558		31.009				45.8582						56.8686		40.0562		52.6025		34.4034				32.1148				23.7759		53.6834		46.3348		33.3981		57.2315		40.7596		46.2574
52.6275										40.733		31.8515				50.4488						56.0768		41.9446		47.069		30.2922				31.6397				28.2484		53.7993		47.0064		37.5079		55.7028		43.2745		46.9568
54.5456										37.3419		32.5212				51.92						59.3394		40.5499		46.4499		37.3824				35.5787				25.1388		52.4841		46.851		33.7792		51.107		35.5689		52.1423
52.3591										36.018		32.5066				42.8656						59.5803		38.3457		45.5608		34.0418				32.3938				33.6335		54.7388		46.3581		34.5893		57.605		43.2671		45.7112
50.9747										19.6406		31.1153				44.5017						54.0449		41.6152		48.5579		31.9893				30.0993				32.7258		52.4816		50.9016		37.8364		50.1048		37.4742		45.7588
58.8115										35.969		31.9859				59.1442						59.0587		41.3442		54.8047		32.093				32.7187				33.628		53.2105		48.4788		34.7554		54.5107		41.5025		45.6955
56.3325										37.8481		32.2403				42.474						59.3448		41.8074		49.1904		31.1883				34.1334				33.3152		53.8282		51.5889		36.1969		51.1874		37.8207		34.2994
56.3468										41.9512		32.4776				57.6986						57.0573		40.3335		48.4451		38.1244				31.3501				28.0201		55.1184		49.527		33.316		57.2342		34.6701		48.9452
55.396										33.7586		32.4977				43.6868						59.4342		39.0575		46.6028		33.8952				32.3972				28.4883		52.7068		51.8579		33.7275		58.9988		44.285		36.4121
50.5268										39.1813		31.1795				43.2053						55.5577		38.7428		47.5777		35.6308				35.2162				29.2143		55.0385		48.6946		36.0443		50.1507		38.5176		50.2837
50.0142										37.9371		31.8368				44.5829						55.2624		39.1956		48.4855		36.7483				31.7073				30.8834		52.2638		49.7046		37.9629		53.4573		37.5132		55.2424
51.553										20.3344		31.3373				56.1474						57.2772		39.9814		51.6612		39.1568				32.4948				24.1801		55.8974		46.9408		37.0387		54.6072		35.0889		52.5831
59.4637										23.671		32.841				59.245						59.6166		41.6259		45.0483		33.5818				34.0296				29.7575		55.5221		51.8907		34.0912		50.8482		38.7447		52.8402
50.6762										35.7565		31.6475				57.9113						54.2524		38.585		47.4449		34.113				35.1861				29.9613		54.4437		49.2072		37.5022		52.3937		35.2762		36.7125
53.374										23.0189		31.1988				57.6102						54.4776		38.059		48.646		38.9338				32.3469				26.3905		54.2231		48.8444		36.2932		56.5609		44.4125		38.3888
53.9371										41.1147		31.857				53.022						59.4238		39.1544		45.7376		39.4691				30.4082				28.5072		54.6049		51.1758		36.4723		51.7069		41.5343		54.664
53.9935										23.9191		31.0767				53.5836						56.754		39.764		49.1984		35.0407				33.0477				23.4092		55.5948		48.886		33.2771		56.9469		41.6291		51.0583
53.3099										22.0074		31.6371				41.1681						59.3356		40.9826		53.1033		39.1023				34.9067				25.9586		52.2187		51.6085		34.6105		56.6886		38.8364		54.0816
50.5038										16.9404		31.6752				41.2884						57.5324		41.9147		54.9808		37.6882				35.1111				33.5562		54.3824		50.9201		34.6694		52.476		41.2631		44.4919
56.6769										43.6127		32.204				40.0709						55.7277		40.9686		47.3522		35.2265				33.0899				24.9764		55.2558		51.0422		37.9566		55.9169		36.1025		48.3802
56.2008										27.8857		31.2003				41.1584						56.986		40.4578		47.7588		31.857				33.5302				33.7573		54.762		49.465		33.2391		59.3404		37.0042		40.4171
51.903										20.5385		31.6856				47.9198						55.1434		40.7005		46.0143		33.2221				32.5564				26.519		55.2974		48.5417		33.7088		55.066		35.1628		38.4936
59.715										47.7015		31.6553				57.1312						54.1146		40.837		45.3188		33.6122				32.4236				26.6414		54.9336		48.712		33.4041		58.542		42.0597		48.2912
56.9521										29.976		32.5448				50.3999						58.887		41.9457		51.5232		36.8301				30.819				32.6911		53.2542		50.5474		35.2545		55.9613		38.0467		43.648
53.1966										22.7529		31.4884				45.7214						59.3944		39.5803		54.5837		39.1173				33.072				31.8367		52.8124		50.0458		34.5532		56.5562		36.3236		41.1183
52.6991										46.3681		32.6737				41.0343						59.9305		39.3632		50.0036		32.2754				33.7979				32.3414		52.8476		49.1926		37.3392		54.4795		35.6351		39.0562
52.7425										43.8169		32.2534				50.4052						55.1471		40.1557		48.8967		31.1133				33.3424				27.7545		54.1987		46.4305		34.6172		55.1568		41.9019		47.9099
51.4849										39.0697		32.751				55.7876						55.6415		41.5061		51.2794		37.2377				35.7814				27.8709		54.3389		47.6025		34.3687		51.6351		43.9786		55.5611
53.6396										35.4487		31.9671				55.0972						59.5893		40.9538		45.2768		36.0521				30.0719				32.4545		54.7005		50.8856		33.4863		51.8103		42.1108		37.1938
57.1327										32.4759		32.0937				50.7493						57.5872		38.8397		52.9184		31.3383				33.732				23.1685		52.5497		46.2786		36.352		51.4535		35.6548		54.4793
53.4571										36.8325		31.0089				41.9998						54.1961		38.4462		47.1542		32.8545				33.8704				26.2295		55.1243		51.8348		33.9422		50.1913		43.3208		51.8349
59.126										31.5339		31.6505				46.6916						57.7236		39.7157		52.9065		33.7588				33.0358				30.606		55.7862		47.9379		34.2801		52.932		36.9254		36.2078
52.7116										21.3558		32.8177				51.4745						59.2267		39.9932		45.9501		36.1497				30.6706				32.1305		53.8684		46.4571		36.5271		55.178		43.8972		54.2614
52.1984										40.0575		31.6312				59.6884						54.6814		38.9169		49.6614		34.7562				32.4618				28.1339		53.8328		50.2022		36.2207		51.0072		42.2947		40.1429
55.218										16.1437		31.603				57.2587						56.3425		41.285		53.9622		35.6014				31.1471				23.15		55.0965		50.8998		33.9066		50.4743		44.2621		38.9017
58.1817										21.3446		32.345				40.4094						58.0999		39.2294		47.363		32.1783				35.3931				33.2729		52.0095		49.1764		34.9283		53.1304		40.8807		48.2148
57.7315										40.338		31.3603				47.4351						57.5219		39.1795		48.7943		39.4306				34.6589				30.7915		52.5952		46.3839		37.6084		52.847		44.0257		40.9144
56.089										23.4543		32.17				57.2379						56.2334		41.4699		54.5807		34.3091				30.3656				31.9416		54.7035		48.9846		35.7161		54.1748		44.1947		38.6783
53.5249										23.7274		31.7408				51.5519						54.679		39.9233		49.0709		39.1624				32.6513				32.6609		53.8081		51.4432		33.8842		52.0232		37.2503		48.9662
52.3206										16.2103		32.6198				42.7352						55.5287		41.2818		48.5402		35.2589				30.1593				28.3332		53.7495		51.8381		36.1072		54.3901		44.6334		34.7494
53.6723										37.7631		31.4599				41.6862						56.0763		40.3955		52.1066		31.4921				35.0114				29.5594		54.1359		48.7239		34.831		50.6762		37.462		55.5078
54.5771										44.2281		31.623				43.1094						59.0962		41.6431		45.9672		30.1341				34.2178				27.1647		53.8593		50.8875		35.4335		52.0166		34.7191		52.9213
56.8605										20.083		32.1092				45.3243						59.7491		39.0069		46.8159		39.697				34.8812				25.0212		52.1432		51.7061		33.2846		54.4305		41.3366		34.3193
58.3833										18.2813		31.2108				41.286						55.4989		39.9649		51.3181		34.3712				31.4116				28.2125		52.8537		47.255		35.1557		53.1534		35.9245		36.895
58.0229										23.3934		32.0434				59.3923						57.4587		41.8982		50.1791		34.1421				31.2989				32.9608		54.6586		49.2535		33.8326		56.0662		42.3301		39.3638
50.4928										32.5013		32.4412				42.0324						58.7667		41.1405		53.3856		34.699				30.873				25.4471		53.0491		46.2354		36.3004		58.2339		36.5484		41.9245
57.3234										22.2009		32.6751				43.1556						56.7105		38.7984		50.8024		35.4067				31.166				32.614		55.5003		49.8169		36.4233		54.7922		36.5889		54.1384
53.4497										35.5776		31.6163				59.9072						56.2121		41.8581		49.7698		36.0543				35.2137				28.5901		52.702		49.3869		35.8508		54.4647		44.1072		49.2485
51.9978										47.0656		31.1234				44.5343						59.5613		38.5856		49.08		30.752				31.094				32.3619		52.2169		47.6933		33.4798		50.0622		35.7185		42.2134
55										32.625		31.6569				48.0221						55.9585		41.4073		54.1993		32.0853				32.7348				28.0515		53.3706		46.1558		36.3511		53.4743		35.8986		36.8456
51.0405										27.9462		32.5725				50.0286						55.9246		41.7696		45.5455		38.1575				31.7286				29.2705		53.7342		48.563		35.3566		57.46		42.5633		36.6783
58.7812										42.2169		31.2781				57.6689						55.0069		39.1726		50.9132		34.7942				34.236				29.7254		52.9379		51.8348		33.9775		54.0841		34.42		50.7122
53.6737										36.5445		32.3574				47.2961						58.3652		39.8726		46.0541		34.5339				34.4678				23.8859		54.7993		50.8816		34.453		56.5418		37.7001		52.1133
51.7093										37.6096		31.002				41.2662						56.7804		40.2605		54.6793		31.8935				35.7206				24.1892		53.9216		46.2921		36.9805		55.0876		44.6642		40.8353
59.1132										23.0519		32.7787				54.612						54.3452		38.8203		47.7782		38.3292				32.3579				27.3823		54.6972		48.4042		35.2484		50.717		44.4881		43.7112
58.2844										43.978		31.9567				48.8376						59.6223		39.3613		48.8917		34.7613				32.7095				31.2944		55.5237		51.1672		33.3009		54.4128		37.406		48.6334
51.1336										41.3331		31.3038				47.6209						56.1142		38.3738		50.7379		36.9152				30.7405				23.3112		53.6998		50.7618		37.6276		57.4748		41.5244		40.0162
57.0262										22.8193		32.272				45.8688						54.1869		38.7997		45.9376		37.4659				35.0083				27.7119		53.2267		46.5439		35.4117		51.6197		35.2615		42.9419
58.2851										31.9446		32.7005				47.59						59.9215		41.2387		46.696		39.5751				34.2835				32.8368		54.5161		51.3687		34.471		58.5917		39.9744		35.7081
58.9111										23.3071		31.056				56.15						58.31		39.4049		53.5373		32.1246				34.9859				23.6867		55.6761		49.3183		37.5667		56.9288		42.878		38.7897
55.0426										21.3233		31.7317				53.6564						57.4615		38.8163		53.229		31.1366				30.6758				30.9852		55.1501		48.867		37.578		56.6323		42.9353		38.572
53.1829										23.1859		32.3757				52.6918						58.1528		39.9238		53.0926		30.743				35.1255				24.7622		54.0363		49.9589		36.5097		52.9472		38.8198		49.0876
55.8502										18.9703		32.7652				48.1371						58.4316		38.4112		50.2467		37.0656				30.9801				30.2638		55.4479		49.347		37.7154		58.3235		39.2998		39.1359
53.5328										37.2538		31.0349				53.7839						56.9301		39.4983		53.9524		33.2638				31.782				29.7352		53.3422		48.0956		34.125		52.8551		43.2365		36.1812
55.8511										22.0267		31.3343				54.7057						58.3287		41.6642		54.885		35.4669				34.0199				32.5334		52.7988		47.2084		37.0203		53.8278		38.0484		41.0012
52.9845										28.0991		31.362				44.0292						57.2194		38.7956		51.7333		33.3859				34.5793				27.1074		53.8553		48.2966		35.1805		51.2737		39.3438		49.5055
56.0008										34.3828		32.703				43.5842						54.6814		39.9002		54.8238		32.9014				35.4656				31.8989		53.1294		48.3774		36.4527		58.9467		40.2228		42.3626
55.9495										34.3698		32.4646				41.2849						56.5109		41.2415		48.3129		37.8094				31.4902				27.2546		54.1224		50.9799		37.8835		51.5367		34.1048		42.9955
59.5715										36.8756		31.6923				49.0604						55.7452		41.3368		47.3476		39.0687				30.0581				29.6648		55.6651		48.4166		36.9415		56.5109		36.9507		53.7095
51.7869										33.1632		31.5135				55.8023						59.2344		38.6021		52.6033		32.1564				30.8616				31.2074		53.474		50.7064		36.9499		53.4908		35.6096		47.3018
59.5244										33.3501		31.8915				56.5775						58.5131		40.4243		46.0753		34.1567				30.9914				32.5377		55.955		49.3034		37.244		55.97		40.2451		47.6605
55.5717										30.2124		32.8547				57.2193						59.5438		41.4854		47.0099		38.3687				31.9142				30.9326		54.9079		48.9409		34.8967		55.159		34.7265		38.8135
53.9504										42.8661		32.0759				47.8279						55.5363		39.8228		50.8477		37.3954				33.0127				28.7735		54.5666		51.201		36.4163		50.0897		42.3773		42.8546
56.0202										38.6472		32.1794				52.7519						57.0126		40.2811		49.9876		34.983				32.3612				32.4118		52.6882		49.3467		37.8067		53.1093		39.765		35.029
54.0803										31.7942		32.8202				43.377						56.6788		41.1243		49.5389		36.1111				34.9358				23.118		55.6318		50.852		37.7193		55.5492		39.4588		44.4013
50.6165										21.4986		31.689				58.8113						55.345		38.6437		53.8936		34.3775				31.9589				26.2087		52.9265		49.8228		35.2134		52.6669		34.0789		48.8043
56.1708										45.1196		31.458				41.0519						57.0894		40.3985		49.9749		38.9584				35.9877				31.4217		53.3324		49.2211		34.5166		59.256		44.9956		53.6595
52.2786										43.6095		32.5998				49.3398						58.0533		41.4648		50.2268		35.2912				33.4585				29.2509		55.8881		49.2329		37.643		53.6897		39.678		41.5978
59.353										26.3157		31.0754				46.1064						59.3456		40.5303		51.6371		37.2696				34.6801				23.399		53.798		50.0259		34.2676		59.7575		42.4772		45.134
54.1775										35.375		32.1748				40.9402						57.8195		39.5571		51.3257		31.3802				31.8246				24.8392		52.2682		47.4229		33.8717		54.4388		36.6154		46.3282
51.6068										27.4032		32.0594				48.8926						58.9791		40.7949		45.001		33.5056				30.5605				31.1073		53.3687		46.4765		34.1459		56.1101		41.2421		53.16
59.1714										25.5958		32.7535				40.0687						58.9037		41.6243		51.4873		34.1701				33.844				30.7497		52.3283		47.3316		34.591		56.6475		44.6891		47.3716
55.8275										17.1371		32.1481				44.4709						58.6492		40.6869		54.8399		31.4947				32.8789				27.0923		54.3871		50.5794		37.1573		59.0921		43.2255		41.3262
55.4008										31.0138		32.6732				56.476						58.9747		38.928		47.067		38.8387				34.9628				27.8427		52.0492		51.6509		35.2943		57.1814		40.2003		54.757
57.3254										37.9651		31.1781				56.8487						59.5504		38.4443		48.9827		38.176				32.3637				24.97		52.926		47.2445		37.1349		54.4745		34.6341		41.5155
50.0594										39.4996		32.369				43.5861						57.7615		39.1735		54.0381		37.2212				33.1721				29.4985		52.9554		48.5112		36.2103		57.3881		38.0596		39.3009
54.8368										33.2362		32.0047				58.1217						57.2574		38.0786		46.8418		38.4557				34.5585				25.5797		53.2594		47.5804		35.2079		55.985		41.8947		34.6159
53.5217										26.6867		32.9121				51.8444						58.8939		38.9529		45.3561		37.3141				30.6592				28.7173		55.349		50.605		34.8932		53.3772		43.218		46.2215
52.7109										41.1769		32.756				41.3828						57.6907		40.0451		52.4627		36.2265				30.9674				30.4908		54.7684		49.1882		37.3206		52.1399		39.8076		39.2399
54.3971										45.8511		31.1532				57.5725						58.4826		41.4379		51.2387		35.5661				31.8491				23.1551		53.2878		50.434		36.3546		51.4226		44.3544		52.2737
58.689										32.8321		31.0053				45.0952						55.4591		40.8373		47.2059		36.3711				33.0734				26.8068		54.8434		47.6775		35.4175		51.3578		39.1383		42.9393
57.6383										41.2963		31.737				49.4316						56.0209		41.4293		54.0766		33.3241				31.8011				27.5661		54.3437		48.9327		34.4195		52.415		43.2058		55.2919
53.4307										39.1879		31.7641				52.7013						59.4348		40.4565		54.7364		33.364				33.3231				31.0456		55.6843		50.1655		33.5152		58.069		43.5796		42.486
53.7735										32.7119		32.791				48.6893						55.2101		38.1611		53.1377		39.2407				32.5596				27.8288		55.831		48.5491		37.194		52.6139		44.8377		34.09
53.0422										34.9913		31.5243				48.34						54.6563		41.3171		54.8188		37.9714				35.7606				31.9934		55.7803		46.631		37.3935		59.7942		34.3052		53.1054
53.6424										37.355		31.4803				41.0457						55.6996		40.9993		51.9708		34.5768				34.6694				26.2729		52.6055		51.1963		35.6841		54.6484		37.8485		46.5958
51.7413										41.1353		31.3644				57.6768						58.791		40.8309		53.0686		31.0097				31.3904				25.0394		52.8423		48.643		34.7079		50.4904		39.7346		37.6421
58.2191										25.0809		31.3014				41.9671						56.2164		40.8854		52.291		39.2448				32.1444				28.0321		54.3212		51.2221		36.8329		56.6845		34.1298		35.0587
55.4089										41.8035		31.6468				51.5444						59.8278		40.4423		51.9949		38.1486				35.3365				27.3313		54.7811		51.2927		37.37		52.3592		36.3368		38.7599
54.0113										36.3275		31.697				49.8902						57.9773		40.6493		45.1021		35.9602				34.355				31.905		53.6577		47.2673		36.5448		54.0195		40.0755		38.0711
59.1016										39.375		32.8885				58.8412						54.1979		40.5936		46.3071		37.1168				35.3301				31.4406		54.7214		51.4374		34.1375		52.4894		41.2006		39.1415
54.0691										35.1876		32.6021				59.4663						56.0768		38.5295		48.6285		39.9498				30.0603				25.46		54.5		49.7822		36.7362		54.8817		43.6287		42.2664
55.3953										43.0144		31.7508				51.2078						59.1098		38.5931		51.9666		36.9436				31.6652				26.7401		53.6589		49.9258		33.4273		52.8403		38.7938		40.6594
57.345										37.9609		32.8894				49.2614						58.8095		39.5529		51.7852		35.3576				35.1838				24.6022		53.5277		50.3408		34.3849		59.7947		41.0513		52.9992
50.5697										43.1506		31.4394				49.6842						58.3024		40.2063		52.7758		35.7679				31.58				24.1733		55.9237		46.5022		34.4019		51.3801		35.1053		43.1542
56.0057										47.2573		31.9681				46.859						54.2619		39.1121		48.1458		38.0026				35.8638				30.5363		53.1124		50.4918		37.7125		50.1917		42.2584		50.5083
56.0255										42.0628		31.2523				57.4017						58.1044		39.5608		47.2913		39.0749				32.9618				25.6088		55.4349		50.0625		37.4159		50.3896		43.7955		53.2307
51.4572										42.6269		31.2046				48.1841						54.0507		40.6948		52.0871		34.9315				30.347				31.9249		54.8175		48.0245		37.6843		59.9406		44.4558		55.5497
54.4176										44.4605		31.0301				41.8321						55.0369		41.1779		54.4063		34.0975				34.6875				28.8094		53.5331		50.1906		33.7505		54.6121		42.3077		49.0863
55.4985										27.1364		31.4663				49.8944						55.0861		39.8713		49.5919		31.8581				32.6008				32.2055		53.6704		46.0072		37.4675		59.2369		40.628		55.544
58.9197										47.4093		31.8611				58.3992						57.1723		39.1774		47.1828		30.1314				30.1527				23.8867		55.2688		50.5975		33.9223		53.0947		38.6344		54.466
59.6069										34.28		32.1716				52.9434						58.0294		41.3429		53.6375		30.4976				30.1987				31.7463		54.8858		51.9542		36.5192		52.1717		43.7858		50.2827
52.1871										35.0354		31.9479				49.6072						55.7346		38.0949		52.066		32.404				35.3899				30.2236		55.7513		50.37		36.218		51.5242		44.2365		38.1561
59.9628										23.5672		31.0002				45.0845						55.3246		40.458		48.6788		34.837				34.6009				30.536		54.2844		49.5536		36.5144		57.8712		43.2036		42.5782
51.1861										21.997		32.6932				48.6267						54.2213		40.6672		50.0248		37.1957				34.1818				33.3558		55.1397		49.8274		37.7559		52.5038		39.9407		49.2784
58.7349										29.0729		31.1792				58.2428						58.9042		40.3303		46.9834		35.3791				35.7725				32.1883		53.4318		51.5758		34.3155		52.9138		41.4018		44.3944
59.2205										38.2184		31.493				41.0283						54.5365		41.5435		49.8872		32.1143				30.596				30.9973		53.6435		46.967		35.0453		55.3494		35.8867		44.6672
51.3711										46.2605		32.9629				44.9929						55.3287		38.1939		48.792		30.0176				34.4749				28.3383		54.7939		49.837		37.2161		51.5106		34.8148		47.0711
52.8678										27.6578		32.7648				48.3007						58.6526		39.2112		46.5849		39.4659				33.2804				24.095		54.0779		46.0699		37.1336		58.0756		38.194		49.6768
55.2316										33.7249		32.0753				42.1973						54.3829		39.3342		52.824		32.984				34.9332				23.67		55.7196		47.9287		35.5898		58.4859		35.1674		46.6087
57.9929										44.7947		32.6612				48.084						56.4855		41.1133		46.199		32.7179				32.3198				29.2158		54.2399		46.056		35.1847		52.0494		34.0535		44.8566
51.953										26.1447		32.7394				42.5101						59.7194		40.3483		47.5089		39.7863				33.0183				32.3427		55.9284		46.3593		37.0155		50.4611		38.2445		44.477
50.4813										33.4986		32.3488				50.1544						54.2777		40.4815		48.4072		31.4738				32.5187				31.4603		54.8161		46.887		34.3772		57.5917		35.3274		40.901
53.6675										45.3816		32.3912				45.6402						59.4704		41.6815		46.2173		33.1826				35.9394				30.6451		54.6436		49.343		35.5186		50.6228		34.6268		43.7095
54.6131										43.2625		32.5078				57.2502						54.922		38.1024		45.1856		33.5389				35.3382				25.1976		55.396		47.546		33.4303		53.8043		37.174		34.382
51.0797										24.5119		31.2002				59.417						56.3295		40.0919		50.9703		33.3623				31.5546				27.5513		55.2926		46.8364		36.4246		59.8152		40.8301		55.0766
52.373										29.572		31.4776				45.0452						55.4753		40.6873		52.7297		31.4886				31.2425				31.7457		55.37		50.0151		36.3953		56.8334		37.0601		44.1427
59.7812										37.2171		31.2173				58.96						54.2316		40.1234		47.6336		31.2052				33.2464				27.0208		55.0293		47.2435		34.3311		51.8906		36.0777		48.1026
55.974										47.2853		31.865				47.4844						58.1319		38.2262		53.8731		37.3167				32.3277				28.3853		55.1158		49.7565		37.7135		59.7064		41.2509		41.6705
58.1064										18.9808		32.1878				42.2882						54.1285		40.4815		52.2716		32.9736				34.9407				33.5692		53.8261		51.5681		34.0269		55.3376		34.2174		50.9598
52.958										32.4932		32.6863				59.9396						55.0989		40.8959		49.0624		33.2203				30.6965				33.1167		53.8503		46.8911		33.3766		57.2792		39.0621		51.0816
58.0006										27.1071		32.2821				56.6765						56.5685		41.6685		45.6267		36.3594				33.6671				29.7714		55.6387		50.4633		37.2647		54.7242		34.4348		40.992
50.341										27.888		31.1382				44.6868						58.8105		41.5192		53.1321		39.0175				35.7195				31.0112		53.7836		50.5812		33.2353		51.319		41.6878		53.4264
59.7628										43.9036		32.5488				59.9663						55.8877		41.6952		50.2271		36.914				33.2547				29.8883		55.0632		48.1175		37.0212		55.5073		42.9345		50.2814
54.874										41.1589		31.9666				48.9009						58.8394		39.8016		49.4226		39.3067				32.1377				28.9094		54.0159		46.0482		37.2619		50.0892		35.5606		53.0454
54.7397										37.9614		31.1313				45.4197						59.4319		40.6603		52.6844		38.5226				34.8617				24.0625		52.4296		50.494		36.6946		57.0894		40.2359		36.0358
50.0876										22.385		31.7905				49.9926						57.2476		39.5711		46.5221		30.8222				30.4445				28.0352		55.0586		49.7836		35.466		51.2484		34.4274		35.8997
52.2399										32.5588		32.4029				54.7941						55.0747		39.0403		45.0098		39.2097				30.3485				29.7701		54.7566		49.6064		35.0489		53.3132		36.2042		47.4605
53.1124										23.1074		32.968				48.3218						55.7664		38.9118		46.8681		30.2741				34.214				29.5997		55.1673		47.2324		33.4738		57.6852		43.3631		45.495
56.4145										47.4474		31.0256				48.7026						56.5308		39.3877		49.2962		33.6463				31.7454				26.3469		55.3829		48.7227		35.4947		51.5912		41.2724		45.1532
53.7979										16.2347		32.6409				55.0113						57.7989		39.0127		47.1694		35.949				32.7191				28.4364		55.6426		48.3769		36.9802		53.2157		43.6463		55.158
57.8013										19.2057		31.6537				49.6788						55.3588		38.8379		46.1364		37.6818				35.2211				30.75		53.6293		47.664		34.2703		59.1		44.2418		53.8791
51.4919										47.4118		31.2835				42.3555						59.676		39.3879		45.1451		32.6306				35.431				31.638		55.1707		50.583		36.0488		51.3108		44.542		39.8116
50.9325										21.8306		32.3144				58.8478						54.9734		40.0144		47.1057		36.639				33.9741				24.3816		53.1935		51.0922		33.825		53.4933		43.5653		40.1502
57.9193										37.0558		31.446				51.1607						58.0666		39.1835		47.4519		36.0498				32.0257				29.4874		52.9866		49.7507		33.5203		51.5161		41.7488		45.4339
56.4603										17.0455		31.7115				59.8116						55.4666		41.9963		45.1245		35.1754				35.902				25.5629		52.3532		51.5788		36.764		51.4815		34.5058		51.8816
50.5538										16.1353		31.2469				43.7784						59.5802		41.1712		50.0524		37.021				33.2387				24.5626		55.0603		50.0418		34.9058		59.2307		41.348		49.8785
50.99										46.7757		31.9776				56.6961						55.0458		38.0707		46.2892		31.301				33.9633				23.9871		52.5313		48.9541		37.0288		51.7133		38.791		51.7926
55.9844										20.7348		31.2155				57.0153						56.1502		40.9068		48.7451		30.1958				35.9853				31.894		55.9919		49.6652		37.1596		54.4725		43.1269		53.4756
52.5857										35.7348		32.7797				50.2281						59.4602		40.5033		48.2688		32.0992				32.6174				27.1419		55.7333		50.3466		35.4501		54.8374		42.9379		49.9002
51.7909										19.9404		32.9553				45.0146						54.8386		40.8005		45.8317		33.5249				34.7971				26.6363		54.5953		49.7514		37.835		55.8014		35.7326		42.7794
55.2274										33.927		32.721				47.2538						57.0364		41.5041		51.1712		36.7488				32.1411				31.6992		54.999		46.9864		37.0697		59.0197		34.0978		41.4883
58.6718										23.0207		31.8221				44.977						56.3925		39.7374		51.1489		36.9478				32.5622				33.2887		52.4491		49.9223		33.639		57.1266		40.8527		52.0808
56.6348										47.2252		32.0631				43.5639						58.487		40.2229		51.3308		39.8515				30.9991				32.4586		54.3984		51.7498		33.9536		57.7195		35.3174		43.8766
51.558										35.6406		32.4294				42.6092						55.0614		41.8979		53.0159		36.8842				35.473				24.4399		55.803		49.1303		36.6285		52.3541		43.967		40.5924
52.0813										39.9451		32.6538				51.2696						58.2594		38.2585		48.3608		36.0146				30.005				29.8597		53.1644		51.7665		33.9658		58.0871		36.5236		38.2915
52.4275										37.8154		31.4696				41.14						58.9871		41.5055		46.8701		36.7145				32.4877				24.3867		53.8476		49.5651		34.7409		59.4693		35.8886		52.3055
58.3331										46.5836		31.4795				41.6246						57.2113		40.3674		49.8494		37.2633				31.0148				29.1321		52.0688		49.4667		36.145		50.8636		35.2053		39.0212
53.4048										39.4584		31.3425				43.6834						59.8313		40.4961		45.591		39.4478				32.1463				33.4822		53.7452		49.2874		33.9073		51.929		43.9552		46.5451
56.1339										35.258		32.5815				55.0585						57.173		38.5581		46.4777		38.7808				33.7206				25.2357		54.1338		46.5045		37.8419		59.1916		40.6001		38.5547
53.0877										28.8259		32.9738				48.7135						58.3765		41.2226		51.9984		31.9534				34.0757				24.7314		53.4316		46.482		34.8226		51.4352		42.2216		54.5223
54.7366										24.8771		31.6217				59.8857						59.2487		41.2237		50.2681		37.9203				31.3181				29.0241		54.1149		46.4099		34.3816		57.8563		34.6492		38.0333
50.356										31.6015		31.5778				56.0571						55.6112		41.4695		47.7116		39.841				31.38				25.8816		54.582		49.2728		36.3582		56.116		37.7759		55.7199
54.7767										18.5805		31.9266				54.8822						57.5841		39.3758		45.872		35.0308				30.4708				29.27		53.2705		47.3727		35.2242		56.7119		35.631		53.2237
53.7841										25.1875		31.0211				44.6102						54.0695		39.7234		49.0466		32.0599				31.1625				29.5692		55.1268		49.9691		33.3626		58.2367		37.8994		43.0642
50.209										37.45		32.9453				43.1311						55.0028		40.7237		47.2339		38.5246				34.279				32.2625		53.5331		48.8262		36.1483		51.1121		35.0777		35.0235
57.7954										45.0268		32.2591				45.4924						58.9575		39.6107		46.0911		39.5752				35.7806				33.5696		55.4643		49.3693		34.9141		58.0032		44.8322		44.4843
57.0112										38.065		32.8295				58.5912						57.8245		41.0765		45.8871		35.6741				30.6304				27.6297		52.1122		47.3555		36.572		51.345		36.0658		36.5459
53.4689										21.7828		32.4292				56.1972						59.7428		41.3304		46.9494		32.6735				30.6683				24.7481		54.9907		51.5736		37.8152		53.1843		34.0598		46.1015
50.6134										33.7623		32.3208				55.6444						56.5043		40.3579		54.9835		38.1094				33.999				28.2882		54.3342		51.4752		34.1321		53.9079		44.299		48.7128
59.3629										31.5476		32.3946				42.0351						54.942		40.8611		52.2616		39.9802				31.6404				24.9059		52.8796		49.3832		37.1213		52.4716		37.617		43.8385
57.323										38.84		31.862				56.5862						56.6088		41.6825		51.2745		36.6274				31.1641				26.228		53.2109		51.3716		35.4238		54.8718		38.1756		34.952
58.9684										18.3416		31.0217				40.7939						55.3061		41.8064		50.9018		33.8547				34.5944				33.1613		54.0089		48.584		33.8802		57.4438		38.541		45.9905
59.3906										46.3213		31.7235				42.8391						57.2068		39.6114		46.3846		36.2665				30.3001				29.1816		54.7433		51.2127		33.4183		51.2014		39.3513		34.9507
53.2645										28.0995		31.0103				58.6555						54.9552		39.9189		47.8923		36.1282				32.6141				30.6731		52.6385		49.9979		37.4835		52.1505		38.2679		42.6208
54.1091										35.1249		32.0835				59.4194						59.7486		41.4823		53.6045		30.5466				33.3164				25.1132		53.431		46.6572		33.2757		53.5622		36.4782		46.789
53.0373										35.4418		31.692				46.9998						59.3976		41.3405		51.2469		35.7431				34.6221				27.4184		54.3182		48.203		35.8092		52.667		35.5386		45.0958
52.3496										28.906		32.6564				45.8486						58.7044		40.833		48.562		39.5788				32.7926				32.6186		53.5746		51.0736		33.9591		55.1448		35.6312		50.6036
56.3588										20.3766		32.5222				41.5285						56.8372		38.41		53.3058		33.246				32.9612				33.8264		54.3091		46.7447		35.8012		51.8345		44.2754		55.7786
58.3622										29.439		32.9982				40.1149						58.9042		38.5355		48.6618		35.2232				32.0441				33.6305		54.8875		49.1742		37.3262		59.5394		43.8729		40.3813
56.1985										22.8438		32.2328				45.1911						55.9695		39.0239		54.7821		30.7394				30.1771				23.6483		54.4848		47.7209		34.9194		54.6538		35.4079		42.5927
57.1031										24.0239		31.6249				51.7642						59.4121		41.3677		47.3286		36.4297				34.4479				23.6521		53.0484		48.8292		37.4093		53.4033		40.6841		34.0211
53.8028										26.8554		31.4346				53.2463						57.8075		39.3637		51.0261		39.2169				30.7603				32.244		55.8973		47.529		33.7252		51.9024		42.17		34.1602
52.4233										46.8912		31.1419				42.6123						59.8858		41.7853		49.988		32.5605				35.0278				28.8095		52.4317		47.4859		37.1542		55.2676		37.4941		49.7759
55.1211										46.7108		31.4074				59.0095						59.3297		41.4276		48.6504		37.8157				34.3904				29.133		55.9574		48.7072		34.7931		55.7492		39.9109		34.5325
52.7741										31.9325		31.7177				49.8937						57.2595		41.0547		51.6879		34.5184				30.527				30.6604		53.6007		47.121		35.3092		57.5773		41.2351		42.0202
53.5141										37.3712		32.5904				55.8002						54.5539		38.022		49.3308		34.9788				35.5444				25.1341		54.1582		48.0257		36.2905		51.5881		34.0093		36.286
57.4167										43.2951		31.8564				51.2965						56.0044		39.4448		50.5534		31.714				31.6591				32.7321		52.047		46.1813		33.7235		57.7177		44.8196		50.6129
59.4018										22.8678		32.084				41.6464						54.2548		41.1117		45.2838		39.8762				31.273				30.8368		55.4402		50.9315		34.8653		55.9665		38.1671		45.198
59.2913										34.2141		32.9647				42.3405						59.6132		40.103		48.4957		35.2029				30.078				25.2912		52.2442		47.7438		36.4787		53.8781		36.7954		38.7482
53.5645										17.3014		31.0252				56.722						57.9306		38.7076		52.6279		34.3463				33.5174				29.8488		53.4461		47.0172		37.6798		58.6302		36.9756		55.1346
52.2263										20.6883		32.5048				51.3324						58.7534		39.2476		46.8737		34.6899				33.5955				25.6831		55.9757		51.8903		37.3134		55.9709		35.1003		43.7151
54.5374										45.1964		32.7674				53.3255						58.8784		39.1921		50.8303		32.7625				31.481				26.627		54.102		50.2899		35.5879		51.1042		37.4847		50.9637
56.5899										30.1571		32.1105				49.9074						57.5028		40.2139		47.1078		39.1296				33.396				24.0715		55.5194		47.8837		37.7197		51.8981		41.6322		34.0776
59.5397										16.635		32.4372				53.8129						58.8808		39.828		51.8421		36.5342				34.2881				31.339		55.7582		51.6324		33.8537		50.5672		37.4214		51.4555
50.9008										31.7074		31.221				41.0968						55.2029		41.7123		54.2331		34.2474				33.8409				25.3717		55.3125		47.4058		34.0732		54.6125		41.0088		47.3232
55.5693										42.5957		31.5448				41.2983						59.5179		41.2266		50.5712		34.1582				35.8959				25.5149		54.7625		51.092		34.3729		53.5293		37.454		43.4068
53.088										39.3722		31.986				42.3919						55.4229		39.6735		54.7204		31.4145				35.1136				33.6351		53.6035		48.2777		35.3247		57.2715		35.4441		38.9342
57.933										46.5562		32.7029				43.4188						57.8397		39.2476		53.4213		37.0559				31.7419				25.1024		54.587		46.994		35.0742		59.3547		34.5461		53.4134
51.2824										41.4448		32.8068				58.0396						55.1679		38.2624		47.6185		30.9173				33.3417				28.2475		54.0469		47.4289		35.5213		50.68		39.2431		47.504
53.561										35.3711		31.1129				44.2849						54.636		38.5781		52.1328		38.3507				35.3333				27.8263		54.8539		51.7103		36.907		55.469		42.4667		48.5803
59.0896										18.5925		31.7057				57.7711						58.5584		39.6931		48.2924		30.0079				32.9581				24.1348		52.2486		47.2547		36.6296		57.8464		40.2266		44.7836
50.3348										19.0334		31.8824				59.8353						54.7346		38.2204		52.6347		39.0839				34.6451				24.4795		52.0885		49.7515		35.7036		55.5755		44.1367		54.4401
51.2972										19.4958		32.8574				59.8283						56.8617		39.5625		46.6613		30.2386				34.6476				26.0337		53.6589		50.0358		34.2812		52.9045		34.3477		44.8194
51.2143										40.207		31.4805				57.9919						59.2535		40.1635		48.6206		37.3186				30.0039				32.6711		53.5334		46.1631		36.4394		50.3783		38.5312		35.432
55.5367										30.8538		32.895				55.5716						55.7145		39.0252		53.0661		31.23				30.1941				29.3151		52.849		50.0184		34.5347		52.3593		36.1924		41.2408
50.2775										47.341		32.2672				40.6302						55.9534		38.5198		45.7329		35.6766				32.3901				26.722		55.3435		50.517		33.6075		52.9677		36.4742		47.7285
51.713										32.8437		32.0696				49.6765						57.7615		38.9352		51.4641		33.5733				33.4289				27.7086		52.1462		51.188		37.2538		53.1331		38.1179		38.8039
59.4188										29.5844		31.0081				52.8109						55.6011		40.0558		54.0759		38.1813				32.5828				23.7413		52.2906		47.1432		34.9428		58.1689		39.2171		44.2617
53.3542										26.4859		32.2464				59.01						57.9165		39.0213		49.5335		39.8527				34.1698				27.5878		53.6776		46.6399		35.3141		52.295		39.4118		36.6959
59.9577										35.7274		31.8189				57.9544						57.0332		40.9368		48.7565		35.6489				32.4968				25.63		54.2678		51.2058		33.9402		54.6076		40.3684		38.8138
55.8046										41.1407		32.9936				45.9922						59.4323		39.8324		53.0141		33.9985				33.1656				32.8331		52.4363		50.5724		34.9062		55.3948		39.0409		43.1869
58.0393										16.5742		31.7472				59.6736						55.1198		41.6015		54.3685		31.3346				32.9844				28.6742		54.0759		50.0024		33.5492		50.668		34.2529		54.2558
53.4675										40.4705		31.1476				51.7922						56.2441		40.5251		46.8099		31.5591				32.2853				24.9754		55.0734		47.2087		37.7146		57.9521		44.8982		44.6777
52.9774										28.6074		31.2952				47.5087						59.5719		40.956		48.751		31.2338				33.4557				32.3584		54.2659		51.9978		33.8568		58.4149		37.0314		37.1878
55.6701										45.8916		32.4185				51.4268						58.2574		38.2357		50.6322		36.0516				31.1048				28.6689		52.8206		50.9879		35.3432		50.7598		35.4085		50.8711
52.9022										25.5584		31.4319				58.2745						54.5384		41.8058		46.3611		37.5834				32.5065				25.3902		52.2933		46.4368		35.5123		58.8113		42.7542		48.9569
58.0479										40.7064		31.6835				41.0635						56.7237		41.135		52.9464		31.4517				30.7534				31.6269		54.4323		47.5902		37.1238		55.6257		43.3622		48.6392
58.775										16.2871		31.5229				55.0235						56.9685		38.8179		47.5144		32.2069				35.0175				25.8897		53.9153		50.1921		37.4127		50.0964		37.2517		36.2028
57.19										33.9094		31.0594				54.6928						59.4464		39.1604		46.8974		32.2479				34.1807				30.8722		52.9882		50.4139		34.9596		52.2822		41.0787		34.0125
59.8456										33.7509		32.7746				58.4187						56.3865		41.5585		54.4348		32.9882				34.4641				25.1119		55.7091		49.0653		34.043		58.4733		38.8984		49.3336
52.0623										33.5458		31.3956				50.9744						58.8837		38.7088		48.1207		37.9792				34.1878				27.7099		52.0562		49.4768		37.7793		53.8524		38.9333		50.6356
52.8493										42.8503		32.1677				47.804						54.2524		41.4635		46.7898		36.3206				34.4856				25.7992		54.8798		49.2726		34.2065		54.3306		35.9455		46.7942
59.0571										44.8563		31.2295				58.1824						57.5732		40.671		52.916		33.5717				31.5388				30.8423		53.0684		48.9235		35.2841		52.3873		40.4053		39.4257
56.7182										35.4639		31.3575				55.4989						55.782		40.9098		45.3552		34.4261				31.9942				31.6459		52.9452		48.6954		34.2799		57.9606		38.9673		55.8689
56.4115										46.3681		31.952				41.2504						56.7953		40.0313		45.0789		35.3921				34.6835				25.2302		54.3968		47.321		36.5127		50.9278		39.8378		55.1729
57.8496										45.7791		31.8667				59.5546						55.6464		41.4918		45.1954		32.5861				30.2913				27.5219		54.7688		49.3203		33.2993		58.7002		35.5779		53.6429
57.9072										19.5295		31.3814				45.8366						56.4286		38.1128		47.992		33.9174				33.7881				30.3836		54.8219		50.8962		35.5048		53.4325		39.9252		44.1522
53.6872										16.1643		32.4451				43.1957						57.2269		41.8386		47.3716		30.0052				34.0617				23.4979		54.9315		48.5329		35.1746		57.5132		43.4428		46.9569
50.7852										17.2686		32.4094				52.3005						56.3725		38.3058		50.215		30.3334				30.994				27.8996		52.5369		48.2128		36.3304		50.6036		38.112		52.5386
53.3545										32.0651		31.2463				50.9029						54.5314		38.9662		46.2169		36.4359				33.7338				27.1995		52.2869		46.1045		33.6093		50.0283		37.778		50.7261
53.9836										27.7273		32.0009				59.4289						57.5228		40.4439		45.5897		38.839				35.6671				23.7398		52.7172		51.4095		33.5985		55.7229		37.1525		46.8413
59.1904										40.4755		32.1862				55.1818						58.7901		38.322		50.9996		33.7176				35.2584				26.9334		54.4402		50.1689		33.7968		55.555		34.9196		35.802
59.2569										39.2581		31.9071				42.0675						58.2783		38.1696		54.7212		37.8515				30.8467				30.4264		53.1404		50.4599		35.7147		51.4022		38.4409		38.5329
58.6876										23.6395		32.2				56.6347						55.8637		39.53		49.3998		34.3291				32.6287				25.2559		52.3481		48.5539		36.583		54.4008		40.5286		36.237
51.4119										19.3394		31.6157				48.0719						56.6767		39.017		48.5883		32.1629				33.4378				27.2501		52.7747		46.2716		36.8582		54.7901		41.1235		35.1059
54.0394										20.0114		31.8874				56.7043						54.7887		38.5294		47.3478		37.971				32.778				26.1074		52.372		48.7845		33.728		59.4771		39.1711		41.2413
51.3853										39.6735		32.8507				58.6492						54.3905		38.633		50.9898		31.8335				30.5238				26.7058		55.7957		50.6981		34.9456		54.5256		34.1861		53.2666
54.0879										40.3014		32.3761				57.7169						56.1307		38.9864		48.9588		33.4508				31.0527				27.6755		53.6445		48.3729		36.2305		55.6407		41.3257		37.5298
57.1782										29.2435		32.3166				58.4448						55.8244		40.2346		54.015		30.888				33.1875				27.9127		54.3851		49.7055		36.8586		58.137		36.8845		43.4329
51.5171										46.7292		31.9261				40.0975						55.4319		41.8994		46.563		38.0156				33.5638				24.8976		52.9611		49.3208		36.0175		56.1843		39.6156		39.3214
56.4996										27.0607		32.533				44.3469						56.7945		38.07		46.488		32.0739				35.0687				27.3105		55.1177		51.6474		33.8625		53.3716		38.3354		51.7452
53.4468										45.0277		32.8162				59.3751						59.9059		39.3454		48.007		36.0898				32.8152				28.4911		53.389		47.8122		33.6242		57.1414		40.7184		34.0237
58.636										46.2117		31.7764				58.2704						54.0876		39.3601		45.408		30.6934				33.7504				26.0782		54.5525		46.8357		36.7572		50.7962		40.3677		44.1493
52.7319										17.5351		32.5418				42.4114						56.7395		38.592		52.7875		36.7416				34.7213				29.3244		53.8385		46.1974		33.493		56.1641		40.5897		48.1421
52.9913										23.1402		31.1778				50.9256						54.2913		39.5561		53.1829		39.6695				32.2482				23.5134		55.7069		49.2768		33.3993		55.2479		37.187		52.2788
56.3798										20.0139		32.4737				57.7665						54.4848		38.4255		53.7864		34.1775				31.108				33.2642		53.219		49.6048		34.2936		59.8475		36.0178		49.1553
56.2589										43.2887		32.8808				43.6705						59.0723		40.4586		53.208		30.322				31.269				25.4353		53.4771		50.492		35.6033		52.0706		44.7855		52.6094
54.4524										23.0122		31.1266				47.9469						54.4629		40.9066		47.6833		34.366				31.868				28.9377		52.9555		48.4324		37.7939		55.7152		39.3468		49.1342
50.3346										26.8872		31.3595				47.0451						57.1172		40.4371		54.6236		32.1411				32.362				27.5988		55.9033		47.6989		37.3194		50.3786		39.2621		44.3909
50.431										19.4978		31.3807				53.5121						56.4392		39.2107		54.5298		31.6068				32.2993				26.2092		55.9094		49.1739		34.6679		57.5659		40.2643		49.528
53.2339										42.1277		32.4859				59.1544						58.0775		39.3372		52.8079		32.894				31.1903				24.1293		55.7197		49.6485		35.3404		59.7288		44.0727		40.2457
58.9298										32.8291		32.2555				55.051						58.0324		41.6831		53.7007		36.6308				34.4947				30.3856		54.7053		48.5602		36.8947		58.7557		44.7412		45.4613
55.7974										36.4693		32.3727				51.0511						55.713		39.0316		52.9933		35.2454				33.5079				25.0864		52.3451		46.6821		37.6606		57.1579		39.5243		41.9102
56.1059										43.1241		31.7101				42.0601						54.1651		40.9539		46.6945		35.2623				35.7354				31.3047		53.9648		49.2419		36.9091		50.864		39.2266		54.8012
54.3032										34.3893		31.2105				51.6657						58.4078		41.7692		53.581		36.6586				33.2119				28.0577		55.4464		51.063		33.7489		52.4226		41.6171		38.6792
57.1841										42.4253		31.1434				46.4314						56.2986		38.3842		45.0313		37.6389				31.7927				26.9315		52.7306		49.7316		37.5176		53.9565		39.8769		54.8374
54.3803										30.2152		32.0817				52.7286						58.5546		40.1827		49.7706		39.7206				33.7054				33.8834		53.237		50.2825		36.3979		56.8198		38.9901		55.7365
58.6884										37.9606		31.3257				42.1106						56.7116		40.9439		47.3347		31.0666				34.7875				26.322		55.7696		48.6246		33.7874		55.889		40.0154		52.7411
58.5107										31.4327		31.534				53.2613						54.3628		39.169		46.5024		32.4432				35.87				24.8185		55.5246		49.3836		37.3951		55.8025		42.7441		51.5694
57.0124										33.8913		32.612				50.9403						57.1706		39.5638		50.1392		34.4605				30.8769				25.2175		53.0277		49.6988		37.5493		56.8834		35.6657		42.189
54.5043										42.3704		32.1576				46.4099						59.7841		39.7748		51.971		35.5249				35.8502				31.5268		55.7381		50.2773		34.4717		53.316		39.6285		48.446
53.0984										36.9312		32.3666				43.0445						57.6907		41.3199		46.1474		38.5009				31.3145				23.7114		55.8325		49.8872		36.7217		59.3399		41.2985		54.2422
58.2022										42.6001		32.512				52.3444						58.5574		39.8756		50.2684		36.5529				30.2366				29.776		52.0764		51.4538		36.4256		51.1684		37.8882		44.1181
56.0862										27.9147		32.0693				56.1856						57.438		40.2984		48.6521		31.265				32.5107				28.5884		53.7083		50.0893		34.3984		54.4179		40.9083		41.0162
52.2123										46.8621		31.7939				54.4104						58.7417		39.1906		49.8097		36.4375				32.184				23.6604		52.902		46.8288		36.4493		53.5895		43.5238		48.9991
54.1614										25.5424		32.4572				52.7945						56.0764		39.9502		54.163		34.5166				32.2091				33.3061		55.5155		50.7821		35.8348		58.0857		43.6877		52.1901
51.4854										42.0522		31.6328				41.5416						56.5781		39.2499		52.1391		32.5793				31.0612				28.9363		55.3578		48.6421		34.4978		52.2244		35.3015		54.9327
56.1347										28.8109		32.4704				47.2438						57.9409		40.4983		53.5836		33.062				34.8851				23.4757		55.8432		46.8629		37.4761		58.1485		36.7424		37.2925
55.0936										17.2112		31.2851				59.1987						58.6549		41.1641		54.0378		30.6699				31.412				23.8598		55.8555		47.091		36.9771		53.5216		43.0443		42.9985
50.7541										35.5308		31.9321				50.8871						56.9747		38.8065		53.4845		39.5489				33.539				25.0017		54.3741		46.664		34.4011		50.2958		41.7944		36.9509
52.7608										22.3833		32.4867				56.0048						58.5745		39.0215		47.0113		36.3604				35.9608				32.6653		53.0393		46.2043		34.7783		51.1452		40.6015		53.9946
57.5572										42.1739		31.8657				46.2501						59.3804		38.3622		50.1118		32.319				30.4019				32.3521		53.8201		48.417		36.7076		51.3757		38.4021		45.5925
50.5696										26.4812		32.8876				58.3648						56.3316		39.2911		53.6555		35.092				32.7933				29.2314		55.2523		46.6889		33.4337		55.4825		35.0716		53.8041
50.6967										39.334		31.8284				48.4133						56.4429		39.7321		45.8397		32.2326				35.5016				23.2968		55.888		46.8971		33.4771		55.2338		39.4849		34.0145
54.6474										39.9047		32.3165				48.465						59.9967		39.3386		45.8785		38.4266				30.6546				29.2641		52.0995		48.8629		34.5306		50.774		43.7304		36.2763
59.2353										36.0691		31.4771				50.0076						56.6356		41.7193		53.7459		34.1				35.3118				27.9389		53.3524		51.1355		34.4273		53.3506		42.3911		35.8874
58.8857										32.5775		31.4111				50.6218						54.5271		40.9927		47.4641		35.4711				35.4367				27.6639		55.8397		46.0206		37.07		58.929		43.1569		44.9088
57.6599										23.1238		31.0563				54.7732						59.2034		41.9343		47.9596		31.2563				32.8239				28.2278		54.458		50.4892		36.9693		50.6593		37.8997		50.5129
53.3626										27.8437		32.6632				55.8803						56.0145		38.5457		48.6046		33.0866				31.919				26.4447		55.7505		48.4283		36.312		59.2905		35.9443		34.2763
57.213										46.5473		32.8459				57.9062						57.2619		38.0525		47.3475		37.2538				33.9878				33.5677		53.2237		48.2592		37.7896		56.1795		41.9029		50.4918
54.5092										35.8455		31.6879				53.4665						55.8335		40.6132		47.4807		35.7291				31.4382				26.65		55.187		50.0935		35.2845		57.6453		43.3277		52.3797
56.2654										42.4783		31.2062				51.0087						57.1051		38.6444		51.1684		37.0447				34.1112				24.6082		53.4153		48.7525		35.5173		51.516		43.4408		39.1522
55.8184										23.1726		31.6716				49.912						57.6752		38.4076		49.9913		35.53				35.0336				23.6366		52.6674		50.9359		34.5932		54.4136		43.7332		36.5139
52.8229										32.228		31.6018				48.2139						57.7194		40.1148		52.5051		32.0411				34.5827				26.4837		54.0004		51.6762		36.9852		57.5605		42.6831		51.4158
58.1625										26.0527		31.9579				55.2585						58.0856		39.8425		54.8159		38.3029				35.7109				31.1728		54.2467		47.9441		33.3804		58.0279		38.3045		38.5748
58.1835										20.9438		31.1868				56.4344						54.3048		39.5792		54.0735		38.1406				30.9705				23.9095		53.3769		47.7139		35.1539		51.8359		39.0871		46.6955
52.5584										35.1164		32.4684				43.1009						59.079		39.5969		53.8631		34.2127				35.8655				24.7553		55.8641		50.4657		34.9937		52.8588		35.9072		43.6461
51.7584										16.3557		32.6894				59.9122						55.0624		39.5719		48.4747		35.0059				35.9798				23.4858		55.5873		48.5246		34.9509		51.4414		34.0156		40.2233
56.6765										23.4818		32.3402				42.1989						55.229		39.816		53.1145		30.184				30.8463				26.2981		53.9096		49.0562		34.6739		58.9385		39.9604		38.8288
50.361										22.834		31.5177				40.9865						58.9697		41.196		48.2154		34.0872				35.566				31.1523		54.389		48.9753		33.8903		53.4383		37.9811		54.9968
55.3476										19.4557		32.0804				54.0389						59.1813		40.695		45.4775		35.8962				32.3384				31.3178		52.1521		50.3331		35.5422		58.0703		43.3473		38.118
50.7702										38.2469		32.0688				40.2875						57.746		38.3887		46.2567		36.5872				30.2262				27.1565		55.3913		50.4275		33.3768		54.3644		34.5123		51.6763
59.6153										21.5995		32.6338				59.9565						56.8357		39.7636		46.7904		33.6204				32.1943				26.6567		55.779		49.6172		34.9551		53.9237		42.3727		50.3431
56.0898										34.5081		32.8053				40.8238						59.3802		38.2463		48.2187		30.4653				31.4358				32.0924		52.4436		49.9521		33.5293		56.5581		34.9879		42.9577
59.701										19.1769		31.0701				53.592						58.4893		40.586		54.9707		39.8788				34.7231				31.0893		53.0027		47.3026		34.4288		54.3854		42.4996		36.2701
57.5824										20.705		31.5367				41.907						57.8518		41.8064		51.6392		37.3531				34.8191				28.8423		53.4828		49.4529		37.4475		53.8956		38.7135		43.9852
59.9048										22.556		31.1685				56.9651						55.3873		40.0599		46.145		30.2123				35.0498				31.5519		54.8928		46.9172		36.5315		52.2435		37.3205		43.766
50.0633										32.9128		31.5822				44.3812						58.5933		38.4453		53.6114		34.1645				34.9379				29.8174		52.8783		47.7984		36.9398		50.7557		44.6256		37.0466
50.651										31.0158		32.4893				46.0812						58.4101		41.3128		52.2605		32.1265				33.3981				30.138		52.7762		51.0317		36.7412		54.911		43.377		50.1039
59.8078										23.3223		31.4015				54.5444						56.0864		41.7666		46.8128		31.9969				30.5469				26.9594		52.7454		47.1606		33.6467		54.3381		41.7023		42.1976
53.2465										18.236		32.7795				47.0438						55.578		41.8732		45.8726		33.2215				32.2446				31.5934		52.8062		48.8498		34.0516		56.7373		42.6762		51.3526
51.3128										23.8379		31.9103				51.5898						56.9779		38.9843		51.498		30.7068				32.8822				23.7455		54.3888		49.2214		37.1339		54.1597		37.2666		54.608
55.8871										22.0025		32.2044				45.7296						58.4464		38.7265		51.1835		32.2317				32.7372				23.5427		54.3119		47.3254		36.5353		55.7761		38.5853		49.2828
52.9148										37.873		31.9296				56.0959						58.6198		38.5662		45.6749		32.8754				30.4088				32.3881		54.9588		49.9897		35.5632		58.4039		37.1762		51.9847
59.1065										23.842		31.7908				52.9228						59.2504		40.9509		46.5858		37.8794				31.0736				26.1493		53.0946		46.6686		36.4951		57.5986		36.0285		39.8894
51.8028										38.1941		31.6655				45.256						56.3147		41.7649		52.4651		32.122				35.4296				27.5752		55.7047		47.1656		34.7004		58.1524		37.4258		50.7557
52.6488										17.7854		32.1524				51.4434						56.0962		41.1768		53.4273		38.6766				35.4156				32.5373		53.057		48.9055		33.439		57.2902		34.4365		50.9788
53.39										46.6997		31.5758				59.4818						58.7794		41.8513		53.8238		30.9525				32.3322				26.4113		52.5113		51.1525		37.3218		58.3865		35.3004		43.1628
54.0399										22.3014		31.6581				50.7774						54.7861		39.3979		46.1094		35.5073				33.6744				27.2355		52.4348		51.9092		37.2835		51.4882		42.7273		46.742
52.0755										22.1891		31.0832				47.8737						56.5734		39.7235		54.1398		37.14				32.4884				24.8013		53.5908		46.9085		34.4581		59.3		40.6955		50.2807
56.9096										43.6283		32.109				57.3606						59.4541		41.6854		46.4092		30.308				35.7191				24.8901		53.4856		49.7112		37.9945		53.1446		35.3698		38.0409
50.9866										44.1437		31.3859				41.1298						55.7798		41.8535		51.901		35.7147				35.3881				23.1646		52.7691		51.8395		37.3195		59.5143		39.5959		51.9128
53.3331										44.6357		31.8408				47.5322						56.2651		41.886		46.3002		36.9314				35.9034				28.3969		53.4497		46.8049		36.3072		50.5619		39.2611		49.6717
59.587										28.7146		32.5686				58.426						59.3178		38.8959		45.6957		37.6822				34.9433				26.0568		54.269		46.5625		37.9614		52.6047		39.0144		44.8354
58.2904										21.9256		31.651				47.398						58.9746		38.5296		51.0509		30.6154				33.5575				23.9252		55.1381		50.3069		37.0383		53.143		41.9687		48.9626
57.1										47.4662		32.3222				56.5814						57.3112		38.6927		48.5639		38.0121				34.6428				32.2757		54.527		51.0944		34.7465		56.5323		36.781		45.4548
57.4109										18.9635		31.7108				48.1402						56.8634		41.2009		50.7029		33.2807				34.939				25.8177		55.1117		48.3639		36.8374		52.6004		39.4546		44.7921
52.1899										37.1989		31.357				51.6945						56.0411		38.2585		53.8708		34.8916				35.4049				27.4473		55.5755		48.8289		36.9134		58.3898		34.8202		37.6402
50.6341										46.2709		31.1303				52.1314						59.7164		39.0308		49.093		39.725				33.3332				26.1176		55.7585		49.3469		34.8336		53.5038		43.1669		36.3897
59.3602										19.1946		32.1669				47.4807						58.0737		41.7904		51.2584		36.1468				32.0129				23.1672		54.1831		47.8997		37.327		52.3599		42.9836		45.3327
54.8401										23.9719		32.2547				57.8304						58.0134		39.149		48.881		33.949				33.978				23.6163		54.598		50.6377		33.7735		54.0424		37.7545		34.9684
59.3059										25.4083		31.1824				58.8042						59.6728		41.9015		51.8996		34.5786				35.5756				24.8327		54.6466		46.5785		36.8182		53.0176		44.4802		35.9904
51.3126										23.553		31.108				46.2403						59.1699		39.5384		53.8496		38.7649				34.8746				28.4616		55.3143		50.974		33.8865		51.8386		41.4091		50.8874
52.5956										32.7851		31.3378				44.1511						54.4019		41.0966		46.1567		39.0657				33.1645				29.4048		55.4289		46.7874		35.1917		56.9814		36.2433		53.0481
59.3565										17.4785		32.9402				46.5905						55.1191		40.25		45.5981		35.8638				30.6797				29.5798		52.7636		51.021		36.0918		53.8648		39.8368		51.2761
59.8059										26.5692		31.3007				57.7046						54.1107		40.056		47.3067		32.5242				34.8751				29.4598		54.25		46.864		34.7902		55.2511		42.0841		42.4767
56.2683										34.3255		31.4378				43.9705						59.9065		38.1773		47.3575		36.9735				31.9836				28.9933		55.2338		46.8305		35.1705		56.1326		39.9471		49.7825
51.469										24.3086		32.5551				46.3947						55.1647		39.7394		51.3462		36.0327				31.7824				24.9119		55.9588		47.4454		34.3172		54.281		44.9161		42.366
53.0181										36.3263		31.765				50.4323						54.658		38.4459		52.3644		33.0088				32.2766				23.2532		55.2025		47.7531		37.5231		59.8608		42.3258		34.2294
54.5482										45.5584		31.1469				49.7147						56.4645		38.6115		50.8634		32.761				33.1363				32.2696		53.5779		48.7755		37.0926		56.5594		43.1282		40.5395
55.897										26.937		31.6086				57.5529						54.9464		39.9573		46.6373		34.8119				31.7609				28.4659		52.4379		47.1935		34.4976		57.1909		37.8773		39.2738
50.2375										35.8823		31.9817				40.5401						57.7068		40.6727		52.7089		35.8409				35.002				26.4933		55.6408		46.5709		35.5462		50.9681		44.0287		36.605
58.6776										36.0121		32.7608				49.8715						54.9705		41.8351		50.713		31.6697				32.9693				30.9031		53.6828		51.85		37.4957		56.5388		37.2115		45.1835
57.1224										22.2507		32.9139				42.5813						57.128		40.2169		53.3751		33.3889				33.3094				33.8026		54.7939		47.5562		35.3528		59.0223		35.8418		46.1987
58.7878										17.958		31.9128				50.7236						56.1096		40.6528		47.1269		36.0365				33.1822				33.4289		55.7335		47.0353		33.7363		52.4478		41.5739		51.0445
58.5834										20.6874		32.3504				59.1214						56.2605		39.7883		50.4988		37.6123				30.0097				32.5939		52.937		50.7782		33.5183		54.5172		35.1152		52.5463
54.641										28.9828		32.4542				57.2084						58.4724		39.9515		45.4359		37.6844				30.2572				26.8934		53.0183		49.0428		36.5147		54.0948		43.2922		45.5111
58.2267										33.9578		31.0662				49.0298						55.7152		38.2288		45.5215		36.459				35.5883				31.1455		52.0319		49.355		34.8431		56.8907		40.7993		47.7382
58.7225										38.9515		32.7979				41.8853						55.4322		38.3134		52.4379		31.8119				32.5652				32.4322		54.694		46.3146		35.0109		59.5421		40.8772		34.7928
51.291										17.9082		31.3013				41.8513						59.545		39.5225		47.8723		31.5851				33.9587				32.3196		52.2754		49.5484		34.9562		53.2907		42.1346		51.5606
57.8503										21.5319		32.3093				54.1417						54.5562		38.2986		47.2612		36.6918				31.7969				31.5005		55.3089		50.2246		36.4137		52.6571		34.6239		46.2109
53.137										18.7073		32.0427				44.002						57.7442		40.7144		45.6949		31.0281				33.5043				27.3729		52.8273		51.7807		35.7566		56.5079		40.0175		46.3741
55.4905										42.1747		32.3609				41.0096						56.0876		41.4665		52.5205		38.0131				32.8517				32.2128		55.9324		46.8167		34.3367		56.6254		43.4711		37.2248
59.9753										24.3703		31.4476				53.7842						57.6989		41.7056		53.328		30.8855				33.4513				26.4854		54.1007		50.8332		35.5893		59.6769		41.4719		44.0831
56.4148										45.0187		31.6167				49.1662						59.2389		40.6197		47.2249		31.0754				35.7004				33.6374		54.2202		46.5596		37.6843		56.4126		35.8857		49.933
54.9577										38.4674		31.0129				44.9023						58.9248		39.7868		51.6733		33.1754				33.5562				32.3741		55.7333		48.4569		36.5364		58.2036		43.5301		45.5819
53.7987										17.7835		31.3461				45.6823						59.8202		40.934		48.1617		30.0236				33.7494				29.5776		55.5468		51.3142		36.1339		50.5916		38.5837		53.7189
59.9687										16.5901		31.9923				55.6837						58.2378		39.9227		46.1583		31.6438				34.3049				25.6088		53.4786		51.5418		36.4278		50.3212		35.6369		34.0087
58.1932										41.7436		32.1074				40.5809						57.124		41.0656		51.8541		36.0069				32.0384				32.3486		52.7517		47.1655		37.4519		57.4524		35.5838		51.3592
56.3114										42.5593		32.0178				46.7398						58.2692		39.5742		54.2536		34.2515				30.7909				33.2639		55.2415		47.5952		37.846		51.7556		38.0152		51.0643
57.301										28.357		31.3872				42.5221						56.7966		38.1618		45.5113		35.036				31.7688				28.177		52.0352		48.8542		37.4672		53.0297		38.5203		54.385
52.5868										37.4985		31.2807				59.8092						54.5709		38.4852		51.6425		33.7546				30.0436				31.0915		52.798		46.888		35.8031		52.4607		38.4319		51.0152
53.6323										34.9945		32.6276				49.2665						58.5025		38.0612		50.8681		35.7854				33.2267				23.8578		55.1896		50.2133		37.1697		57.3666		43.6242		45.4722
59.8549										20.3338		31.5864				42.4453						58.4044		39.6191		46.3956		37.3938				33.0582				23.1219		53.9478		49.4516		35.15		54.4273		37.9674		51.5573
50.3208										35.9771		32.7478				41.4305						55.9844		41.3173		46.2784		31.5312				31.7266				33.8548		54.4469		48.603		34.3947		52.5211		39.9969		42.8348
58.4778										42.816		31.0009				57.5927						57.1642		40.1893		45.7654		38.4997				31.1829				23.3279		53.8427		50.5148		34.2263		53.0974		39.1656		51.5426
51.8223										36.8621		31.385				48.7157						56.4178		38.2044		52.5465		30.4634				30.4744				27.3958		54.4145		48.5884		35.3825		51.7124		42.8817		55.522
[truncated: 211 more rows]
[truncated: 96 more columns]

## Sheet: G51382
Cheng, F., et al., 2023, Linking source and sink: The timing of deposition of Paleogene syntectonic strata in Central Asia: Geology, https://doi.org/10.1130/G51382.1
